# **Rationally designed oral vaccines can set an evolutionary trap for *Salmonella* Typhimurium**

Médéric Diard<sup>1,2,\*</sup>, Erik Bakkeren<sup>1</sup>, Daniel Hoces<sup>3</sup>, Verena Lentsch<sup>3</sup>, Markus Arnoldini<sup>3</sup>, Flurina Böhi<sup>1,17</sup>, Kathrin Schumann-Moor<sup>1,19</sup>, Jozef Adamcik<sup>3</sup>, Luca Piccoli<sup>4</sup>, Antonio Lanzavecchia<sup>4</sup>, Beth M. Stadtmueller<sup>5</sup>, Nicholas Donohue<sup>6,18</sup>, Marjan W. van der Woude<sup>6</sup>, Alyson Hockenberry<sup>7,8</sup>, Patrick H. Viollier<sup>9</sup>, Laurent Falquet<sup>10,11</sup>, Daniel Wüthrich<sup>12</sup>, Ferdinando Bonfiglio<sup>13</sup>, Adrian Egli<sup>12,13</sup>, Giorgia Zandomenighi<sup>14</sup>, Raffaele Mezzenga<sup>3,15</sup>, Otto Holst<sup>16</sup>, Beat H. Meier<sup>14</sup>, Wolf-Dietrich Hardt<sup>1,\*</sup>, Emma Slack<sup>1,3,\*</sup>

Affiliations;

1. Institute for Microbiology, Department of Biology, ETH Zürich, Zürich, Switzerland
2. Biozentrum, University of Basel, Basel, Switzerland
3. Institute for Food, Nutrition and Health, ETH Zurich, Zurich, Switzerland
4. Institute for Research in Biomedicine, Università della Svizzera italiana, Bellinzona, Switzerland
5. Department of Biochemistry, University of Illinois at Urbana-Champaign, Urbana, Illinois USA
6. York Biomedical Research Institute, Hull York Medical School, University of York, York, UK
7. Department of Environmental Microbiology, Eawag, Dübendorf, Switzerland
8. Department of Environmental Sciences, ETH Zürich, Switzerland
9. Microbiology and Molecular Medicine, University of Geneva, Geneva, Switzerland
10. Department of Biology, University of Fribourg, Fribourg, Switzerland
11. Swiss Institute of Bioinformatics, Fribourg, Switzerland
12. Infection Biology, Basel University Hospital, Basel, Switzerland
13. Department of Biomedicine, University of Basel, Basel, Switzerland
14. Institute for Physical Chemistry, ETH Zurich, Zurich, Switzerland
15. ETH Zurich, Department of Materials, Wolfgang-Pauli-Strasse 10, 8093 Zürich.
16. Forschungszentrum Borstel, Borstel, Germany

Current addresses:

17. Department of Molecular Mechanisms of Disease, University of Zurich, Zurich, Switzerland
18. Department of Orthopedics and Trauma, Medical University of Graz, Graz, Austria.
19. University of Zurich, Center of Dental Medicine, Oral Biotechnology & Bioengineering

\*Corresponding authors

## **One sentence summary**

By tracking vaccine-driven *Salmonella* evolution in the intestine, it is possible to rationally design oligovalent oral vaccines that generate an evolutionary trap.

## **Abstract**

Secretory antibody responses (Immunoglobulin A, IgA) against repetitive bacterial surface glycans, such as O-antigens and capsules, can protect against intestinal pathogenic *Enterobacteriaceae*. However, efficacy of such immune responses has been limited by rapid glycan evolution and phase-variation. Here, we track IgA-driven O-antigen variation in *Salmonella* Typhimurium, and use this to assemble an oligovalent oral vaccine which sets an

evolutionary trap. IgA targeting all fitness-neutral O-antigen escape variants of *Salmonella* Typhimurium rapidly selected for mutants with very short O-antigen: a phenotype known to display major fitness costs and virulence attenuation in naive hosts. Evolutionary trap vaccination therefore represents an alternative concept in vaccine design. This approach capitalizes on the inevitable and rapid evolution of bacteria in the gut, and can combine protection of the individual with elimination of virulent enteropathogen reservoirs.

## 1 Main text

2 O-Antigen, the long repetitive glycan portion of lipopolysaccharide(1) (LPS), thickly carpets  
3 the surface of all *Salmonella enterica* subspecies *enterica* serovar Typhimurium (*S.Tm*) (**Fig.**  
4 **S1**) in the gut lumen. These glycans are sufficiently long and uniform to shield all non-  
5 protruding outer membrane proteins (e.g. most membrane channels(2–4)) from antibody  
6 binding(5). Protruding surface appendages, such as flagella or adhesins, do extend through the  
7 O-antigen. However, these are typically only expressed on a subset of the population(6, 7)  
8 such that only a fraction of the bacterial population can ever be clumped by antibodies against  
9 such antigens(8, 9). High-affinity intestinal Immunoglobulin A (IgA) against O-antigen,  
10 induced by vaccination or infection(10–12), is therefore the dominant mechanism driving  
11 clumping by enchainment growth and agglutination(9). As clumped bacteria are unable to  
12 approach the gut wall, this phenomenon provides protection from disease(9, 13, 14).  
13 However, oral vaccines targeting *Escherichia coli*- and *Salmonella* glycans typically generate  
14 weak protection(15–19). The ability of the bacteria to evolve or phase-vary their surface  
15 glycan antigens can be a major contributor to this failure (7, 20, 21).

16  
17 We initially set out to investigate why vaccine-mediated protection fails in non-Typhoidal  
18 *Salmonellosis*. Animals that were vaccinated with a high-dose inactivated oral *S.Tm* vaccine  
19 (PA-*S.Tm*) and infected with wild-type *S.Tm* sporadically developed disease, involving both  
20 intestinal inflammation (quantified via fecal lipocalin 2, **Fig. 1A**) and tissue invasion  
21 (mesenteric lymph node colony forming units (CFU), **Fig. 1B**). Strikingly, disease did not  
22 correlate with IgA titres specific for the wild-type vaccination strain, i.e. occurred despite  
23 robust seroconversion (**Fig. 1C**).

24  
25 As the IgA response was robust, we investigated the phenotype of *S.Tm* clones after growth  
26 in the gut lumen of infected mice. Notably in this model, protection is independent of  
27 intestinal colonization, i.e. the gut luminal *S.Tm* population size is similar in both protected  
28 and diseased mice(9). *S.Tm* clones re-isolated from the feces of "vaccinated but diseased"  
29 mice at day 3 post-infection showed weaker binding to vaccine-induced IgA than *S.Tm* clones  
30 re-isolated from feces of vaccinated protected mice (**Fig. 1D**). This suggested the importance  
31 of another phenomenon driven by IgA: the presence of IgA exerts a strong selection against  
32 the expression of cognate antigens on the surface of luminal *S.Tm*(9). Combined with the  
33 large population size and rapid growth of gut luminal pathogens(9), this generates ideal  
34 conditions for rapid evolution of IgA escape variants.

35  
36 In order to identify changes in surface antigenicity of *S.Tm*, we phenotypically and  
37 genetically characterized the *S.Tm* clones from "vaccinated but diseased" mice. Based on our  
38 observation that protection critically depends on the O-antigen (5, 9), we focused on O-  
39 antigen structure. The *S.Tm* O-antigen is a polymer of -mannose- $\alpha$ -(1→4)rhannose- $\alpha$ -(1→  
40 3)galactose- $\alpha$ -(1→2) with an acetylated  $\alpha$ -(1→3)-linked abequose at the mannose (**Fig 1E**).  
41 Wild-type *S.Tm* strains react strongly to O:12 typing antibodies (recognizing the triose  
42 backbone) and O:5 typing antisera (recognizing the acetylated abequose). Further, *S.Tm* has  
43 multiple options for rapidly generating O-antigen variants. *S.Tm* can shift from O:5 to O:4  
44 (i.e. from an O-antigen with acetylated abequose, to one with non-O-acetylated abequose) by  
45 loss of function mutations in *oafA*, the abequose acetyl transferase. It can further shift  
46 between O:12 (wild-type) and O:12-2 (glucosylated) serotypes by methylation-dependent  
47 expression of a glucosyl transferase operon STM0557-0559 i.e. by phase variation (22, 23).

This operon encodes the machinery to add glucose via an  $\alpha$ -(1→4) linkage to the backbone galactose(22). It should be noted both O-acetylation and backbone-glucosylation represent major changes in the hydrophobicity or steric properties of the O-antigen repeat unit, which when extensively polymerized into full-length O-antigen will have major consequences for antibody binding(24–26).

We applied multiple techniques to determine the O-antigen structure of evolved *S.Tm* clones. Flow cytometry with serotyping antibodies (**Fig. 1F**), High Resolution-Magic Angle Spinning (HR-MAS) on intact bacteria (**Fig. S2A and B**) and <sup>1</sup>H-NMR (27) on purified lipopolysaccharide (**Fig. S2C**) confirmed the loss of abequose O-acetylation (O:5 to O:4) and gain of  $\alpha$ -(1→4)-linked glucosylation of galactose (O:12 to O:12-2) in clones from vaccinated but diseased mice. The emergence of these variants was also observed at later stages during chronic mouse infections with attenuated *S.Tm* (**Fig. S3**). This was dependent on the presence of Rag1 and IgA (**Fig. S3**), suggesting that IgA-dependent selective pressure for O-antigen switching can be generated both by vaccination and by immunity arising naturally during infection.

We then explored the underlying genetic mechanisms responsible for altered O-antigen structure in the evolved clones. We first determined the stability of the observed O-antigen phenotypes, i.e. whether we would see reversion during cultivation. *In vitro* serial passages of evolved clones over 5 days revealed that the switch from O:5 to O:4 was a stable, uniform phenotype (**Fig. 1F and S4A**). Sequencing of O:5-negative evolved clones revealed a common 7 base-pair contraction of a tandem repeat within the *oafA* open reading frame, generating a frame-shift and loss of function (**Fig. 2A and B**). Targeted deletion of *oafA* (*S.Tm*<sup>Δ*oafA*</sup>) generated an identical phenotype to the 7 bp deletion (**Fig. 2B**). The same mutation was detected in deposited genomes of *S. Tm* isolates from swine(28) and is found in other O:5-negative serovars (e.g., *Salmonella enterica* Heidelberg CP031359.1 "Strain 5" (**Fig. S5A**)(29)). As there are only two copies of the 7 base-pair motif in the wild type ORF, the deletion of one 7 base-pair stretch is unlikely to be reversed(30) (**Fig. 2A, Fig. S5A**). Intriguingly, deposited sequences also indicate copy number variation in a 9bp repeat in the promoter region of *oafA* (**Fig. S5B**), suggesting a second possible site of microsatellite instability in this gene.

When next assessed the stability of O:12 to O:12-2 switching, and its underlying genetic mechanism. In contrast to O:5, the loss of O:12 was reversible during 3 rounds of serial passage and both wild-type and evolved clones generated a bimodal staining pattern, consistent with phase variation (**Fig. 1F and S4A and B, Supplementary movies A and B**, clones referred to henceforth as O:12<sup>Bimodal</sup>). In line with known epigenetic regulation of the *gtrABC* operon expression(22), re-sequencing of the O:12<sup>Bimodal</sup> strains revealed no consistent mutational pattern (supplementary table 3). Instead, a semi-quantitative full-genome methylation analysis supported that evolved O:12<sup>Bimodal</sup> *S.Tm* clones form mixed populations based on DNA methylation. Populations of evolved clones presented a high proportion of chromosomes with a methylation pattern typical of the promoter of *gtrABC* in the ON state(22, 31, 32) and a minor population in the OFF state (**Fig. 2C**): a situation which is reversed in the ancestral strain. Targeted deletion of *gtrC* (*S.Tm*<sup>Δ*gtrC*</sup>), the serotype-specific glucosyl transferase of the *gtrABC* operon, abolished the ability of *S.Tm* to switch to an O:12-bimodal phenotype, even under strong *in vivo* selection (**Fig. S6**). Mathematical modeling of

O:12/O:12-2 population sizes for fixed switching rates (supplementary methods, **Fig. S4C-E**), and comparison of flow cytometry and a *lacZ* transcriptional fusion, suggests that *in vivo* selection of O:12-2-producing clones by IgA is sufficient to explain their relative proportion in the O:12<sup>Bimodal</sup> population without needing to infer any change in the switching rate (**Fig. S4**).

Therefore *S.Tm* clones with an altered O-antigen structure rapidly emerged in vaccinated mice. In order to quantify how strongly vaccine-induced IgA can select for O-antigen variants, we designed competition experiments using isogenic mutant pairs carrying targeted deletions in *oafA* and/or *gtrC*. This allowed us to study each O-antigen variant in isolation.

We first quantified selection for the genetic switch from an **O:5** to an **O:4** serotype. Competitions between *S.Tm* <sup>$\Delta oafA \Delta gtrC$</sup>  (**O:4**, O:12-locked) and *S.Tm* <sup>$\Delta gtrC$</sup>  (**O:5**, O:12-locked) were carried out in mice vaccinated against either *S.Tm* <sup>$\Delta oafA \Delta gtrC$</sup>  (**O:4**) or *S.Tm* <sup>$\Delta gtrC$</sup>  (**O:5**). IgA responses were strongly biased to recognition of the corresponding O:5 or O:4 *S.Tm* O-antigen and mediated a substantial selective advantage of expressing the alternative O-antigen variant (up to 1e7-fold by day 4, **Fig. 3A-C**). The magnitude of the selective advantage correlated tightly with the magnitude of the specific IgA response against the reactive strain (**Fig. 3B-C**). Deletion of *oafA* was fitness-neutral in naïve hosts during 4 days of infection (**Fig. 3A**). Specific IgA can therefore act as a strong evolutionary pressure selecting for mutations in genes encoding O-antigen-modifying enzymes.

We next quantified the selective advantage of phase-variation between **O:12** and **O:12-2** using strains with an *oafA*-mutant background (i.e. O:4-locked, to prevent uncontrolled O:5 to O:4 mutational changes). Mice were mock-vaccinated or vaccinated against *S.Tm* <sup>$\Delta oafA \Delta gtrC$</sup>  (**O:12-locked**). Competitive infections were then carried out between *S.Tm* <sup>$\Delta oafA$</sup>  (**O:12-phase-variable**) and *S.Tm* <sup>$\Delta oafA \Delta gtrC$</sup>  (**O:12-locked**) strains. In line with published data, we observe a very mild fitness benefit of O:12 phase variation in naïve mice. In contrast, phase-variation was a major benefit to *S.Tm* in a subset of vaccinated animals (**Fig. 3D**). On closer examination, we observed considerable variation in the bias of IgA towards recognition of O:12 only, or of O:12 and O:12-2 with similar titres, likely due to the stochastic nature of antibody generation towards different epitopes of the O-antigen repeat. In fact, a benefit of phase-variation (i.e. a low competitiveness of the phase-locked strain) correlated with a weak anti-O:12-2 IgA response. i.e. phase-variation is beneficial whenever the phase variant is poorly bound by IgA (**Fig. 3E**). Correspondingly, O:12-phase variation, vaccine escape and inflammation were largely observed in mice where IgA bound poorly to the O:12-2 variant (**Fig 3F and G**). The mechanistic basis of this selective advantage could be confirmed by complementation of the *gtrC* gene in trans (**Fig. S7**). It is interesting to note that *gtrABC* operons are often found in temperate phage(20, 23), suggesting that the ability of *S.Tm* to quickly evade IgA mediated immunity may be further promoted by co-option of phage-encoded fitness factors (morons(33)).

Therefore IgA escapers, i.e. *S.Tm* mutants or phase variants only weakly recognized by vaccine-induced IgA, arise within 1-3 days of infection. Wherever IgA escapers dominated we observed full invasive and inflammatory disease (**Fig. S8**). Thus, both mutation and epigenetic switching processes shape the O-antigen structure of *Salmonella* and can increase the pathogen's fitness in the intestine of mice immune to specific serotypes. These changes can occur without any major loss of pathogen fitness in naïve hosts (**Fig. 3A and D**).

From these observations we hypothesized that a vaccine combining all four possible O-antigen variants (Evolutionary trap vaccine, abbreviated as PA-S.Tm<sup>ET</sup>, generated by mixing vaccines containing the O:5,12 S.Tm<sup>ΔgtrC</sup>, O:4,12 S.Tm<sup>ΔoafA ΔgtrC</sup>, O:4,12-2 S.Tm<sup>ΔoafA pgtrABC</sup>, and O:5,12-2 S.Tm<sup>pgtrABC</sup> strains) should generate enhanced disease protection by cutting off the observed O-antigen escape pathways. Although this vaccine induced a broader antibody response (Fig. 4A), we observed equally good protection in both vaccinated groups (Fig. S9). However, closer observation revealed that PA-S.Tm<sup>ET</sup> vaccination selected for another class of O-antigen variant: mutations generating a single-repeat O-antigen(34). These can be identified by weak binding to typing antisera (Fig. 4B) and by gel electrophoresis of purified LPS (Fig.4C). Sequencing of evolved clones revealed a large deletion encompassing the *wzyB* gene, encoding the O-antigen polymerase(34) (Fig. 4E, Fig. S10 also found in some "non-typable" S.Tm isolates from human(34)). This deletion is mediated by site-specific recombination between direct repeats flanking the *wzyB* locus. This deletion was detected in all tested S.Tm short O-antigen isolates from PA-S.Tm<sup>ET</sup> vaccinated mice across two independent experiments. We did not observe mutations in *wbaP*(34) (complete loss of O-antigen) or *opvAB*(35) (dysregulated O-antigen length). Intestinal IgA from PA-S.Tm<sup>ΔoafA</sup> vaccinated mice showed higher titres against the long O-antigen than the single-repeat O-antigen (Fig. 4D). This weaker binding to the very short O-antigen is consistent with lower O-antigen abundance or loss of avidity (Fig. 4B, Fig. S1).

Single infections revealed that, in comparison to isogenic wild type counterparts, *wzyB*-deficient mutants (synthetic or evolved) are significantly less efficient at colonizing the gut of streptomycin pretreated naïve mice (Fig. 4F), disseminating systemically (Fig. 4G) and triggering inflammation (Fig. 4H). This attenuation can be attributed to compromised outer membrane integrity(36) (Fig S11).

We then tested whether IgA-mediated selection could drive outgrowth of clean *wzyB* deletion mutants. Competitions between S.Tm<sup>ΔoafA ΔgtrC</sup> (O:4,12-locked, **long O-antigen**) and S.Tm<sup>ΔoafA ΔgtrC ΔwzyB</sup> (O:4,12-locked, **single repeat O-antigen**) mutants in the intestine of vaccinated and mock-vaccinated or antibody-deficient mice revealed a large fitness cost of the *wzyB* deletion in naïve animals, as observed in earlier studies(34, 37) (Fig. 4I). However, in the gut of vaccinated mice, the fitness cost of decreased outer-membrane integrity in *wzyB* mutants was clearly outweighed by the benefit of avoiding O-antigen specific IgA binding (Fig. 4I). Vaccinated IgA<sup>-/-</sup> mice were indistinguishable from naïve mice in these experiments, i.e. IgA and not any other effect of the vaccine was responsible for the phenotype. PA-S.Tm<sup>ET</sup>-elicited IgA can therefore select for mutants with a fitness cost in naïve hosts.

To demonstrate that vaccine-induced IgA, and not further genetic change in S.Tm drive this out-competition, we carried out fecal transfer experiments. Full fecal pellets from PA-S.Tm<sup>ET</sup> vaccinated mice that had been infected for 4 days with the short/long O-antigen mixture were delivered to streptomycin-treated naïve hosts. S.Tm<sup>ΔoafA ΔgtrC ΔwzyB</sup> (single-repeat O-antigen) dominated the population in the donor feces. However, on transfer to the naïve environment the *wzyB* mutant was rapidly out-competed by the S.Tm<sup>ΔoafA ΔgtrC</sup> (full length O-antigen) (Fig. 4J-L). Thus, outgrowth in vaccinated mice is not due to compensatory mutations in the *wzyB* mutants, but to antibody-mediated selection. In real transmission settings, for example between farm animals where the intestinal niche is limited and transmission includes a period of exposure to environmental stresses, we expect these mutants to transmit very poorly.



In conclusion IgA induced by "Evolutionary Trap" vaccines can drive the outgrowth of *S.Tm* mutants producing very short O-antigens. Such mutants have a major fitness disadvantage on transmission into naive hosts, with important implications for disease spread. While the cocktail of O-antigen variants incorporated into evolutionary trap vaccines will be strain-specific, the relative ease of production and low costs of inactivated whole-cell oral vaccines suggest that this could be feasible either for pandemic strain targeting, personalized medicine or farm-specific vaccines.

Intestinal bacteria, which typically form large populations that evolve rapidly, have proven highly challenging to target with standard vaccine design: i.e. vaccines targeting a single conserved antigen. Here we suggest an alternative strategy, which turns the rapid evolution of gut bacteria from a major challenge into an advantage. Using oligovalent vaccines, we can generate a breadth of IgA responses against all fitness-neutral O-antigen modifications. These force the emergence of *S.Tm* variants with a fitness disadvantage in naïve hosts. The "Evolutionary trap" approach therefore has considerable potential as prophylaxis for diseases caused by common, increasingly antibiotic resistant, *Enterobacteriaceae* in both humans and farm animals.

## References

1. B. Liu, Y. A. Knirel, L. Feng, A. V. Perepelov, S. N. Senchenkova, P. R. Reeves, L. Wang, Structural diversity in *Salmonella* O antigens and its genetic basis. *FEMS Microbiol. Rev.* **38**, 56–89 (2014).
2. P. van der Ley, P. de Graaff, J. Tommassen, Shielding of *Escherichia coli* outer membrane proteins as receptors for bacteriophages and colicins by O-antigenic chains of lipopolysaccharide. *J. Bacteriol.* **168**, 449–451 (1986).
3. P. van der Ley, O. Kuipers, J. Tommassen, B. Lugtenberg, O-antigenic chains of lipopolysaccharide prevent binding of antibody molecules to an outer membrane pore protein in *Enterobacteriaceae*. *Microb. Pathog.* **1**, 43–9 (1986).
4. A. T. Bentley, P. E. Klebba, Effect of lipopolysaccharide structure on reactivity of antiporin monoclonal antibodies with the bacterial cell surface. *J. Bacteriol.* **170**, 1063–8 (1988).
5. K. Moor, S. Y. Wotzka, A. Toska, M. Diard, S. Hapfelmeier, E. Slack, Peracetic Acid Treatment Generates Potent Inactivated Oral Vaccines from a Broad Range of Culturable Bacterial Species. *Front. Immunol.* **7**, 34 (2016).
6. N. E. Freed, O. K. Silander, B. Stecher, A. Böhm, W.-D. Hardt, M. Ackermann, A simple screen to identify promoters conferring high levels of phenotypic noise. *PLoS Genet.* **4**, e1000307 (2008).
7. M. W. van der Woude, A. J. Bäuml, Phase and antigenic variation in bacteria. *Clin. Microbiol. Rev.* **17**, 581–611, table of contents (2004).
8. I. D. Iankov, D. P. Petrov, I. V. Mladenov, I. H. Haralambieva, O. K. Kalev, M. S. Balabanova, I. G. Mitov, Protective efficacy of IgA monoclonal antibodies to O and H antigens in a mouse model of intranasal challenge with *Salmonella enterica* serotype Enteritidis. *Microbes Infect.* **6**, 901–910 (2004).
9. K. Moor, M. Diard, M. E. Sellin, B. Felmy, S. Y. Wotzka, A. Toska, E. Bakkeren, M. Arnoldini, F. Bansept, A. D. Co, T. Völler, A. Minola, B. Fernandez-Rodriguez, G. Agatic, S. Barbieri, L. Piccoli, C. Casiraghi, D. Corti, A. Lanzavecchia, R. R. Regoes, C. Loverdo, R. Stocker, D. R. Brumley, W.-D. Hardt, E. Slack, High-avidity IgA protects the intestine by enchainning growing bacteria. *Nature.* **544**, 498–502 (2017).
10. K. Endt, B. Stecher, S. Chaffron, E. Slack, N. Tchitchek, A. Benecke, L. Van Maele, J.-C. J.-C. Sirard, A. J. A. J. Mueller, M. Heikenwalder, A. J. A. J. Macpherson, R. Strugnell, C. von Mering, W.-D. W.-D. Hardt, The microbiota mediates pathogen

- clearance from the gut lumen after non-typhoidal salmonella diarrhea. *PLoS Pathog.* **6**, e1001097 (2010).
11. E. Valguarnera, M. F. Feldman, in *Methods in enzymology* (2017; <http://www.ncbi.nlm.nih.gov/pubmed/28935107>), vol. 597, pp. 285–310.
12. E. Diago-Navarro, I. Calatayud-Baselga, D. Sun, C. Khairallah, I. Mann, A. Ulacia-Hernando, B. Sheridan, M. Shi, B. C. Fries, Antibody-Based Immunotherapy To Treat and Prevent Infection with Hypervirulent *Klebsiella pneumoniae*. *Clin. Vaccine Immunol.* **24** (2017), doi:10.1128/CVI.00456-16.
13. O. Pabst, New concepts in the generation and functions of IgA. *Nat. Rev. Immunol.* **12**, 821–832 (2012).
14. K. P. Gopalakrishna, B. R. Macadangdang, M. B. Rogers, J. T. Tometich, B. A. Firek, R. Baker, J. Ji, A. H. P. Burr, C. Ma, M. Good, M. J. Morowitz, T. W. Hand, Maternal IgA protects against the development of necrotizing enterocolitis in preterm infants. *Nat. Med.* (2019), doi:10.1038/s41591-019-0480-9.
15. WHO | Antimicrobial resistance: global report on surveillance 2014. *WHO* (2016).
16. T. C. Darton, C. Jones, C. J. Blohmke, C. S. Waddington, L. Zhou, A. Peters, K. Haworth, R. Sie, C. A. Green, C. A. Jeppesen, M. Moore, B. A. V Thompson, T. John, R. A. Kingsley, L.-M. Yu, M. Voysey, Z. Hindle, S. Lockhart, M. B. Szein, G. Dougan, B. Angus, M. M. Levine, A. J. Pollard, Using a Human Challenge Model of Infection to Measure Vaccine Efficacy: A Randomised, Controlled Trial Comparing the Typhoid Vaccines M01ZH09 with Placebo and Ty21a. *PLoS Negl. Trop. Dis.* **10**, e0004926 (2016).
17. B. Nagy, P. Z. Fekete, Enterotoxigenic *Escherichia coli* (ETEC) in farm animals. *Vet Res.* **30**, 259–84 (1999).
18. S. Leach, A. Lundgren, N. Carlin, M. Löfstrand, A.-M. Svennerholm, Cross-reactivity and avidity of antibody responses induced in humans by the oral inactivated multivalent enterotoxigenic *Escherichia coli* (ETEC) vaccine ETVAX. *Vaccine.* **35**, 3966–3973 (2017).
19. B. L. Bearson, S. M. D. Bearson, B. W. Brunelle, D. O. Bayles, I. S. Lee, J. D. Kich, Salmonella DIVA vaccine reduces disease, colonization and shedding due to virulent *S. Typhimurium* infection in swine. *J. Med. Microbiol.* **66**, 651–661 (2017).
20. R. J. Mostowy, K. E. Holt, Diversity-Generating Machines: Genetics of Bacterial Sugar-Coating. *Trends Microbiol.* **26**, 1008–1021 (2018).
21. D. Gerlach, Y. Guo, C. De Castro, S.-H. Kim, K. Schlatterer, F.-F. Xu, C. Pereira, P. H. Seeberger, S. Ali, J. Codée, W. Sirisarn, B. Schulte, C. Wolz, J. Larsen, A. Molinaro, B. L. Lee, G. Xia, T. Stehle, A. Peschel, Methicillin-resistant *Staphylococcus aureus* alters cell wall glycosylation to evade immunity. *Nature.* **563**, 705–709 (2018).
22. S. E. Broadbent, M. R. Davies, M. W. van der Woude, Phase variation controls expression of *Salmonella* lipopolysaccharide modification genes by a DNA methylation-dependent mechanism. *Mol. Microbiol.* **77**, 337–53 (2010).
23. M. R. Davies, S. E. Broadbent, S. R. Harris, N. R. Thomson, M. W. van der Woude, Horizontally acquired glycosyltransferase operons drive salmonellae lipopolysaccharide diversity. *PLoS Genet.* **9**, e1003568 (2013).
24. B. W. Sigurskjold, E. Altman, D. R. Bundle, Sensitive titration microcalorimetric study of the binding of *Salmonella* O-antigenic oligosaccharides by a monoclonal antibody. *Eur. J. Biochem.* **197**, 239–246 (1991).
25. D. A. Brummell, V. P. Sharma, N. N. Anand, D. Bilous, G. Dubuc, J. Michniewicz, C. R. MacKenzie, J. Sadowska, B. W. Sigurskjold, B. Sinnott, Probing the combining site of an anti-carbohydrate antibody by saturation-mutagenesis: role of the heavy-chain CDR3 residues. *Biochemistry.* **32**, 1180–7 (1993).
26. M. Yang, R. Simon, A. D. MacKerell, Jr., Conformational Preference of Serogroup B *Salmonella* O Polysaccharide in Presence and Absence of the Monoclonal Antibody Se155-4. *J. Phys. Chem. B.* **121**, 3412–3423 (2017).
27. K. Ilg, G. Zandomenighi, G. Rugarabamu, B. H. Meier, M. Aebi, HR-MAS NMR



- reveals a pH-dependent LPS alteration by de-O-acetylation at abequose in the O-antigen of *Salmonella enterica* serovar Typhimurium. *Carbohydr. Res.* **382**, 58–64 (2013).
28. E. Hauser, E. Junker, R. Helmuth, B. Malorny, Different mutations in the *oafA* gene lead to loss of O5-antigen expression in *Salmonella enterica* serovar Typhimurium. *J. Appl. Microbiol.* **110**, 248–53 (2011).
29. Y. Nakai, A. Ito, Y. Ogawa, S. D. Aribam, M. Elsheimer-Matulova, K. Shiraiwa, S. M. B. Kisaka, H. Hikono, S. Nishikawa, M. Akiba, K. Kawahara, Y. Shimoji, M. Eguchi, Determination of O:4 antigen-antibody affinity level in O:5 antigen positive and negative variants of *Salmonella enterica* serovar Typhimurium. *FEMS Microbiol. Lett.* **364** (2017), doi:10.1093/femsle/fnx062.
30. M. Bichara, J. Wagner, I. B. Lambert, Mechanisms of tandem repeat instability in bacteria. *Mutat. Res. Mol. Mech. Mutagen.* **598**, 144–163 (2006).
31. L. M. Bogomolnaya, C. A. Santiviago, H.-J. Yang, A. J. Baumler, H. L. Andrews-Polymenis, “Form variation” of the O12 antigen is critical for persistence of *Salmonella* Typhimurium in the murine intestine. *Mol. Microbiol.* **70**, 1105–19 (2008).
32. E. Kintz, C. Heiss, I. Black, N. Donohue, N. Brown, M. R. Davies, P. Azadi, S. Baker, P. M. Kaye, M. van der Woude, *Salmonella enterica* Serovar Typhi Lipopolysaccharide O-Antigen Modification Impact on Serum Resistance and Antibody Recognition. *Infect. Immun.* **85** (2017), doi:10.1128/IAI.01021-16.
33. H. Brussow, C. Canchaya, W.-D. Hardt, Phages and the Evolution of Bacterial Pathogens: from Genomic Rearrangements to Lysogenic Conversion. *Microbiol. Mol. Biol. Rev.* **68**, 560–602 (2004).
34. I. Szabo, M. Grafe, N. Kemper, E. Junker, B. Malorny, Genetic basis for loss of immuno-reactive O-chain in *Salmonella enterica* serovar Enteritidis veterinary isolates. *Vet. Microbiol.* **204**, 165–173 (2017).
35. I. Cota, M. A. Sánchez-Romero, S. B. Hernández, M. G. Pucciarelli, F. García-Del Portillo, J. Casadesús, Epigenetic Control of *Salmonella enterica* O-Antigen Chain Length: A Tradeoff between Virulence and Bacteriophage Resistance. *PLoS Genet.* **11**, e1005667 (2015).
36. E. R. Rojas, G. Billings, P. D. Odermatt, G. K. Auer, L. Zhu, A. Miguel, F. Chang, D. B. Weibel, J. A. Theriot, K. C. Huang, The outer membrane is an essential load-bearing element in Gram-negative bacteria. *Nature.* **559**, 617–621 (2018).
37. G. L. Murray, S. R. Attridge, R. Morona, Altering the length of the lipopolysaccharide O antigen has an impact on the interaction of *Salmonella enterica* serovar Typhimurium with macrophages and complement. *J. Bacteriol.* **188**, 2735–9 (2006).
38. A. Varki, R. D. Cummings, M. Aebi, N. H. Packer, P. H. Seeberger, J. D. Esko, P. Stanley, G. Hart, A. Darvill, T. Kinoshita, J. J. Prestegard, R. L. Schnaar, H. H. Freeze, J. D. Marth, C. R. Bertozzi, M. E. Etzler, M. Frank, J. F. Vliegenthart, T. Lütke, S. Perez, E. Bolton, P. Rudd, J. Paulson, M. Kanehisa, P. Toukach, K. F. Aoki-Kinoshita, A. Dell, H. Narimatsu, W. York, N. Taniguchi, S. Kornfeld, Symbol Nomenclature for Graphical Representations of Glycans. *Glycobiology.* **25**, 1323–1324 (2015).
39. G. R. Harriman, M. Bogue, P. Rogers, M. Finegold, S. Pacheco, A. Bradley, Y. Zhang, I. N. Mbawuike, Targeted deletion of the IgA constant region in mice leads to IgA deficiency with alterations in expression of other Ig isotypes. *J. Immunol.* **162**, 2521–9 (1999).
40. H. Gu, Y. R. Zou, K. Rajewsky, Independent control of immunoglobulin switch recombination at individual switch regions evidenced through Cre-loxP-mediated gene targeting. *Cell.* **73**, 1155–64 (1993).
41. P. Mombaerts, J. Iacomini, R. S. Johnson, K. Herrup, S. Tonegawa, V. E. Papaioannou, RAG-1-deficient mice have no mature B and T lymphocytes. *Cell.* **68**, 869–77 (1992).
42. K. A. Datsenko, B. L. Wanner, One-step inactivation of chromosomal genes in *Escherichia coli* K-12 using PCR products. *Proc. Natl. Acad. Sci.* **97**, 6640–6645

- (2000).
43. N. L. Sternberg, R. Maurer, Bacteriophage-mediated generalized transduction in *Escherichia coli* and *Salmonella typhimurium*. *Methods Enzymol.* **204**, 18–43 (1991).
44. B. Stecher, S. Hapfelmeier, C. Muller, M. Kremer, T. Stallmach, W.-D. Hardt, Flagella and Chemotaxis Are Required for Efficient Induction of *Salmonella enterica* Serovar Typhimurium Colitis in Streptomycin-Pretreated Mice. *Infect. Immun.* **72**, 4138–4150 (2004).
45. A. M. Bolger, M. Lohse, B. Usadel, Trimmomatic: a flexible trimmer for Illumina sequence data. *Bioinformatics.* **30**, 2114–2120 (2014).
46. H. Li, R. Durbin, Fast and accurate short read alignment with Burrows-Wheeler transform. *Bioinformatics.* **25**, 1754–1760 (2009).
47. B. J. Walker, T. Abeel, T. Shea, M. Priest, A. Abouelliel, S. Sakthikumar, C. A. Cuomo, Q. Zeng, J. Wortman, S. K. Young, A. M. Earl, Pilon: an integrated tool for comprehensive microbial variant detection and genome assembly improvement. *PLoS One.* **9**, e112963 (2014).
48. P. Cingolani, A. Platts, L. L. Wang, M. Coon, T. Nguyen, L. Wang, S. J. Land, X. Lu, D. M. Ruden, A program for annotating and predicting the effects of single nucleotide polymorphisms, SnpEff: SNPs in the genome of *Drosophila melanogaster* strain w1118; iso-2; iso-3. *Fly (Austin).* **6**, 80–92 (2012).
49. K. Moor, S. Y. Wotzka, A. Toska, M. Diard, S. Hapfelmeier, E. Slack, Peracetic Acid Treatment Generates Potent Inactivated Oral Vaccines from a Broad Range of Culturable Bacterial Species. *Front. Immunol.* **7** (2016), doi:10.3389/fimmu.2016.00034.
50. M. Barthel, S. Hapfelmeier, L. Quintanilla-Martínez, M. Kremer, M. Rohde, M. Hogardt, K. Pfeffer, H. Rüssmann, W.-D. Hardt, Pretreatment of mice with streptomycin provides a *Salmonella enterica* serovar Typhimurium colitis model that allows analysis of both pathogen and host. *Infect. Immun.* **71**, 2839–58 (2003).
51. K. Moor, J. Fadlallah, A. Toska, D. Sterlin, M. L. Balmer, A. J. Macpherson, G. Gorochoy, M. Larsen, E. Slack, Analysis of bacterial-surface-specific antibodies in body fluids using bacterial flow cytometry. *Nat. Protoc.* **11**, 1531–1553 (2016).
52. M. Arnoldini, I. A. Vizcarra, R. Peña-Miller, N. Stocker, M. Diard, V. Vogel, R. E. Beardmore, W.-D. Hardt, M. Ackermann, Bistable expression of virulence genes in *salmonella* leads to the formation of an antibiotic-tolerant subpopulation. *PLoS Biol.* **12**, e1001928 (2014).
53. S. van Vliet, A. Dal Co, A. R. Winkler, S. Spriewald, B. Stecher, M. Ackermann, Spatially Correlated Gene Expression in Bacterial Groups: The Role of Lineage History, Spatial Gradients, and Cell-Cell Interactions. *Cell Syst.* **6**, 496-507.e6 (2018).
54. O. Westphal, K. Jann, Bacterial Lipopolysaccharides Extraction with Phenol-Water and Further Applications of the Procedure. *Methods Carbohydr. Chem.* **5**, 83–91 (1965).
55. T. Steffens, K. Duda, B. Lindner, F.-J. Vorhölter, H. Bednarz, K. Niehaus, O. Holst, The lipopolysaccharide of the crop pathogen *Xanthomonas translucens* pv. *translucens*: chemical characterization and determination of signaling events in plant cells. *Glycobiology.* **27**, 264–274 (2017).
56. S. Ardisson, P. Redder, G. Russo, A. Frandi, C. Fumeaux, A. Patrignani, R. Schlappbach, L. Falquet, P. H. Viollier, Cell Cycle Constraints and Environmental Control of Local DNA Hypomethylation in  $\alpha$ -Proteobacteria. *PLoS Genet.* **12**, e1006499 (2016).
57. H. Li, A statistical framework for SNP calling, mutation discovery, association mapping and population genetical parameter estimation from sequencing data. *Bioinformatics.* **27**, 2987–93 (2011).
58. D. W. Barnett, E. K. Garrison, A. R. Quinlan, M. P. Strömberg, G. T. Marth, BamTools: a C++ API and toolkit for analyzing and managing BAM files. *Bioinformatics.* **27**, 1691–2 (2011).
59. A. R. Quinlan, I. M. Hall, BEDTools: a flexible suite of utilities for comparing

- genomic features. *Bioinformatics*. **26**, 841–2 (2010).
60. P. J. Kersey, J. E. Allen, I. Armean, S. Boddu, B. J. Bolt, D. Carvalho-Silva, M. Christensen, P. Davis, L. J. Falin, C. Grabmueller, J. Humphrey, A. Kerhornou, J. Khobova, N. K. Aranganathan, N. Langridge, E. Lowy, M. D. McDowall, U. Maheswari, M. Nuhn, C. K. Ong, B. Overduin, M. Paulini, H. Pedro, E. Perry, G. Spudich, E. Tapanari, B. Walts, G. Williams, M. Tello–Ruiz, J. Stein, S. Wei, D. Ware, D. M. Bolser, K. L. Howe, E. Kulesha, D. Lawson, G. Maslen, D. M. Staines, Ensembl Genomes 2016: more genomes, more complexity. *Nucleic Acids Res.* **44**, D574–D580 (2016).
61. M. RStudio, Inc., Boston, RStudio: Integrated Development for R, (available at <https://www.rstudio.com/>).
62. R: A Language and Environment for Statistical Computing. R Foundation for Statistical Computing, (available at <https://www.r-project.org/about.html>).
63. M. I. Love, W. Huber, S. Anders, Moderated estimation of fold change and dispersion for RNA-seq data with DESeq2. *Genome Biol.* **15**, 550 (2014).
64. H. Yamashita, A. Taoka, T. Uchihashi, T. Asano, T. Ando, Y. Fukumori, Single-Molecule Imaging on Living Bacterial Cell Surface by High-Speed AFM. *J. Mol. Biol.* **422**, 300–309 (2012).
65. M. Hoffmann, T. Muruvanda, M. W. Allard, J. Korlach, R. J. Roberts, R. Timme, J. Payne, P. F. McDermott, P. Evans, J. Meng, E. W. Brown, S. Zhao, Complete Genome Sequence of a Multidrug-Resistant *Salmonella enterica* Serovar Typhimurium var. 5- Strain Isolated from Chicken Breast. *Genome Announc.* **1** (2013), doi:10.1128/genomeA.01068-13.
66. C. Silva, E. Calva, J. L. Puente, M. B. Zaidi, P. Vinuesa, Complete Genome Sequence of *Salmonella enterica* Serovar Typhimurium Strain SO2 (Sequence Type 302) Isolated from an Asymptomatic Child in Mexico. *Genome Announc.* **4** (2016), doi:10.1128/genomeA.00253-16.
67. Y. Hong, M. A. Liu, P. R. Reeves, Progress in Our Understanding of Wzx Flippase for Translocation of Bacterial Membrane Lipid-Linked Oligosaccharide. *J. Bacteriol.* **200**, e00154-17 (2018).
68. S. K. Hoiseth, B. A. D. Stocker, Aromatic-dependent *Salmonella typhimurium* are non-virulent and effective as live vaccines. *Nature*. **291**, 238–239 (1981).
69. S. Hapfelmeier, B. Stecher, M. Barthel, M. Kremer, A. J. Müller, M. Heikenwalder, T. Stallmach, M. Hensel, K. Pfeffer, S. Akira, W.-D. Hardt, The *Salmonella* Pathogenicity Island (SPI)-2 and SPI-1 Type III Secretion Systems Allow *Salmonella* Serovar *typhimurium* to Trigger Colitis via MyD88-Dependent and MyD88-Independent Mechanisms. *J. Immunol.* **174**, 1675–1685 (2005).

## **Acknowledgements**

OH acknowledges Heiko Käbner for recording NMR spectra, Regina Engel for GLC-MS, and Katharina Jakob and Sylvia Düpow for technical support. We want to thank Magdalena Schneider, Christine Kiessling, Elisabeth Schultheiss, Rosa-Maria Vesco and Clarisse Straub for the DNA extraction, library preparations and sequencing of the bacterial isolates. MD acknowledges Delphine Cornillet for serum resistance measurements.

## **Funding**

MD is supported by a SNF professorship (PP00PP\_176954). ES acknowledges the support of the Swiss National Science Foundation (40B2-0\_180953, 310030\_185128) and Gebert Rűf Microbials (GR073\_17). BMS acknowledges the support of R01 AI041239/AI/NIAID NIH HHS/United States. WDH acknowledges support by grants from the Swiss National Science Foundation (SNF; 310030B-173338), the Promedica Foundation, Chur and the Helmut Horten Foundation. EB is supported by a Boehringer Ingelheim Fonds PhD fellowship. BM acknowledges support by the Swiss National Science Foundation (200020\_159707).

## **Author contributions**

MD, WDH and ES designed the project and wrote the paper. MD and ES designed and carried out experiments. MvdW, BHM, RM contributed to experimental design / data interpretation. EB, DH, VL FB, KSM, AH, JA, PV, LV, DW, FB, AE, GZ, OH, MA carried out analyses shown in Fig1-4 and S1-S9. ND produced strains 891 and 931. LP, AL and BMS generated novel antibody reagents. All authors critically reviewed the manuscript.

## **Conflict of Interest**

The authors declare that Evolutionary Trap Vaccines are covered by European patent application EP19177251.

## **Data and materials availability**

All data and materials are in the manuscript or will be provided on request to the corresponding authors.

## **List of Supplementary Materials:**

- Materials and Methods
- Supplementary Figures S1-11
- Supplementary Table S1-3
- Supplementary Movies 1 and 2

## Figures 1-4

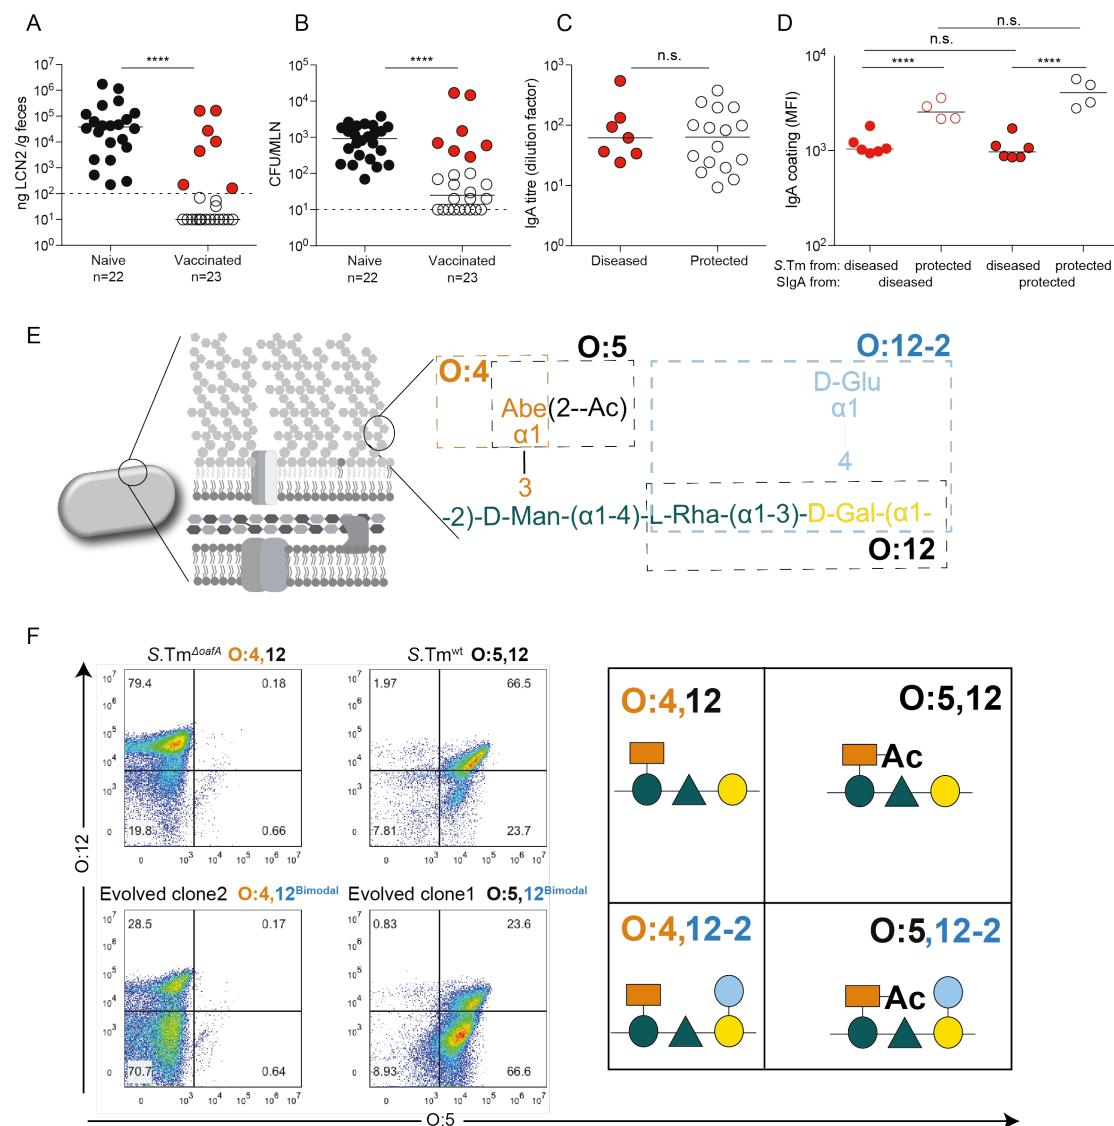

**Figure 1: IgA-escape by O-antigen modification:** A-C: Naive or PA-*S.Tm*-vaccinated (Vaccinated) mice were streptomycin-pretreated, infected ( $10^5$  *S.Tm*<sup>wt</sup> Colony forming units (CFU) per os) and analyzed 18 h later. **A.** Fecal Lipocalin 2 (LCN2) to quantify intestinal inflammation, **B.** Pathogen loads (CFU) in mesenteric lymph nodes (MLN), **C.** Intestinal IgA titres against *S.Tm*<sup>wt</sup> determined by flow cytometry, for vaccinated mice with LCN2 values below (open symbols, protected) and above (filled symbols, diseased) 100ng/g.  $p=0.61$  by Mann Whitney U test. **D.** Mice vaccinated and infected as in A-C. Ability of intestinal lavage IgA from diseased vaccinated mouse (red borders) or a protected vaccinated mouse (black borders) to recognize *S.Tm* clones re-isolated from the feces of the diseased mouse (red filled circles) or protected mouse (open circles) at day 3 post-infection. 2-way ANOVA with Bonferroni post-tests. **E.** Schematic of the O-antigen of *S.Tm* (O:5,12), and its common variants (O:4,12\_2), coloured to correspond to the "Symbol Nomenclature for Glycans". **F.** Overnight cultures of the indicated *S.Tm* strains and evolved clones arising during infections with *S.Tm*<sup>wt</sup> were stained with anti-O:5 and anti-O:12 antibodies, followed by fluorescent secondary reagents. Representative flow cytometry analyses of the different O-antigen types, and the "Symbol Nomenclature for Graphical Representations of Glycans"(38) representation of the O-antigen repeat structure present on *S.Tm* in each quadrant of the flow cytometry plots.



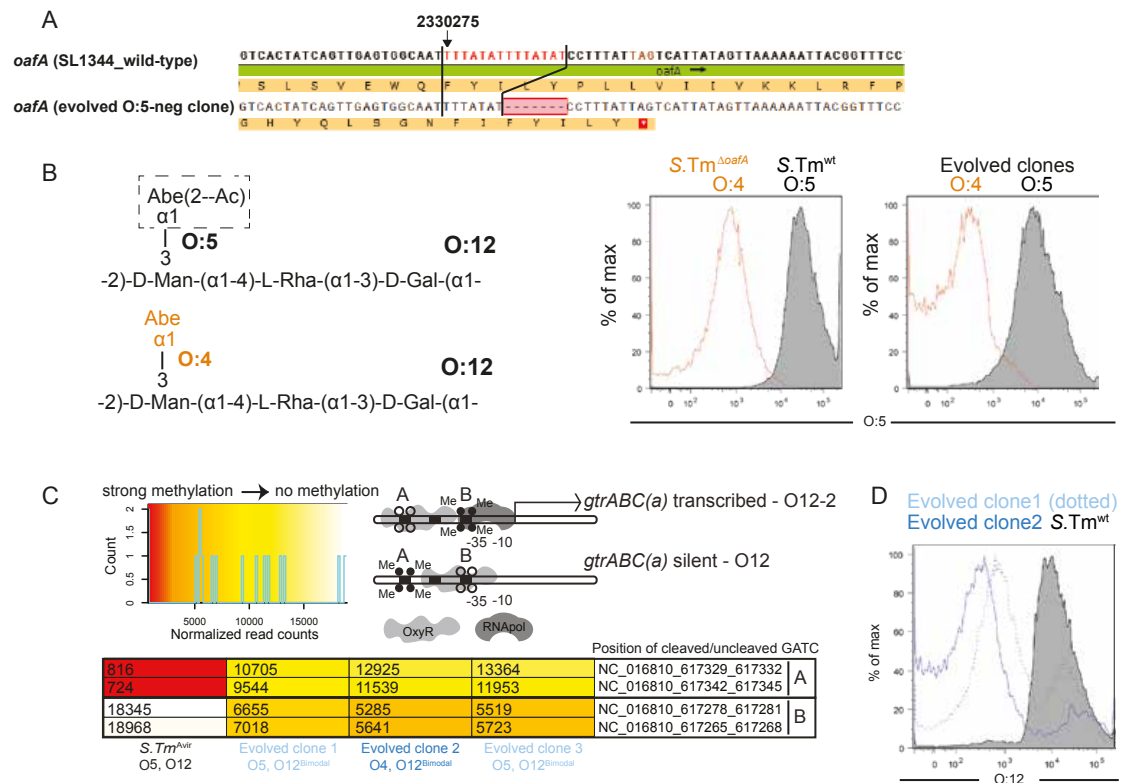

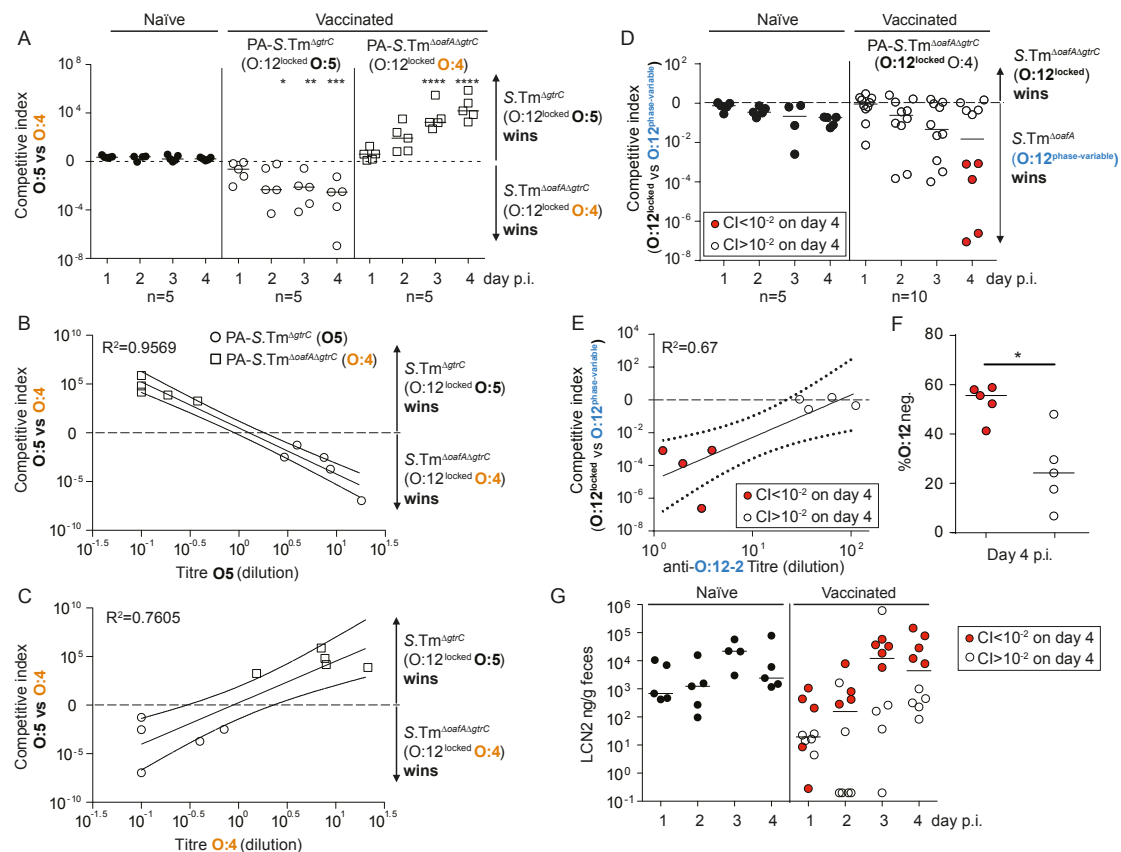

**Figure 3: O-antigen modification confers a selective advantage in the presence of vaccine-induced IgA:** **A-C.** Naive (closed circles), PA-S.Tm<sup>ΔgrC</sup>-vaccinated (O:5-vaccinated, open circles) and PA-S.Tm<sup>ΔgrC ΔoafA</sup>-vaccinated (O:4-vaccinated, open squares) mice were streptomycin-pretreated, infected (10<sup>5</sup> CFU, 1:1 ratio of *S.Tm*<sup>ΔgrC</sup> and *S.Tm*<sup>ΔgrC ΔoafA</sup> per os). **A.** Competitive index (CFU *S.Tm*<sup>ΔgrC</sup>/CFU *S.Tm*<sup>ΔgrC ΔoafA</sup>) in feces at the indicated time-points. 2-way ANOVA with Bonferroni post-tests on log-normalized values, compared to naive mice. \*p<0.05, \*\*p<0.01, \*\*\*p<0.001, \*\*\*\*p<0.0001. **B and C.** Correlation of the competitive index with the O:5-specific (**B**) and O:4-specific (**C**) intestinal IgA titre, r<sup>2</sup> values of the linear regression of log-normalized values. Open circles: Intestinal IgA from O:5-vaccinated mice, Open squares: Intestinal IgA from O:4-vaccinated mice. Lines indicate the best fit with 95% confidence interval **D-G.** Naive (closed circles) or PA-S.Tm<sup>ΔoafA ΔgrC</sup>-vaccinated (O:4/O:12-vaccinated, open circles and red circles) mice were streptomycin-pretreated and infected (10<sup>5</sup> CFU, 1:1 ratio of *S.Tm*<sup>ΔoafA</sup> (O:12-2 switching) and *S.Tm*<sup>ΔoafA ΔgrC</sup> (O:12-locked) per os). **D.** Competitive index (CFU *S.Tm*<sup>ΔoafA ΔgrC</sup>/CFU *S.Tm*<sup>ΔoafA</sup>) in feces at the indicated time-points. Red circles indicate vaccinated mice with a competitive index of below 10<sup>-2</sup> and are used to identify these animals in panels **D-G.** Effect of vaccination is not significant by 2-way ANOVA considering vaccination over time. **E.** Correlation of the competitive index on day 4 with the intestinal IgA titre against an O:12-2-locked *S.Tm* *pgtrABC* variant (linear regression of log-normalized values, lines indicate the best fit with 95% confidence interval). **F.** Enrichment cultures of the fecal *S.Tm*<sup>ΔoafA</sup> population at day 4 were stained for O:12/O:4 and the fraction of O:12-negative *S.Tm* quantified by flow cytometry. **G.** Intestinal inflammation quantified by Fecal Lipocalin 2 (LCN2).

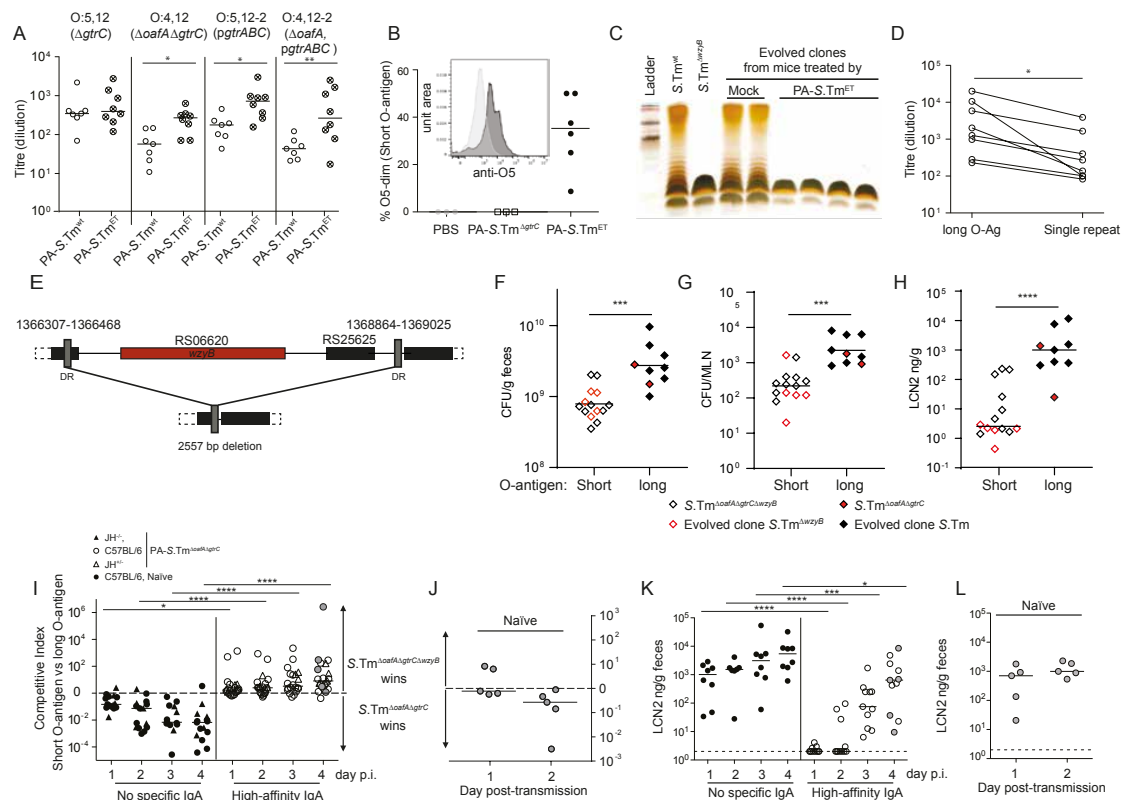

**Figure 4: Vaccines combining fitness-neutral glycan variants set an evolutionary trap for *S.Tm*, selecting for strains with a single-repeat O-antigen:** **A and B.** *S.Tm* clones re-isolated from the feces of mice vaccinated with PBS only, PA-*S.Tm*<sup>ΔgrtC</sup> or PA-*S.Tm*<sup>ET</sup> (combined PA-*S.Tm*<sup>ΔgrtC</sup>, PA-*S.Tm*<sup>ΔoafAΔgrtC</sup>, PA-*S.Tm* *pgtrABC*, and PA-*S.Tm*<sup>ΔoafA</sup> *pgtrABC*). **A.** Intestinal IgA titre, determined by bacterial flow cytometry against *S.Tm*<sup>ΔgrtC</sup> (O:5,12), *S.Tm*<sup>ΔoafAΔgrtC</sup> (O:4,12), *S.Tm*<sup>ΔgrtC</sup> *pgtrABC* (O:5, 12-2) and *S.Tm*<sup>ΔoafAΔgrtC</sup> *pgtrABC* (O:4,12-2). **B.** Fraction of clones with weak anti-sera staining, as determined by flow cytometry, indicative of O-antigen shortening. One point represents one mouse. **C.** Silver-stained gel of LPS from control and evolved *S.Tm* strains from control and PA-*S.Tm*<sup>ET</sup> vaccinated mice, showing short LPS in clones isolated from vaccinated PA-*S.Tm*<sup>ET</sup> mice. **D.** Intestinal IgA titre from PA-*S.Tm*<sup>ΔoafAΔgrtC</sup>-vaccinated mice specific for *S.Tm*<sup>ΔoafAΔgrtC</sup> (long O-antigen) and *S.Tm*<sup>ΔoafAΔgrtCΔwzyB</sup> (short O-antigen). **E.** Resequencing of strains with short O-antigen reveals a large genomic deletion between inverted repeats, covering the *wzyB* gene (O-antigen polymerase) n=5 clones sequenced. **F, G, H,** Single 24h infections in streptomycin pretreated naïve mice. Evolved and synthetic *wzyB* mutants have reduced ability to colonize the gut (**F**, CFU/g feces) and to spread systemically (**G**, CFU per mesenteric lymph node (MLN)). This translates into diminished propensity to trigger intestinal inflammation in comparison to *wzyB* wild type strains (**H**, fecal Lipocalin 2 (LCN2)). **I.** Mock-vaccinated wild type (C57BL/6, mock), PA-*S.Tm*<sup>ΔoafAΔgrtC</sup>-vaccinated JH<sup>-/-</sup> mice (JH<sup>-/-</sup>, Vacc), PA-*S.Tm*<sup>ΔoafAΔgrtC</sup>-vaccinated wild type (C57BL/6, Vacc) and PA-*S.Tm*<sup>ΔoafAΔgrtC</sup>-vaccinated JH<sup>+/-</sup> littermate controls (JH<sup>+/-</sup>, Vacc) mice were streptomycin pre-treated and infected with 10<sup>5</sup> CFU of a 1:1 ratio *S.Tm*<sup>ΔoafAΔgrtCΔwzyB</sup> and *S.Tm*<sup>ΔoafAΔgrtC</sup>. i.e. serotype-locked, short and long O-antigen-producing strains. Competitive index of *S.Tm* in feces on the indicated days. **J.** Feces from the indicated mice (grey-filled circles) from panel **I** were transferred into streptomycin-pretreated naïve mice (one fecal pellet per mouse) and competitive index in feces calculated to day 2 post-infection. **K and L.** Fecal Lipocalin 2 (LCN2) corresponding to panels **I** and **J** respectively. **A, I, K.** 2-way ANOVA on log-Normalized data. Bonferroni post-test statistics are shown. In panel **I**, competitive index in vaccinated mice is significantly higher than 1 at all time-points by Wilcoxon signed rank tests. **D, F, G, H:** Mann-Whitney U 2-tailed tests.

# Supplementary Materials

## Materials and methods:

### Ethics statement

All animal experiments were approved by the legal authorities (licenses 223/2010, 222/2013 and 193/2016; Kantonales Veterinäramt Zürich, Switzerland) and performed according to the legal and ethical requirements.

### Mice

Unless otherwise stated, all experiments used SOPF C57BL/6 mice. 129S1/SvImJ, IgA<sup>-/-</sup> [(39)], JH<sup>-/-</sup> [(40)], Rag1<sup>-/-</sup> [(41)] (all C57BL/6 background) were re-derived into a specific opportunistic pathogen-free (SOPF) foster colony to normalize the microbiota and bred under full barrier conditions in individually ventilated cages in the ETH Phenomics center (EPIC, RCHCI), ETH Zürich. Low complex microbiota (LCM) mice (C57BL/6) are ex-germfree mice, which were colonized with a naturally diversified Altered Schaedler flora in 2007(10) and were bred in individually ventilated cages or flexible-film isolators at this facility. Vaccinations were started between 5 and 6 weeks of age, and males and females were randomized between groups to obtain identical ratios wherever possible. As strong phenotypes were expected, we adhered to standard practice of analysing at least 5 mice per group. Researchers were not blinded to group allocation.

### Strains and plasmids

All strains and plasmids used in this study are listed **Table S1**.

For cultivation of bacteria, we used lysogeny broth (LB) containing appropriate antibiotics (i.e., 50 µg/ml streptomycin (AppliChem); 6 µg/ml chloramphenicol (AppliChem); 50 µg/ml kanamycin (AppliChem); 100 µg/ml ampicillin (AppliChem)). Dilutions were prepared in Phosphate Buffer Saline (PBS, Difco)

In-frame deletion mutants (e.g. *gtrC::cat*) were performed by  $\lambda$  red recombination as described in(42). When needed, antibiotic resistance cassettes were removed using the temperature-inducible FLP recombinase encoded on pCP20(42). Mutations coupled with antibiotic resistance cassettes were transferred into the relevant genetic background by generalized transduction with bacteriophage P22 HT105/1 *int-201*(43). Primers used for genetic manipulations and verifications of the constructions are listed **Table S2**. Deletions of *gtrA* and *gtrC* originated from in-frame deletions made in *S.Tm* 14028S, kind gifts from Prof. Michael McClelland (University of California, Irvine), and were transduced into the SB300 genetic background.

The *gtrABC* operon (STM0557-0559) was cloned into the pSC101 derivative plasmid pM965(44). The operon *gtrABC* was amplified from the chromosome of SB300 using the Phusion Polymerase (ThermoFisher Scientific) and primers listed **Table S2**. The PCR product and pM965 were digested with PstI-HF and EcoRV-HF (NEB) before kit purification (SV Gel and PCR Clean up System, Promega) and ligation in presence of T4 ligase (NEB) following manufacturer recommendations. The ligation product was transferred by electro-transformation in competent SB300 cells.

### Targeted sequencing

Targeted re-sequencing by the Sanger method (Microsynth AG) was performed on kit purified PCR products (Promega) from chromosomal DNA or expression vector templates using pre-mixed sequencing primers listed **Table S2**.

### **Whole-genome re-sequencing of O:12<sup>Bimodal</sup> isolates**

The genomes of S.Tm and evolved derivatives were fully sequenced by the Miseq system (2x300bp reads, Illumina, San Diego, CA) operated at the Functional Genomic Center in Zurich. The sequence of S.Tm SL1344 (NC\_016810.1) was used as reference. Quality check, reads trimming, alignments, SNPs and indels calling were performed using the bioinformatics software CLC Workbench (Qiagen).

### **Whole-genome sequencing of S.Tm isolates from "Evolutionary trap" vaccinated mice and variant calling.**

Nextera XT libraries were prepared for each of the samples. The barcoded libraries were pooled into equimolar concentrations following manufacturer's guidelines (Illumina, San Diego, CA) using the Mid-Output Kit for paired-end sequencing (2x150 bp) on an Illumina NextSeq500 sequencing platform. Raw data (mean virtual coverage 361x) was demultiplexed and subsequently clipped of adapters using Trimmomatic v0.38 with default parameters(45). Quality control passing read-pairs were aligned against reference genome/plasmids (Accession numbers: NC\_016810.1, NC\_017718.1, NC\_017719.1, NC\_017720.1) with bwa v0.7.17(46). Genomic variant were called using Pilon v1.23(47). with the following parameters: (i) minimum coverage 10x; (ii) minimum quality score = 20; (iii) minimum read mapping quality = 10. SnpEff v4.3 was used to annotate variants according to NCBI and predict their effect on genes(48).

### **PA-S.Tm vaccinations**

Peracetic acid killed vaccines were produced as previously described(49). Briefly, bacteria were grown overnight to late stationary phase, harvested by centrifugation and re-suspended to a density of  $10^9$ - $10^{10}$  per ml in sterile PBS. Peracetic acid (Sigma-Aldrich) was added to a final concentration of 0.4% v/v. The suspension was mixed thoroughly and incubated for 60 min at room temperature. Bacteria were washed once in 40 ml of sterile 10x PBS and subsequently three times in 50 ml sterile 1x PBS. The final pellet was re-suspended to yield a density of  $10^{11}$  particles per ml in sterile PBS (determined by OD600) and stored at 4°C for up to three weeks. As a quality control, each batch of vaccine was tested before use by inoculating 100 µl of the killed vaccine (one vaccine dose) into 300 ml LB and incubating over night at 37 °C with aeration. Vaccine lots were released for use only when a negative enrichment culture had been confirmed.

### **Non-typhoidal *Salmonella* challenge infections**

Infections were carried out as described(50). In order to allow reproducible gut colonization, 8-12 week-old C57Bl/6 mice, naïve or vaccinated, were orally pretreated 24 h before infection with 25 mg streptomycin. Strains were cultivated overnight separately in LB containing the appropriate antibiotics. Subcultures were prepared before infections by diluting overnight cultures 1:20 in fresh LB without antibiotics and incubation for 4 h at 37°C. The cells were washed in PBS and 50 µl of resuspended pellets were used to infect mice *per os* ( $5 \times 10^5$  CFU). Competitions were performed by inoculating 1:1 mixtures of each competitor strain.



Feces were sampled daily, homogenized in 1 ml PBS by bead beating (3mm steel ball, 25 Hz for 1 minute in a TissueLyser (Qiagen)), and *S.Tm* strains were enumerated by selective plating on MacConkey agar supplemented with the relevant antibiotics. Samples for lipocalin-2 measurements were kept homogenized in PBS at -20 °C. At endpoint, intestinal lavages were harvested by flushing the ileum content with 2 ml of PBS using a cannula. The mesenteric lymph nodes, were collected, homogenized in PBS Tergitol 0.05% v/v at 25 Hz for 2 minutes, and bacteria were enumerated by selective plating. Competitive indexes were calculated as the ratio of relative population sizes of competitors at a given time point, normalized for the ratio in the inoculum.

#### Non-typhoidal *Salmonella* transmission

Donor mice were vaccinated with PA-*S.Tm*<sup>ΔoafA ΔgtrC</sup> once per week for 5 weeks, streptomycin pretreated (25 mg streptomycin *per os*), and gavaged 24 hours later with 10<sup>5</sup> CFU of a 1:1 mixture of *S. Tm*<sup>ΔoafAΔgtrCwzyB::cat</sup> (Cm<sup>R</sup>) and *S. Tm*<sup>ΔoafAΔgtrC Kan</sup> (Kan<sup>R</sup>). On day 4 post infection, the donor mice were euthanized, organs were harvested, and fecal pellets were collected, weighed and homogenized in 1 ml of PBS. The re-suspended feces (centrifuged for 10 seconds to discard large debris) were immediately used to gavage (as a 50 μl volume containing the bacteria from on fecal pellet) recipient naïve mice (pretreated with 25 mg streptomycin 24 hours before infection). Recipient mice were euthanized and organs were collected on day 2 post transmission. In both donor and recipient mice, fecal pellets were collected daily and selective plating was used to enumerate *Salmonella* and determine the relative proportions (and consequently the competitive index) of both competing bacterial strains.

#### Quantification of fecal Lipocalin2

Fecal pellets collected at the indicated time-points were homogenized in PBS by bead-beating at 25 Hz, 1min. Large particles were sedimented by centrifugation at 300 g, 1min. The resulting supernatant was then analysed in serial dilution using the mouse Lipocalin2 ELISA duoset (R&D) according to the manufacturer's instructions.

#### Analysis of IgA-coating, and O:5/O:12 expression on *S.Tm* in cecal content

Fresh cecal content or feces was re-suspended in sterile PBS by bead-beating at 25 Hz, 1min (previously demonstrated to disrupt IgA cross-linked clumps(9)). An aliquot estimated to contain not more than 10<sup>6</sup> *S.Tm* was directly stained with a monoclonal human IgG-anti-O:12 (STA5(9)) and biotin-conjugated anti-mouse IgA clone RMA-1 (Biolegend), and/or Rabbit-anti-*Salmonella* O:5 (Difco). After washing, secondary reagents Alex647-anti-human IgG (Jackson ImmunoResearch), Pacific Blue-conjugated streptavidin (Molecular Probes), Phycoerythrin-conjugated streptavidin (Molecular Probes) and/or Brilliant violet 421-anti-Rabbit IgG (Biolegend) were added. After a final washing step, samples were analysed on a BD LSRII flow cytometer, or a Beckman Coulter Cytoflex S, with settings adapted for optimal detection of bacterial-sized particles. The median fluorescence intensity of IgA staining on *S.Tm* was determined by "gating" on bacterial sized particles and calculating the appropriate median fluorescence corresponding to O:12 or O:5 staining FlowJo (Treestar, USA). Gates used to calculate the % of "ON" and "OFF" cells were calculated by gating on samples with known ON or OFF phenotypes.

#### Analysis of specific antibody titers by bacterial flow cytometry

Specific antibody titers in mouse intestinal washes were measured by flow cytometry as described(9, 51). Briefly, intestinal washes were collected by flushing the small intestine with 5ml PBS, centrifuged at 16000 g for 30 min and aliquots of the supernatants were stored at -20°C until analysis. Bacterial targets (antigen against which antibodies are to be titrated) were grown to late stationary phase or the required OD, then gently pelleted for 2 min at 3000 g. The pellet was washed with sterile-filtered 1% BSA/PBS before re-suspending at a density of approximately  $10^7$  bacteria per ml. After thawing, intestinal washes were centrifuged again at 16000 g for 10 min. Supernatants were used to perform serial dilutions. 25 µl of the dilutions were incubated with 25 µl bacterial suspension at 4°C for 1h. Bacteria were washed twice with 200 µl 1% BSA/PBS before resuspending in 25 µl 1% BSA/PBS containing monoclonal FITC-anti-mouse IgA (BD Pharmingen, 10µg/ml) or Brilliant violet 421-anti-IgA (BD Pharmingen). After 1h of incubation, bacteria were washed once with 1% BSA/PBS and resuspended in 300µl 1% BSA/PBS for acquisition on LSRII or Beckman Coulter Cytoflex S using FSC and SSC parameters in logarithmic mode. Data were analysed using FloJo (Treestar). After gating on bacterial particles, log-median fluorescence intensities (MFI) were plotted against antibody concentrations for each sample and 4-parameter logistic curves were fitted using Prism (Graphpad, USA). Titers were calculated from these curves as the inverse of the antibody concentration giving an above-background signal.

#### **Flow cytometry for analysis of O:5, O:4 and O:12 epitope abundance on *Salmonella* in cecal content, enrichment cultures and clonal cultures**

1µl of overnight cultures, or 1µl of fresh feces or cecal content suspension (as above) was stained with STA5 (human recombinant monoclonal IgG2 anti-O:12(9)), Rabbit anti-*Salmonella* O:5 or Rabbit anti-*Salmonella* O:4. After incubation at 4°C for 30 min, bacteria were washed once with PBS/1% BSA and resuspended in appropriate secondary reagents (Alexa 647-anti-human IgG, Jackson ImmunoResearch, Brilliant Violet 421-anti-Rabbit IgG, Biolegend). This was incubated for 10-60 min before cells were washed and resuspended for acquisition on a BD LSRII or Beckman Coulter Cytoflex S.

#### **Live-cell immunofluorescence**

200 uL of an overnight culture was centrifuged and resuspended in 200 µL PBS containing 1 µg recombinant murine IgA clone STA121-AlexaFluor568. The cells and antibodies were co-incubated for 20 minutes at room temperature in the dark and then washed twice in 1 mL Lysogeny broth (LB). Antibody-labeled cells were pipetted into in-house fabricated microfluidic device(52). Cells in the microfluidic device were continuously fed S.Tm-conditioned LB(52) containing STA121-AlexaFluor568 (1 µg/mL). Media was flowed through the device at a flow rate of 0.2 mL/h using syringe pumps (NE-300, NewEra PumpSystems). Cells in the microfluidic device were imaged on an automated Olympus IX81 microscope enclosed in an incubation chamber heated to 37°C. At least 10 unique positions were monitored in parallel per experiment. Phase contrast and fluorescence images were acquired every 3 minutes. Images were deconvoluted in MatLab(53). Videos are compressed to 7 fps, i.e. 1 s = 21 mins.

#### **HR-MAS NMR**

*S. Typhimurium* cells were grown overnight (~18h) a to late stationary phase. The equivalent of 11–15 OD<sub>600</sub> was pelleted by centrifugation for 10 min 4 °C and 3750 g. The pellet was resuspended in 10% NaN<sub>3</sub> in potassium phosphate buffer (PPB; 10 mM pH 7.4) in D<sub>2</sub>O and

incubated at room temperature for at least 90 min. The cells were then washed twice with PPB and resuspended in PPB to a final concentration of 0.2 OD<sub>600</sub>/μl in PPB containing acetone (final concentration 0.1% (v/v) as internal reference. The samples were kept on ice until the NMR measurements were performed - i.e. for between 1 and 8 h. The HR-MAS NMR spectra were recorded in two batches, as follows: S.Tm<sup>WT</sup>, S.Tm<sup>wbaP</sup>, S.Tm<sup>Evolved\_1</sup>, S.Tm<sup>Evolved\_2</sup> were measured on 16.12.2016, S.Tm<sup>OafA</sup> was measured on 26.7.17.

NMR experiments on intact cells were carried out on a Bruker Biospin AVANCE III spectrometer operating at 600 MHz <sup>1</sup>H Larmor frequency using a 4 mm HR-MAS Bruker probe with 50 μl restricted-volume rotors. Spectra were collected at a temperature of 27 °C and a spinning frequency of 3 kHz except for the sample of OafA (25 °C, 2 kHz). The <sup>1</sup>H experiments were performed with a 24 ms Carr–Purcell–Meiboom–Gill (CPMG) pulse-sequence with rotor synchronous refocusing pulses every two rotor periods before acquisition of the last echo signal to remove broad lines due to solid-like material(27). The 90° pulse was set to 6.5 μs, the acquisition time was 1.36 s, the spectral width to 20 ppm. The signal of HDO was attenuated using water presaturation for 2 s. 400 scans were recorded in a total experimental time of about 30 minutes.

### **O-Antigen purification and <sup>1</sup>H-NMR**

The LPS was isolated applying the hot phenol-water method(54), followed by dialysis against distilled water until the phenol scent was gone. Then samples were treated with DNase (1mg/100 mg LPS) plus RNase (2 mg/100 mg LPS) at 37°C for 2 h, followed by Proteinase K treatment (1 mg/100 mg LPS) at 60°C for 1 h [all enzymes from Serva, Germany]. Subsequently, samples were dialyzed again for 2 more days, then freeze dried. Such LPS samples were then hydrolyzed with 1% aqueous acetic acid (100°C, 90 min) and ultra-centrifuged for 16 h at 4°C and 150,000 g. Resulting supernatants (the O-antigens) were dissolved in water and freeze-dried. For further purification, the crude O-antigen samples were chromatographed on TSK HW-40 eluted with pyridine/acetic acid/water (10/4/1000, by vol.), then lyophilized. On these samples, 1D and 2 D (COSY, TOCSY, HSQC, HMBC) <sup>1</sup>H- and <sup>13</sup>C-NMR spectra were recorded with a Bruker DRX Avance 700 MHz spectrometer (<sup>1</sup>H: 700.75 MHz; <sup>13</sup>C: 176.2 MHz) as described(55).

### **Atomic force microscopy**

The indicated S.Tm strains were grown to late-log phase, pelleted, washed once with distilled water to remove salt. A 20 μl of bacterial solution was deposited onto freshly cleaved mica, adsorbed for 1 min and dried under a clean airstream. The surface of bacteria was probed using a Dimension FastScan Bio microscope (Bruker) with Bruker AFM cantilevers in tapping mode under ambient conditions. The microscope was covered with an acoustic hood to minimized vibrational noise. AFM images were analyzed using the Nanoscope Analysis 1.5 software.

### **Methylation analysis of S.Tm clones**

For REC-Seq (restriction enzyme cleavage–sequencing) we followed the same procedure described by Ardisson et al, 2016(56). In brief, 1 μg of genomic DNA from each S.Tm was cleaved with MboI, a blocked (5'biotinylated) specific adaptor was ligated to the ends and the ligated fragments were then sheared to an average size of 150-400 bp (Fasteris SA, Geneva, CH). Illumina adaptors were then ligated to the sheared ends followed by deep-sequencing

using a HiSeq Illumina sequencer, the 50 bp single end reads were quality controlled with FastQC (<http://www.bioinformatics.babraham.ac.uk/projects/fastqc/>). To remove contaminating sequences, the reads were split according to the MboI consensus motif (5'-<sup>^</sup>GATC-3') considered as a barcode sequence using fastx\_toolkit ([http://hannonlab.cshl.edu/fastx\\_toolkit/](http://hannonlab.cshl.edu/fastx_toolkit/)) (fastx\_barcode\_splitter.pl --bcfile barcodelist.txt --bol --exact). A large part of the reads (60%) were rejected and 40% kept for remapping to the reference genomes with bwa mem(46) and samtools(57) to generate a sorted bam file. The bam file was further filtered to remove low mapping quality reads (keeping AS >= 45) and split by orientation (alignmentFlag 0 or 16) with bamtools(58). The reads were counted at 5' positions using Bedtools(59) (bedtools genomecov -d -5). Both orientation count files were combined into a bed file at each identified 5'-GATC-3' motif using a home-made PERL script. The MboI positions in the bed file were associated with the closest gene using Bedtools closest(59) and the gff3 file of the reference genomes(60). The final bed file was converted to an MS Excel sheet with a homemade script. The counts were loaded in RStudio 1.1.442(61) with R version 3.4.4(62) and analysed with the DESeq2 1.18.1 package(63) comparing the reference strain with the 3 evolved strains considered as replicates. The counts are analysed by genome position rather than by gene. The positions are considered significantly differentially methylated upon an adjusted p-value < 0.05. Of the 2607 GATC positions, only 4 were found significantly differentially methylated and they are all located in the promoter of the gtrABC operon.

#### ***gtrABC* expression analysis by blue/white screening and flow cytometry.**

About 200 colonies of *S.Tm*<sup>*gtrABC-lacZ*</sup> (strain background 4/74, (22)) were grown from an overnight culture on LB agar supplemented with X-gal (0.2 mg/ml, Sigma) in order to select for *gtrABC* ON (blue) and OFF clones (white). These colonies were then picked to start pure overnight cultures. These cultures were diluted and plated on fresh LB agar X-gal plate in order to enumerate the proportion of *gtrABC* ON and OFF siblings. The proportion of O:12/O:12-2 cells was analyzed by flow cytometry.

#### ***In vitro* growth and competitions to determine *wzyB*-associated fitness costs**

Single or 1:1 mixed LB subcultures were diluted 1000 times in 200 µl of media distributed in 96 well Black side microplates (Costar). Where appropriate, wild type *S.Tm* carried a plasmid for constitutive expression of GFP. To measure growth and competitions in stressful conditions that specifically destabilize the outer membrane of *S.Tm*, a mixture of Tris and EDTA (Sigma) was diluted to final concentration (4 mM Tris, 0.4 mM EDTA) in LB. The lid-closed microplates were incubated at 37°C with fast and continuous shaking in a microplate reader (Synergy H4, BioTek Instruments). The optical density was measured at 600 nm and the green fluorescence using 491 nm excitation and 512 nm emission filter wavelengths every 10 minutes for 18 h. The outcome of competitions was determined by calculating mean OD and fluorescence intensity measured during the last 100 min of incubation. OD and fluorescence values were corrected for the baseline value measured at time 0.

#### **Serum resistance**

Overnight LB cultures were washed three times in PBS, OD adjusted to 0.5 and incubated with pooled human serum obtained from Unispital Basel (3 vol of culture for 1 vol of serum) at 37°C for 1 h. Heat inactivated (56°C, 30 min) serum was used as control treatment.

Surviving bacteria were enumerated by plating on non-selective LB agar plates. For this, dilutions were prepared in PBS immediately after incubation.

### Modeling antigen switching between O12 and O12-2

The aim of this modeling approach is to test whether a constant switching rate between an O12 and an O12-2 antigen expression state can explain the experimentally observed bimodal populations.

To this end, we formulated a deterministic model of population dynamics of the two phenotypic states as

$$\begin{aligned}\frac{dO_{12}}{dt} &= (\mu O_{12} - s_{\rightarrow 12-2} O_{12} + s_{\rightarrow 12} O_{12-2}) * \left(1 - \frac{(O_{12} + O_{12-2})}{K}\right) \\ \frac{dO_{12-2}}{dt} &= (\mu O_{12-2} + s_{\rightarrow 12-2} O_{12} - s_{\rightarrow 12} O_{12-2}) * \left(1 - \frac{(O_{12} + O_{12-2})}{K}\right),\end{aligned}$$

where  $O_{12}$  and  $O_{12-2}$  denote the population sizes of the respective antigen variants,  $\mu$  denotes the growth rate, which is assumed to be identical for the two variants,  $K$  the carrying capacity, and  $s_{\rightarrow 12-2}$  and  $s_{\rightarrow 12}$  the respective switching rates from  $O_{12}$  to  $O_{12-2}$  and from  $O_{12-2}$  to  $O_{12}$ . Growth, as well as the antigen switching rates, are scaled with population size in a logistic way, so that all processes come to a halt when carrying capacity is reached.

We use the model to predict the composition of a population after growth in LB overnight, and therefore set the specific growth rate to  $\mu = 2.05h^{-1}$ , which corresponds to a doubling time of roughly 20min. The carrying capacity is set to  $K = 10^9$  cells. We ran parameter scans for the switching rates  $s_{\rightarrow 12}$  and  $s_{\rightarrow 12-2}$ , with population compositions that start either with 100% or 0%  $O_{12}$ , and measure the composition of the population after 16h of growth (**Fig. S4C**). The initial population size is set to  $10^4$  cells

Experimentally, we observe that when starting a culture with an  $O_{12}$  colony, after overnight growth the culture is composed of around 90%  $O_{12}$  and 10%  $O_{12-2}$  cells, whereas starting the culture with  $O_{12-2}$  cells yields around 50%  $O_{12}$  and 50%  $O_{12-2}$  cells after overnight growth (**Fig. S4B**). To explain this observation without a change in switching rates, we would need a combination of values in  $s_{\rightarrow 12}$  and  $s_{\rightarrow 12-2}$  that yield the correct population composition for both scenarios. In **Fig. S4D**, we plot the values of  $s_{\rightarrow 12}$  and  $s_{\rightarrow 12-2}$  that yield values of 10%  $O_{12-2}$  (starting with 0%  $O_{12-2}$ , green dots) and 50%  $O_{12-2}$  (starting with 100%  $O_{12-2}$ , orange dots). The point clusters intersect at  $s_{\rightarrow 12} = 0.144h^{-1}$  and  $s_{\rightarrow 12-2} = 0.037h^{-1}$  (as determined by a local linear regression at the intersection point).

We then used the thus determined switching rates to produce a population growth curve in a deterministic simulation, using the above equations for a cultures starting with 100%  $O_{12-2}$ , (**Fig. S4E**, Left-hand graph) and for a culture starting with 0%  $O_{12-2}$  (**Fig. S4E**, right-hand graph).

These switching rates are consistent with published values (22). Our results show that the observed phenotype distributions can be explained without a change in the rate of switching between the phenotypes.



# Key to O-glycan repeat structures in this manuscript

| Serovar         | Full Representation                                                                                                                                  | SNFG Representation |
|-----------------|------------------------------------------------------------------------------------------------------------------------------------------------------|---------------------|
| <b>O:5,12</b>   | <p><b>O:5</b></p> <p>Abe(2--Ac)<br/>α1<br/>3</p> <p>-2)-D-Man-(α1-4)-L-Rha-(α1-3)-D-Gal-(α1-</p> <p><b>O:12</b></p>                                  |                     |
| <b>O:4,12</b>   | <p><b>O:4</b> Abe<br/>α1<br/>3</p> <p>-2)-D-Man-(α1-4)-L-Rha-(α1-3)-D-Gal-(α1-</p> <p><b>O:12-2</b></p> <p>D-Glu<br/>α1<br/>4</p> <p><b>O:12</b></p> |                     |
| <b>O:5,12-2</b> | <p><b>O:5</b></p> <p>Abe(2--Ac)<br/>α1<br/>3</p> <p>-2)-D-Man-(α1-4)-L-Rha-(α1-3)-D-Gal-(α1-</p> <p><b>O:12-2</b></p> <p>D-Glu<br/>α1<br/>4</p>      |                     |
| <b>O:4,12-2</b> | <p><b>O:4</b> Abe<br/>α1<br/>3</p> <p>-2)-D-Man-(α1-4)-L-Rha-(α1-3)-D-Gal-(α1-</p> <p><b>O:12-2</b></p> <p>D-Glu<br/>α1<br/>4</p>                    |                     |

# Supplementary Figures 1 - 11

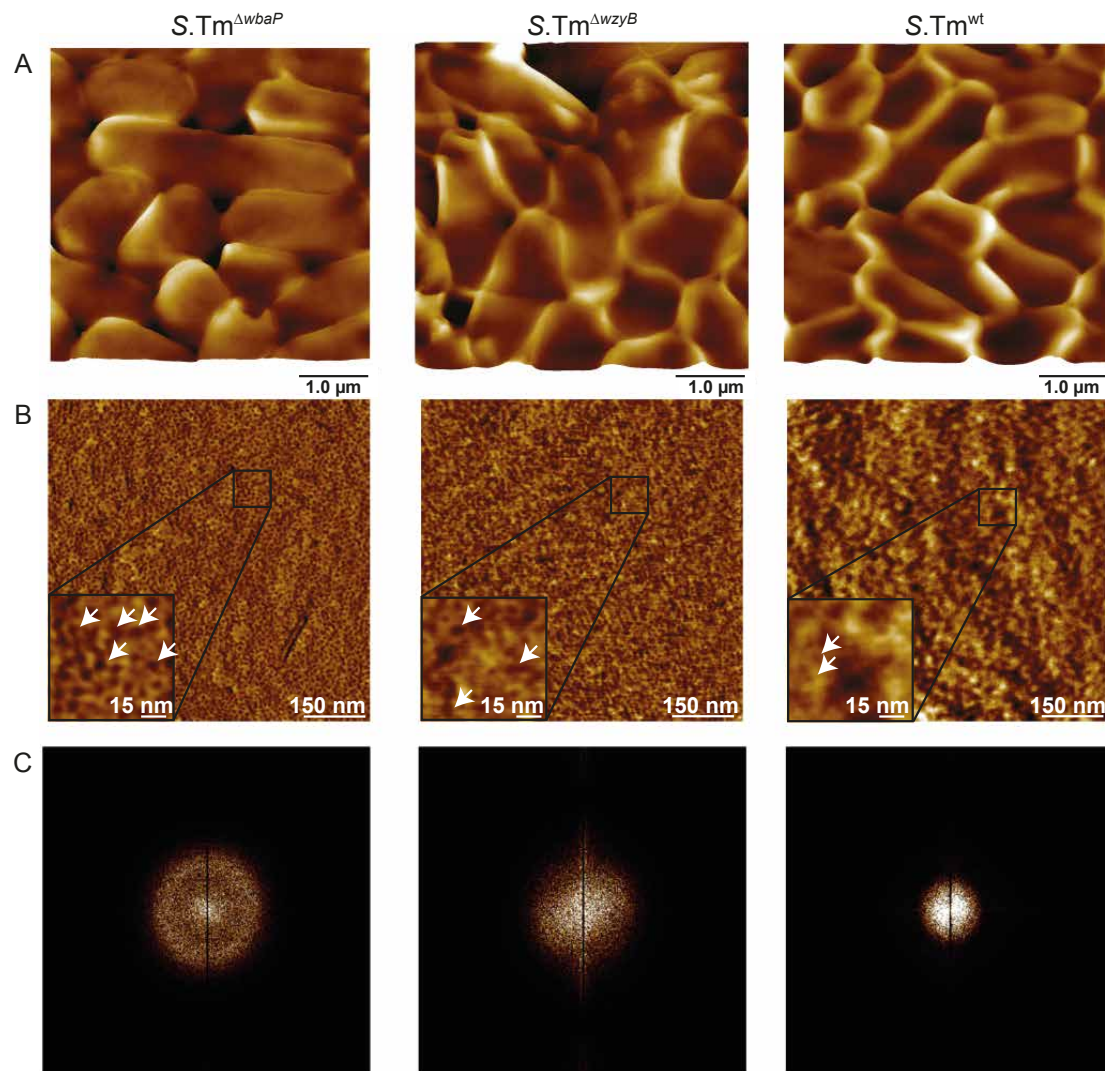

**Fig. S1: Surface phenotype of *S. Tm* mutants:** A-C. Atomic force microscopy phase images of *S. Tm*<sup>wt</sup>, *S. Tm*<sup>ΔwzyB</sup> (single-repeat O-antigen), and *S. Tm*<sup>ΔwbaP</sup> (rough mutant - no O-antigen) at low magnification (A) and high magnification (B and C). Invaginations in the surface of *S. Tm*<sup>ΔwbaP</sup> (dark colour, B) show a geometry and size consistent with outer membrane pores(64). These are already less clearly visible on the surface of *S. Tm*<sup>ΔwzyB</sup> with a single-repeat O-antigen, and become very difficult to discern in *S. Tm*<sup>wt</sup>. C. Fast-Fourier transform of images shown in "B" demonstrating clear regularity on the surface of *S. Tm*<sup>ΔwbaP</sup>, which is progressively lost when short and long O-antigen is present.

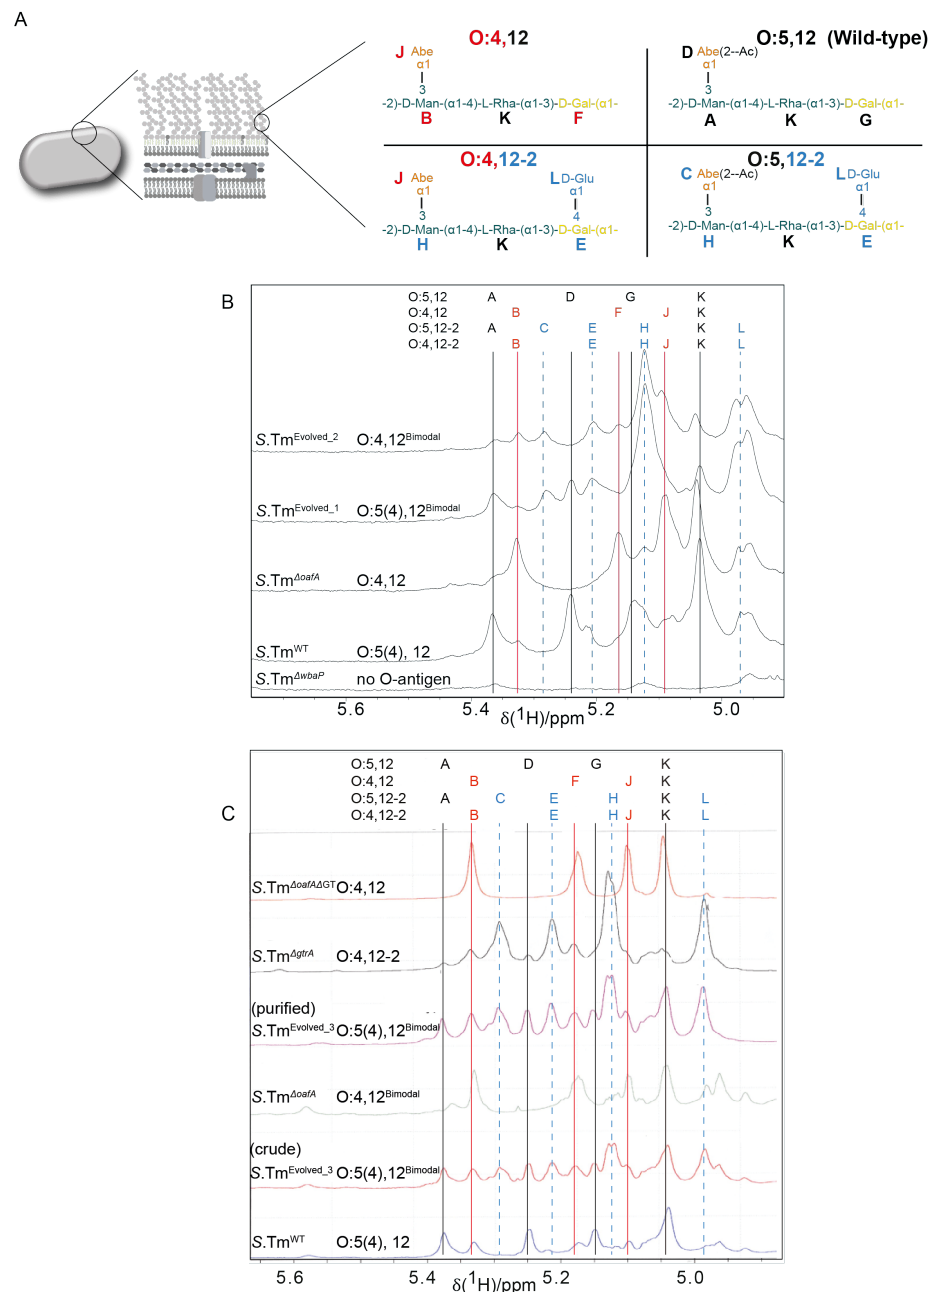

**Fig. S2: NMR of purified LPS from the indicated strains.** **A.** Schematic diagram of expected NMR peaks for each molecular species **B.** HR-MAS  $^1\text{H}$ -NMR spectra. Spectra show predicted peak positions, and observed spectra for C1 protons of the O-antigen sugars. **C.**  $^1\text{H}$  NMR of purified LPS from the indicated strains. Note that non-acetylated Abequose can be observed in wild-type strains due to spontaneous deacetylation at low pH in late stationary phase cultures(27). A *gtrA* mutant strain is used here to over-represent the O:12-2 O-antigen variant due to loss of regulation(31).

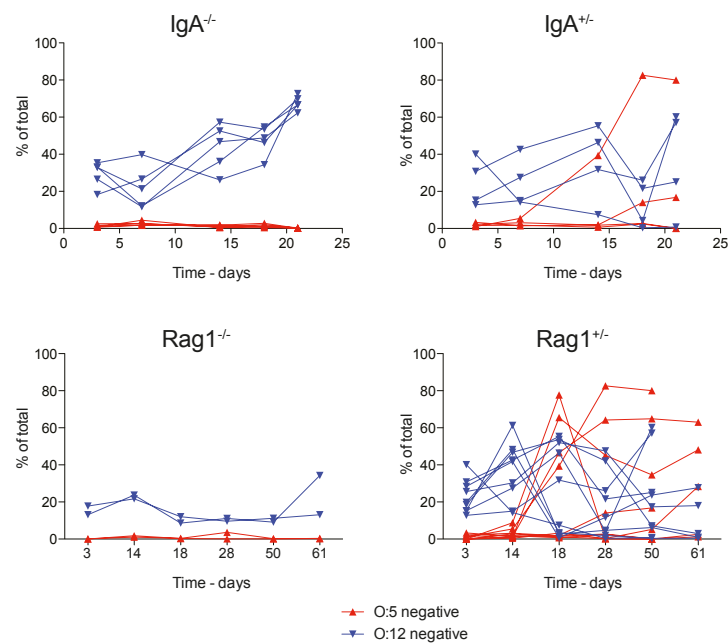

**Fig. S3: *S.Tm* O-antigen variation occurs in chronic *S.Tm* infections in an antibody-dependent manner.** IgA<sup>-/-</sup> and Rag1<sup>-/-</sup> and heterozygote littermate controls were pre-treated with streptomycin and infected with *S.Tm*<sup>ΔsseD</sup> orally. Feces were collected at the indicated time-points, enriched overnight in LB plus kanamycin, stained for O:5 and O:12 and analysed by flow cytometry. The fraction of the population that lost O:5 and O:12 antisera staining is shown over time. Outgrowth of O:12-negative *S.Tm* clones in IgA-deficient mice is likely due to weak compensatory responses from remaining adaptive immune mechanisms, e.g. IgM.

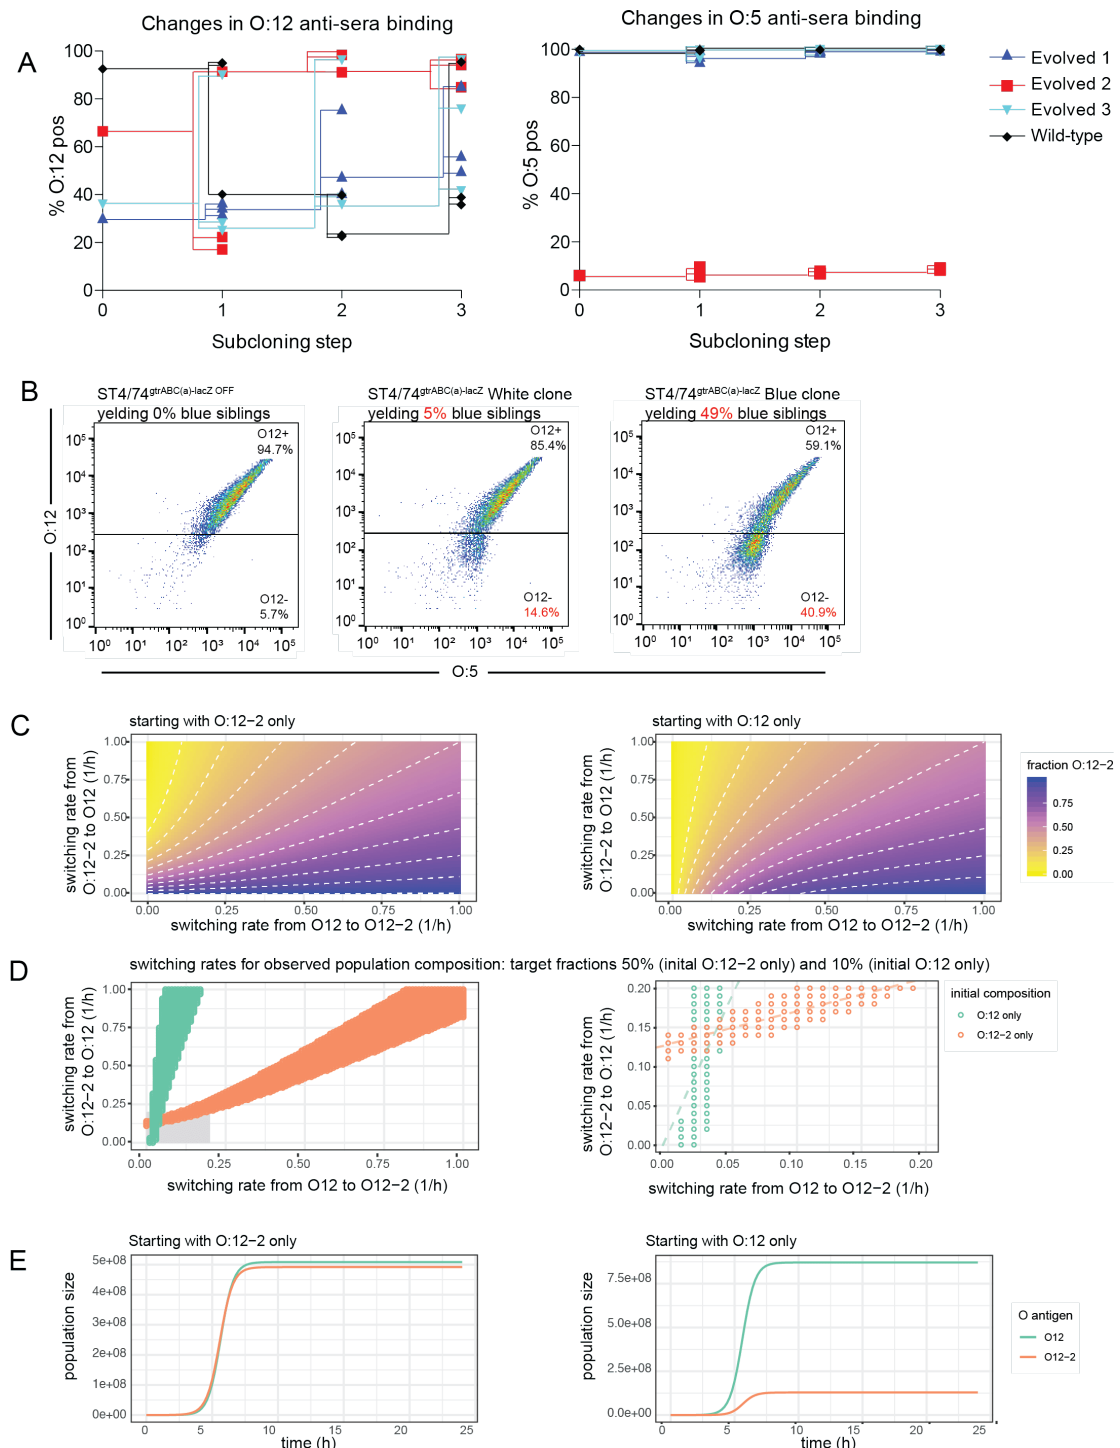

**Fig. S4: Loss of O:12-staining is a reversible phenotype.** **A.** Wild type and evolved *S.Tm* clones were picked from LB plates, cultured overnight, phenotypically characterized by O:12 (left panel) and O:5 staining (right panel), plated and re-picked. This process was repeated over 3 cycles with lines showing the descendants of each clone. **B.** Comparison of fractions of O:12-positive and O:12-negative bacteria (in fact O:12-2) determined by flow cytometry staining with typing sera and by blue-white colony counts using a *gtrABC-lacZ* reporter strain. **C-E.** Results of a mathematical model simulating bacterial growth and antigen switching. **C.** Switching rates from O:12 to O:12-2 and from O:12-2 to O:12 were varied computationally, and the fraction of O:12-2 was plotted after 16h of growth. Left-hand plot depicts the results of the deterministic model when starting with 100% O:12-2, right-hand plot depicts the results when starting with 100% O:12. **D.** depicts only the switching rates that comply with the experimentally observed antigen ratios after overnight growth (90% O:12



when starting with O:12, and 50% O:12 when starting with O:12-2). Right-hand plot is a zoomed version showing values for switching rates between  $0 - 0.1 \text{ h}^{-1}$  (marked by a grey rectangle in **D**, left-hand plot). Dashed lines are linear regressions on the values in this range, and their intersection marks the switching rates used for the stochastic simulation in (E). **E**. Simulation results of bacterial population growth, when starting with only O:12-2 (left-hand plot) or only O:12 (right-hand plot).  $\mu = 2.05 \text{ h}^{-1}$  was kept constant in all simulations; switching rates were varied in steps of  $0.01 \text{ h}^{-1}$  in (C and D), and kept constant at  $s_{\rightarrow 12} = 0.144 \text{ h}^{-1}$  and  $s_{\rightarrow 12-2} = 0.0365 \text{ h}^{-1}$  in (E); the starting populations were always  $10^4 \text{ cells}$  individuals of the indicated phenotype; carrying capacity was always  $K = 10^9 \text{ cells}$ . Time resolution for the simulations is  $0.2 \text{ h}$ .

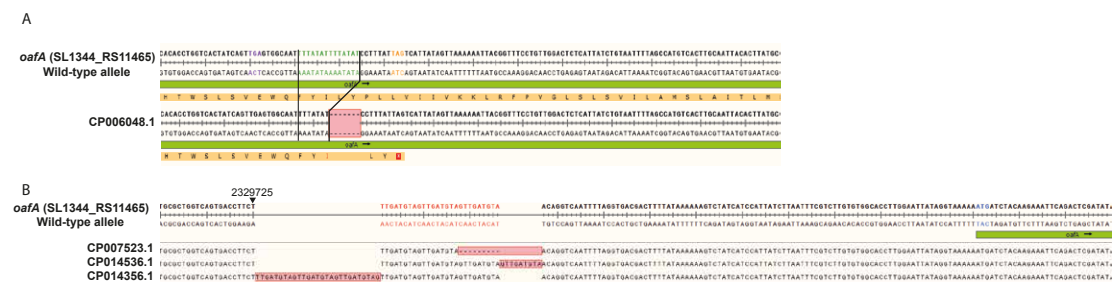

**Fig. S5: Mutations detected in the *oafA* gene sequence among several strains of *S. Tm* A.** Aligned fractions of the *oafA* ORF from a natural isolate (from chicken) presenting the same 7 bp deletion detected in mutants of *S. Tm* SL1344 emerging in vaccinated mice. *S. Tm* SL1344 was used as a reference(65). **B.** Aligned *oafA* promoter sequences from three natural isolates of human origin (stool or cerebrospinal fluid(66)) showing variations in the number of 9 bp direct repeats.

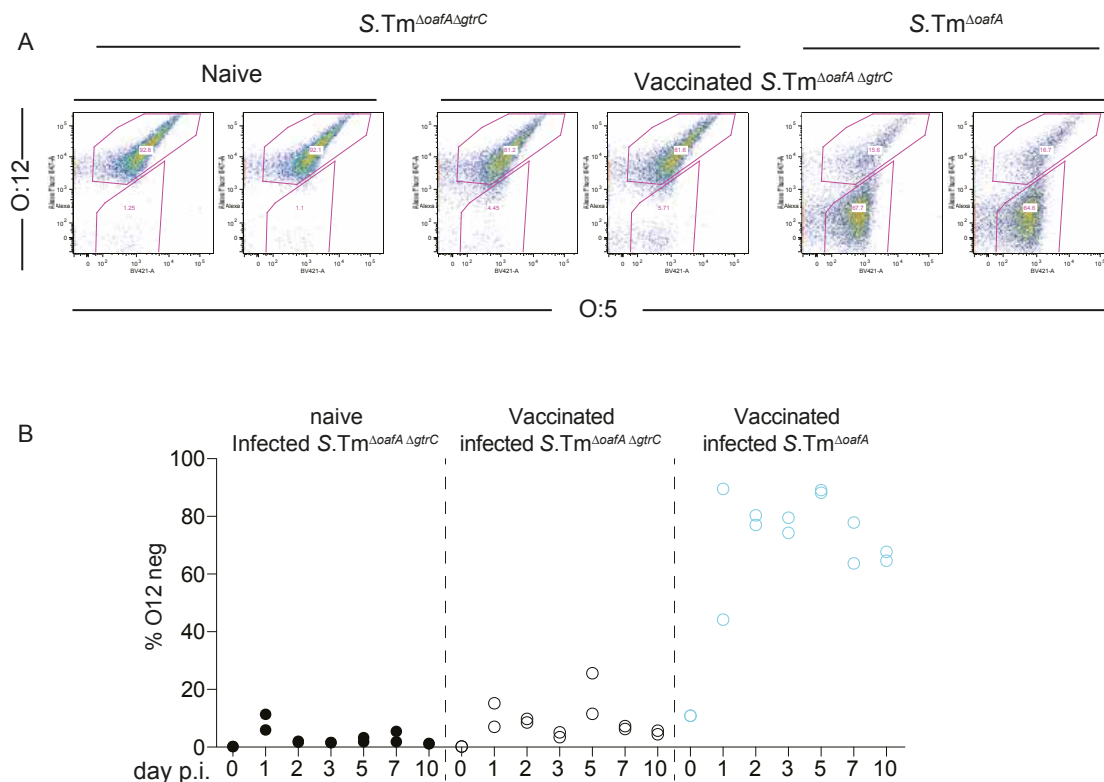

**Fig. S6: Glucosyltransferases containing loci including *gtrABC* are required for generation of the O:12<sup>Bimodal</sup> phenotype:** Wild type 129Sv mice were mock-vaccinated or were vaccinated with PA-*S.Tm* <sup>$\Delta$ oafA $\Delta$ gtrC</sup> as in Fig. 1A. On d28, all mice were pre-treated with streptomycin, and infected with the indicated strain. A. Feces recovered at day 10 post-infection, was enriched overnight by culture in streptomycin, and stained for O:12. Fraction O:12-low *S.Tm* was determined by flow cytometry. Percentage of *S.Tm* that are O:12-negative was quantified over 10 days and is plotted in panel B.

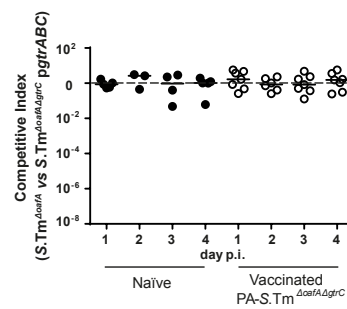

**Fig. S7: The  $\Delta gtrC$  mutation can be complemented in trans:** Mice were vaccinated and pre-treated as in **Fig. 3**. The inoculum contained a 1:1 ratio of *S.Tm*<sup>ΔoafA</sup> and *S.Tm*<sup>ΔoafA ΔgtrC</sup> *pgtrABC*. Competitive index in feces was determined by differential selective plating over 4 days post-infection.

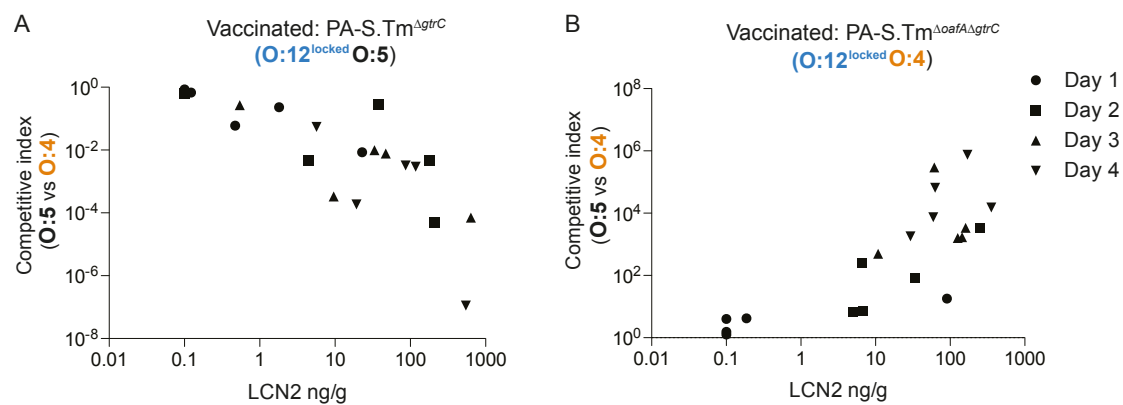

**Fig. S8: Fecal lipocalin-2 measurements corresponding to Fig. 3A.** Fecal Lipocalin 2 (LCN2) over days 1-4 plotted against the competitive index of infection for animals from Fig. 3A, vaccinated either against O:5-producing *S. Tm* (A), or O:4-producing *S. Tm* (B). Symbols indicate different days post-infection as indicated in the legend.







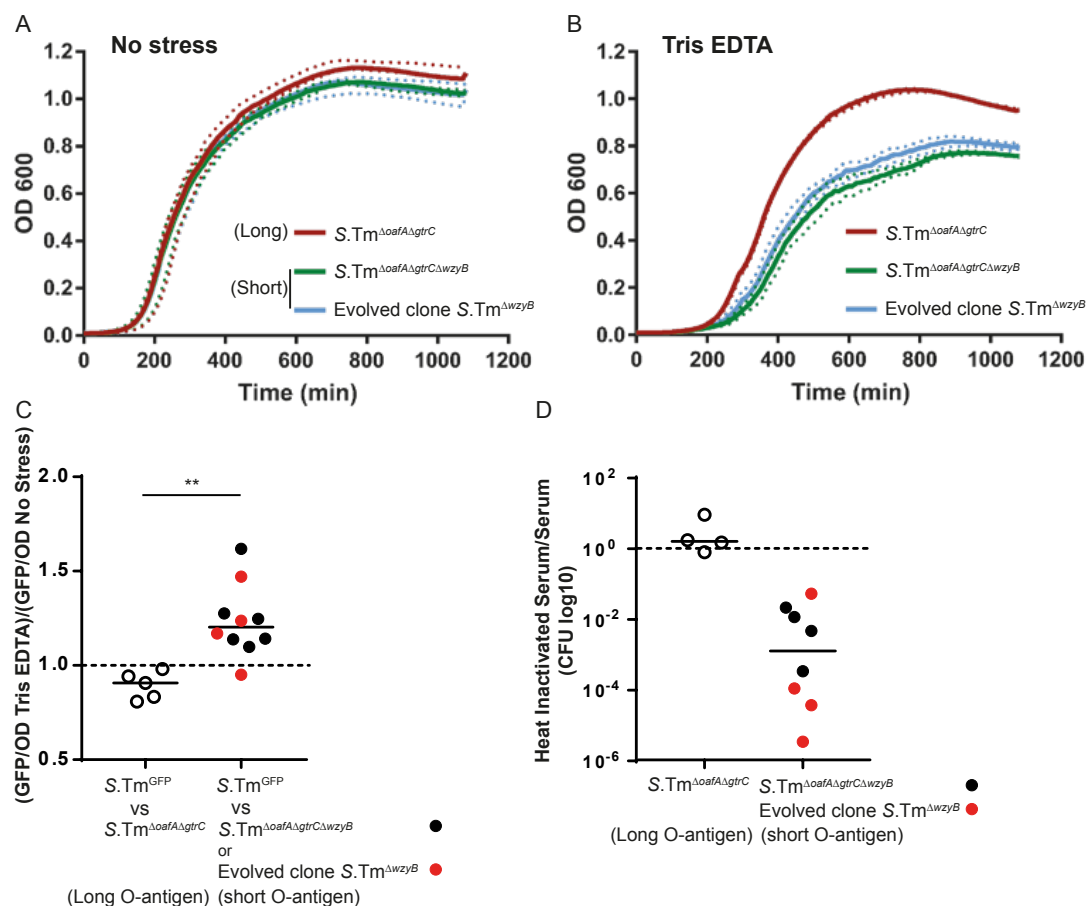

**Fig. S11 Synthetic and natural deletions of *wzyB* reduce the fitness of *S. Tm* in presence of Tris-EDTA and serum complement.** The deletion of *wzyB* does not affect the growth of *S. Tm* or *S. Tm*<sup>ΔoafA ΔgtrC</sup> in LB (No stress) (A) but impairs growth in presence of Tris-EDTA (B). Dashed lines represent the range of variations between experiments. This was in line with the outcome of competitions between *S. Tm* expressing constitutive Green Fluorescent Protein (*S. Tm*<sup>GFP</sup>) and *S. Tm*<sup>ΔoafA ΔgtrC ΔwzyB</sup> or a *wzyB* mutant isolated from an Evoltrap vaccinated mouse (C). The level of GFP corrected for the optical density (OD) served as readout to quantify the *S. Tm*<sup>GFP</sup> population at the end of the overnight growth, in presence of *S. Tm*<sup>ΔoafA ΔgtrC</sup>, *S. Tm*<sup>ΔoafA ΔgtrC ΔwzyB</sup> or an evolved *S. Tm*<sup>ΔwzyB</sup>, in LB with or without Tris-EDTA. Values above 1 (dashed line) indicates that relatively more GFP was detected in presence of Tris-EDTA than without, which resulted from a competitive advantage of *S. Tm*<sup>GFP</sup> in presence of stress. D. The deletion of *wzyB* makes *Salmonella* sensitive to human serum complement. Values below 10<sup>0</sup> (dashed line) indicates that the number of colony-forming units (CFU) detected after incubation in human serum was lower than after incubation in heat inactivated human serum.

### **Supplementary Movies A and B**

Visualization of O:12 phase variation using live-cell immunofluorescence. Cells expressing GFP (green) pre-stained with fluorescently-labeled recombinant murine IgA STA121 specific for the O:12 epitope (red) were loaded into a microfluidic chip for time-lapse microscopy. Cells were fed continuously S.Tm-conditioned LB containing fluorescently-labeled recombinant murine IgA STA121 specific for the O:12 epitope. (A) Loss and (B) gain of antibody reactivity (red staining) was observed, indicative of O:12 phase variation.

**Supplementary Table 1: Strains and plasmids used in this study**

| Strains                                                                                                                                          | Background                          | Relevant genotype                                      | Resistance*        | Reference                    |
|--------------------------------------------------------------------------------------------------------------------------------------------------|-------------------------------------|--------------------------------------------------------|--------------------|------------------------------|
| <i>S.Tm</i> <sup>WT</sup>                                                                                                                        | SL1344                              | Wild-Type strain SB300                                 | Sm                 | <i>Hoiseth 1981</i> (68)     |
| <i>S.Tm</i> <sup><i>AsseD</i></sup>                                                                                                              | SB300                               | <i>sseD::aphT</i>                                      | Sm, Kan            | <i>Hapfelmeier 2005</i> (69) |
| <i>S.Tm</i> <sup><i>ΔoafA</i></sup>                                                                                                              | SB300                               | <i>ΔoafA Tag1::aphT</i>                                | Sm, Kan            | This work                    |
| <i>S.Tm</i> <sup><i>ΔgtrC</i></sup>                                                                                                              | SB300                               | <i>gtrC(a)::cat</i>                                    | Sm, Cm             | This work                    |
| <i>S.Tm</i> <sup><i>ΔgtrA</i></sup>                                                                                                              | SB300                               | <i>gtrA(a)::cat</i>                                    | Sm, Cm             | This work                    |
| <i>S.Tm</i> <sup><i>ΔoafA ΔgtrC</i></sup>                                                                                                        | SB300                               | <i>ΔoafA gtrC(a)::cat</i>                              | Sm, Cm             | This work                    |
| <i>S.Tm</i> <sup><i>ΔoafA ΔgtrC kan</i></sup>                                                                                                    | SB300                               | <i>ΔoafA gtrC(a)Tag1::aphT</i>                         | Sm, Kan            | This work                    |
| <i>S.Tm</i> <sup><i>ΔoafA ΔgtrC ΔwzyB</i></sup>                                                                                                  | SB300                               | <i>ΔoafA gtrC(a) wzyB::cat</i>                         | Sm, Cm             | This work                    |
| <i>S.Tm</i> <sup><i>ΔoafA ΔGT</i></sup>                                                                                                          | SB300                               | <i>ΔoafA ΔgtrB(a) ΔgtrB(b) ΔSTM0712-0723 Δwca-wza</i>  | Sm                 | This work                    |
| <i>S.Tm</i> <sup><i>gtrABC-lacZ</i></sup>                                                                                                        | ST4/74                              | <i>gtrABC(a)-lacZ</i>                                  |                    | <i>Broadbent 2010</i> (22)   |
| <i>S.Tm</i> <sup><i>gtrABC-lacZ OFF</i></sup>                                                                                                    | ST4/74                              | <i>gtrABC(a)-lacZ</i> ; 3rd GTAC->GATA; 4th GATC->GATT |                    | <i>Broadbent 2010</i> (22)   |
| <i>S.Tm</i> <sup><i>ΔoafA ΔgtrC pGtrABC</i></sup>                                                                                                | SB300                               | <i>ΔoafA gtrC(a)::cat pGtrABC</i>                      | Sm, Cm, Amp        | This work                    |
| <i>S.Tm</i> <sup>GFP</sup>                                                                                                                       | SB300                               | Wild-Type strain SB300 pM965                           | Sm, Amp            | This work                    |
|                                                                                                                                                  |                                     |                                                        |                    |                              |
| <b>Evolved clones</b>                                                                                                                            |                                     |                                                        |                    |                              |
| Evolved clone O:4,12                                                                                                                             | <i>S.Tm</i> <sup><i>AsseD</i></sup> | <i>sseD::aphT</i> ; clone R423A                        | Sm, Kan            | This work                    |
| Evolved clone 1 O:5,12 <sup>Bimodal</sup>                                                                                                        | <i>S.Tm</i> <sup><i>AsseD</i></sup> | <i>sseD::aphT</i> ; clone R421B                        | Sm, Kan            | This work                    |
| Evolved clone 2 O:4,12 <sup>Bimodal</sup>                                                                                                        | <i>S.Tm</i> <sup><i>AsseD</i></sup> | <i>sseD::aphT</i> ; clone R423B                        | Sm, Kan            | This work                    |
| Evolved clone 3 O:5,12 <sup>Bimodal</sup>                                                                                                        | <i>S.Tm</i> <sup><i>AsseD</i></sup> | <i>sseD::aphT</i> ; clone R430B                        | Sm, Kan            | This work                    |
| Evoltrap evolved clones                                                                                                                          | <i>S.Tm</i> <sup>WT</sup>           |                                                        | Sm                 | This work                    |
|                                                                                                                                                  |                                     |                                                        |                    |                              |
| <b>Plasmids</b>                                                                                                                                  | <b>Backbone</b>                     | <b>Relevant genotype</b>                               | <b>Resistance*</b> | <b>Reference</b>             |
| pM965                                                                                                                                            | pSC101                              | <i>P<sub>rpsM</sub>-gfp</i>                            | Amp                | <i>Stecher 2004</i> (44)     |
| pgtrABC                                                                                                                                          | pM965                               | <i>P<sub>rpsM</sub>-gtrABC(a)</i>                      | Amp                | This work                    |
| pKD46                                                                                                                                            |                                     |                                                        | Amp                | <i>Datsenko 2000</i> (42)    |
| pCP20                                                                                                                                            |                                     |                                                        | Amp, Cm            | <i>Datsenko 2000</i> (42)    |
| pKD3                                                                                                                                             |                                     |                                                        | Cm                 | <i>Datsenko 2000</i> (42)    |
|                                                                                                                                                  |                                     |                                                        |                    |                              |
| * Relevant resistances only: Sm = ≥50 μg/ml streptomycin; Cm = ≥6 μg/ml chloramphenicol; Kan = ≥50 μg/ml kanamycin; Amp = ≥100 μg/ml ampicillin. |                                     |                                                        |                    |                              |



Supplementary Table 2: Primers used in this study

| Primer name       | Sequence                                                           | Purpose                                                    | Reference |
|-------------------|--------------------------------------------------------------------|------------------------------------------------------------|-----------|
| oafA_Seq_up       | CCGCCATAGTTACGTTTTG                                                | Sequencing oafA                                            | This work |
| oafA_Seq_dw       | AAGCTATACACATAAAATAATTGC                                           |                                                            | This work |
| oafA_IntSeq1_up   | AGTACTTGATTTTATATTGCAAG                                            |                                                            | This work |
| oafA_IntSeq2_up   | CAGCTTTATGGGATAGTCC                                                |                                                            | This work |
| oafA_IntSeq3_up   | GCCTGATATTTCCTTCCTC                                                |                                                            | This work |
| oafA_IntSeq4_up   | CCGTAATCTGAGAGATAATGA                                              |                                                            | This work |
| Del_oafA_up       | AATTATAGGTAAATAATGATCTACAAAGAAATCAGACTCGTGTGTAGGCTGGAGCTGCTTC      | In frame deletion oafA                                     | This work |
| Del_oafA_dw       | GGCAAGCCCCCTCGTTTATTTTGAATCTGCTTTTCACTCATATGAATATCCTCCTTAG         |                                                            | This work |
| Ver_oafA_up       | ATGTAGTTGATGTACAGAGTC                                              | Deletion verification oafA                                 | This work |
| Ver_oafA_dw       | ATGCCCATCAGAAAAGCT                                                 |                                                            | This work |
| Ver_STM0558_up    | ATTGGTGTGATAATCCTATTG                                              | Deletion verification gtrC(a)                              | This work |
| Ver_STM0558_dw    | GCTATCAGCCTGATATGCG                                                |                                                            | This work |
| Ver_STM4205_up    | GTAATCATCAGAGTGAATAGG                                              | Deletion verification gtrC(b)                              | This work |
| Ver_STM4205_dw    | CGCAATTAGCCTTATTTGCG                                               |                                                            | This work |
| Del_wca_wza_up    | TAAAAATAGCGGTACTTACCTCCCCGCTTCGGCAGCGAATGTGTAGGCTGGAGCTGCTTC       | Deletion cluster wca-wza                                   | This work |
| Del_wca_wza_dw    | AGTGATAAATAATCAATGATGAAATCCAAAATGAAATGACATATGAATATCCTCCTTAG        |                                                            | This work |
| Ver_wca_wza_up    | CCATAACATTAAGTATGAACAAC                                            | Verification deletion cluster wca-wza                      | This work |
| Ver_wca_wza_dw    | AAGCCGCTATTAAATTCGACA                                              |                                                            | This work |
| Del_0712-23_up    | TGATGGATTGTGTTTGTGAAAGAGAAATATCTTACGCAAGTGTGTAGGCTGGAGCTGCTTC      | Deletion cluster SaltsV1_0712 to SaltsV1_0723              | This work |
| Del_0712-23_dw    | GGAATTAAGTACGCTTAGTTATATTTTCCCAAAATTTTCATATGAATATCCTCCTTAG         |                                                            | This work |
| Ver_0712-23_up    | ATTAACTCATCTGATCAGTGAT                                             | Verification deletion cluster SaltsV1_0712 to SaltsV1_0723 | This work |
| Ver_0712-23_dw    | GGCAGCGGCCCAATAAT                                                  |                                                            | This work |
| Del_0559_up       | CGACTAACGAGATTTTCATTTCGCATCCCTAAAGACAATGTGTGTAGGCTGGAGCTGCTTC      | In frame deletion gtrA(a)                                  | This work |
| Del_0559_dw       | CCGCTGATTTTCATATGTTGAAGTTATTCGCTAAGTACACATATGAATATCCTCCTTAG        |                                                            | This work |
| Ver_0559_up       | TAGAAAATAGTATCTGTGGCT                                              | Verification deletion gtrA(a)                              | This work |
| Ver_0559_dw       | GTAGTGCTACACTCCAGAC                                                |                                                            | This work |
| Del_gtrC_up       | ATAATTAAGAATGAGAAGAAATGGTTAACAATAGATTATGTGTAGGCTGGAGCTGCTTC        | In frame deletion gtrC(a)                                  | This work |
| Del_gtrC_dw       | TACATGAATGTATTATTAATTATTCGTAATATTCATTATCATATGAATATCCTCCTTAG        |                                                            | This work |
| Ver_gtrC_up       | CGCCCCGTACCCATTGG                                                  | Verification deletion gtrC(a)                              | This work |
| Ver_gtrC_dw       | TTGATAGGAATAGGTATCTTGG                                             |                                                            | This work |
| Del_wzyB_up       | TTCTAAAGGCTCTATATGCTTATAATTTTCATACATTGCATATGCTGTGCAGGCTGGAGCTGCTTC | In frame deletion wzyB                                     | This work |
| Del_wzyB_dw       | TTCCCGCGGTATAACTTATTATTGTTCTTAGTAAACGAATCTCATATGAATATCCTCCTTAG     |                                                            | This work |
| Ver_wzyB_up       | CCAACAGCTTTACAGGAAC                                                | Verification deletion wzyB                                 | This work |
| Ver_wzyB_dw       | GATTGAGAATATCTGCCAGA                                               |                                                            | This work |
| PstII_Gtr57.59_up | ATCGTACTGCAGATGTTGAAGTTATTCGCTAAGTA                                | Cloning gtrABC(a)                                          | This work |
| EcoRV_Gtr57.59_dw | GTAATCGATATCGCGGGGAACATTATATATAC                                   |                                                            | This work |
| SeqInt1_gtrABC    | CATACATCCTCTATTACTCATC                                             | Sequencing PrpsM-gtrABC(a)                                 | This work |
| SeqInt2_gtrABC    | ATCTCTTTGAGTTGTATTAATTTCT                                          |                                                            | This work |
| SeqInt3_gtrABC    | TAATTAAAGATGAGAAGAAAATGGT                                          |                                                            | This work |
| SeqInt4_gtrABC    | GGTGTGGCTAAGCGC                                                    |                                                            | This work |
| SeqInt5_gtrABC    | CAGCTGTCTTACGCTTCAT                                                |                                                            | This work |
| SeqInt6_gtrABC    | ATCAGCCTGATATGGGATT                                                |                                                            | This work |

**Supplementary Table 3: Mutations detected in genome sequencing of O:12<sup>Bimodal</sup> clones**  
Numbers in parentheses indicate the number of reads covering the indicated position in the genome.

| Clone name | Ancestor                   |                             |          |  | Evolved (Chronic infection, day 36) |               |                        |               | Reference   | Allele | Region               | Function                                        |
|------------|----------------------------|-----------------------------|----------|--|-------------------------------------|---------------|------------------------|---------------|-------------|--------|----------------------|-------------------------------------------------|
|            | Staining with O:5 antisera | Staining with O:12 antibody | Serotype |  | R423A                               | R421B         | R423B                  | R430B         |             |        |                      |                                                 |
|            | Positive                   | Positive                    | O:12     |  | Negative                            | Positive      | Negative               | Positive      |             |        |                      |                                                 |
|            |                            |                             |          |  | Positive                            | Bimodal       | Bimodal                | Bimodal       |             |        |                      |                                                 |
|            |                            |                             |          |  | O:4.12                              | O:5.12 [12-2] | O:4.12 [12-2]          | O:5.12 [12-2] |             |        |                      |                                                 |
|            |                            |                             |          |  |                                     |               |                        |               | GGCGGCGGATT | -      | <i>dnaJ</i>          | Chaperone protein DnaJ                          |
|            | 635606 (98)                | 635606 (97)                 |          |  | 635606 (99)                         | 635606 (99)   | 635606 (100)           | 635606 (100)  | T           | A      | STM0576              | putative PTS system mannose-specific enzyme IAB |
|            | 1756092 (100)              | 1756092 (98)                |          |  | 1756092 (100)                       | 1756092 (100) | 1756092 (95)           | 1756092 (98)  | G           | A      | <i>ycfT</i>          | putative regulatory protein                     |
|            |                            | 2330274..2330280 (100)      |          |  |                                     |               | 2330274..2330280 (76)  |               | ATTTTAT     | -      | <i>oafA</i>          | O antigen acetylase                             |
|            |                            |                             |          |  |                                     |               | 2388693..2388694 (100) |               | TG          | C      |                      |                                                 |
|            |                            |                             |          |  |                                     |               | 2388696 (100)          |               | C           | A      |                      |                                                 |
|            |                            |                             |          |  |                                     |               | 2388699 (100)          |               | A           | T      | Deletion <i>g/pA</i> | sn-glycerol-3-phosphate dehydrogenase subunit A |
|            | 2411272 (100)              | 2411272 (99)                |          |  | 2411272 (99)                        | 2411272 (99)  | 2411272 (100)          | 2411272 (100) | T           | C      | <i>menC</i>          | o-succinylbenzoate synthase                     |
|            | 2433677 (100)              | 2433677 (99)                |          |  | 2433677 (100)                       | 2433677 (100) | 2433677 (100)          | 2433677 (100) | T           | G      | <i>ruoF</i>          | NADH-quinone oxidoreductase subunit F           |
|            |                            | 2728584..2728589 (64)       |          |  |                                     |               |                        |               | GCAAGG      | -      | intergenic           | Prophage Gifsy-1                                |
|            |                            |                             |          |  |                                     |               |                        |               | C           | T      | <i>hilC</i>          | Transcriptional regulator HilC                  |
|            |                            |                             |          |  |                                     |               |                        |               | A           | G      | <i>tsr</i>           | methyl-accepting chemotaxis protein I           |
|            |                            | 4810885 (98)                |          |  |                                     |               | 4810885 (98)           |               | G           | A      | <i>creD</i>          | conserved exported protein of unknown function  |
|            |                            |                             |          |  | 4905774 (22)                        |               |                        |               | T           | G      |                      |                                                 |
