1 **A rationally designed oral vaccine induces Immunoglobulin A in the**  
2 **murine gut that directs the evolution of attenuated *Salmonella* variants**

3 Médéric Diard<sup>2,\*</sup>, Erik Bakkeren<sup>1,d</sup>, Verena Lentsch<sup>3</sup>, Andrea Rocker<sup>2</sup>, Nahimi  
4 Amare Bekele<sup>2</sup>, Daniel Hoces<sup>3</sup>, Selma Aslani<sup>3</sup>, Markus Arnoldini<sup>3</sup>, Flurina  
5 Böhi<sup>1,a</sup>, Kathrin Schumann-Moor<sup>1,c</sup>, Jozef Adamcik<sup>3</sup>, Luca Piccoli<sup>4</sup>, Antonio  
6 Lanzavecchia<sup>4</sup>, Beth M. Stadtmueller<sup>5</sup>, Nicholas Donohue<sup>6,b</sup>, Marjan W. van der  
7 Woude<sup>6</sup>, Alyson Hockenberry<sup>7,8</sup>, Patrick H. Viollier<sup>9</sup>, Laurent Falquet<sup>10,11</sup>,  
8 Daniel Wüthrich<sup>12</sup>, Ferdinando Bonfiglio<sup>13</sup>, Claude Loverdo<sup>15</sup>, Adrian Egli<sup>12,13</sup>,  
9 Giorgia Zandomenighi<sup>14</sup>, Raffaele Mezzenga<sup>3,15</sup>, Otto Holst<sup>16</sup>, Beat H. Meier<sup>14</sup>,  
10 Wolf-Dietrich Hardt<sup>1,\*</sup>, Emma Slack<sup>1,3,\*</sup>

11

12 Affiliations;

13 1. Institute for Microbiology, Department of Biology, ETH Zürich, Zürich,  
14 Switzerland

15 2. Biozentrum, University of Basel, Basel, Switzerland

16 3. Institute for Food, Nutrition and Health, ETH Zürich, Zürich, Switzerland

17 4. Institute for Research in Biomedicine, Università della Svizzera italiana,  
18 Bellinzona, Switzerland

19 5. Department of Biochemistry, University of Illinois at Urbana-Champaign,  
20 Urbana, Illinois USA

21 6. York Biomedical Research Institute, Hull York Medical School, University of  
22 York, York, UK

23 7. Department of Environmental Microbiology, Eawag, Dübendorf, Switzerland

24 8. Department of Environmental Sciences, ETH Zürich, Switzerland

25 9. Microbiology and Molecular Medicine, University of Geneva, Geneva,

26 Switzerland

27 10. Department of Biology, University of Fribourg, Fribourg, Switzerland

28 11. Swiss Institute of Bioinformatics, Fribourg, Switzerland

29 12. Infection Biology, Basel University Hospital, Basel, Switzerland

30 13. Department of Biomedicine, University of Basel, Basel, Switzerland

31 14. Institute for Physical Chemistry, ETH Zürich, Zürich, Switzerland

32 15. ETH Zürich, Department of Materials, Wolfgang-Pauli-Strasse 10, 8093

33 Zürich.

34 16. Forschungszentrum Borstel, Borstel, Germany

35 Current addresses:

36 a. Department of Molecular Mechanisms of Disease, University of Zürich,

37 Zürich, Switzerland

38 b. Department of Orthopedics and Trauma, Medical University of Graz, Graz,

39 Austria.

40 c. University Hospital of Zürich, Division of Surgical Research, Zürich,

41 Switzerland

42 d. Department of Zoology, University of Oxford, Oxford, UK and Department

43 of Biochemistry, University of Oxford, Oxford, UK

44

45 \*Corresponding authors, contributed equally.

46 Prof. Médéric Diard: [mederic.diard@unibas.ch](mailto:mederic.diard@unibas.ch)

47 Prof. Wolf-Dietrich Hardt : [wolf-dietrich.hardt@micro.biol.ethz.ch](mailto:wolf-dietrich.hardt@micro.biol.ethz.ch)

48 Prof. Emma Slack: [emma.slack@hest.ethz.ch](mailto:emma.slack@hest.ethz.ch)

49

55 **Introductory paragraph**

56 The ability of gut bacterial pathogens to escape immunity by antigenic variation,  
57 particularly via changes to surface-exposed antigens, is a major barrier to  
58 immune clearance<sup>1</sup>. However, not all variants are equally fit in all  
59 environments<sup>2,3</sup>. It should therefore be possible to exploit such immune escape  
60 mechanisms to direct an evolutionary trade-off. Here we demonstrated this  
61 phenomenon using *Salmonella enterica* subspecies *enterica* serovar  
62 Typhimurium (S.Tm). A dominant surface antigen of S.Tm is its O-antigen: A  
63 long, repetitive glycan that can be rapidly varied by mutations in biosynthetic  
64 pathways or by phase-variation<sup>4,5</sup>. We quantified the selective advantage of O-  
65 antigen variants in the presence and absence of O-antigen specific IgA and  
66 identified a set of evolutionary trajectories allowing immune escape without an  
67 associated fitness cost in naïve mice. Through the use of oral vaccines, we  
68 rationally induced IgA responses blocking all of these trajectories, which  
69 selected for *Salmonella* mutants carrying deletions of the O-antigen  
70 polymerase *wzyB*. Due to their short O-antigen, these evolved mutants were  
71 more susceptible to environmental stressors (detergents, complement),  
72 predation (bacteriophages), and were impaired in gut colonization and  
73 virulence in mice. Therefore, a rationally induced cocktail of intestinal antibodies  
74 can direct an evolutionary trade-off in S.Tm. This lays the foundations for the  
75 exploration of mucosal vaccines capable of setting evolutionary traps as a  
76 prophylactic strategy.

77

78 **Main text**

79 The gut is a challenging environment for bacteria with high densities of phage,  
80 bile acids, antimicrobial peptides and secretory antibodies. These interact first  
81 with the outermost layer of the bacterial surface. Long, repetitive glycans, such  
82 as capsular polysaccharide, teichoic acids or O-antigens are ubiquitous as the  
83 outermost defense in bacteria. A particularly relevant feature of these glycan  
84 structures is that small changes in the structure of the repeating units, such as  
85 gain or loss of acetyl groups, when polymerized, result in major changes in  
86 conformation and charge-distribution of the glycans.

87 In the case of non-Typhoidal *Salmonella* this outermost glycan layer is  
88 predominantly made up of O-antigen: lipopolysaccharide core-linked, long,  
89 repetitive heteroglycans that hide most common outer-membrane proteins <sup>(6,7,</sup>  
90 **Fig.ED1**). The *S.Tm* wild type (*S.Tm*<sup>WT</sup>) O:4[5], 12-0 O-antigen is a polymer of  
91 a triose repeating backbone (-mannose- $\alpha$ -(1 $\rightarrow$ 4)-rhamnose- $\alpha$ -(1 $\rightarrow$ 3)-  
92 galactose- $\alpha$ -(1 $\rightarrow$ 2), constituting the O:12-0 epitope) with an  $\alpha$ -(1 $\rightarrow$ 3)-abequose  
93 side-branch at the mannose (constituting the O:4 epitope, or when O-acetylated  
94 the O:5 epitope) (**Fig. 1A**). The *S.Tm*<sup>WT</sup> reacts to O:5-typing antisera and O:12-  
95 0-typing antibodies (**Fig. 1B, and C, S1-3**). In the SL1344 strain of *S.Tm*, two  
96 major shifts in O-antigen composition have been reported. Firstly, complete loss  
97 of abequose acetylation, generating an O:4-only phenotype, occurs via loss of  
98 function mutations in the abequose acetyl transferase gene *oafA*<sup>8</sup>, (**Fig. 1A and**  
99 **B**). Secondly, the O:12-0 epitope can be converted to an O:12-2 epitope by ( $\alpha$ -  
100 (1 $\rightarrow$ 4) glucosylation of the backbone galactose (**Fig. 1A and C**). This occurs  
101 via expression of a glucosyl transferase *gtrABC* operon (STM0557-0559),  
102 controlled by DAM-dependent methylation i.e. by phase variation<sup>4,9</sup>. Note that  
103 *S.Tm* strain SL1344 lacks a second common operon required for linking

104 glucose via an  $\alpha$ -(1→6) linkage to the backbone galactose, generating the O:1  
105 serotype. All of these structural O-antigen variants exert only a mild fitness  
106 defect in the naïve gut (<sup>5,9,10</sup>, **Fig 1D and E**). However, there is also evidence  
107 for selection of mutants at loci coding for the O-antigen polymerases and so-  
108 called “non-typable” *Salmonella* strains with a single-repeat O-antigen are  
109 occasionally observed amongst isolates from infected humans or animals<sup>11</sup>.  
110 Such strains lose outer membrane robustness, due to loss of the rigid  
111 hydrophilic glycan layer<sup>12</sup>, . and therefore have decreased fitness both in the  
112 gut and in the environment<sup>2,3,13</sup>.  
113 We hypothesized that the host's immune response could generate conditions  
114 in which the fitness of O-antigen polymerase mutants is promoted, driving the  
115 emergence of an evolutionary trade-off. Intestinal antibodies (predominantly  
116 secretory IgA) are known to exert specific selective pressures on targeted  
117 species<sup>14–16</sup>. In order to investigate the evolutionary consequences of vaccine-  
118 induced secretory antibody responses in the gut, without the major ecological  
119 shifts associated with live-attenuated vaccine infection<sup>17–19</sup>, we made use of an  
120 established high dose, inactivated oral vaccination technique<sup>15,20,21</sup> that induces  
121 intestinal IgA responses without detectable intestinal damage, inflammation or  
122 colonization by the vaccine strains<sup>21</sup>. Our standard vaccine (“PA-S.Tm”)  
123 consists of concentrated peracetic acid killed bacteria<sup>21</sup>. Conventional mice  
124 harboring a complex microbiota (16S amplicon analysis available<sup>22</sup>) received  
125  $10^{10}$  particles of PA-S.Tm orally once per week for 4 weeks. Subsequently,  
126 these mice were antibiotic-treated to open a niche for the pathogen in the large  
127 intestine, and were infected with S.Tm SL1344, which rapidly colonizes the

128 cecum, generating typhlocolitis, and invasive disease in the mesenteric lymph  
129 nodes, spleen and liver<sup>23,24</sup>.

130 We first quantified the competitive fitness of *S.Tm* mutants genetically “locked”  
131 into individual structural O-antigen compositions in vaccinated and naïve mice.  
132 Competition between *S.Tm* <sup>$\Delta$ oafA  $\Delta$ gtrC</sup> (**O:4**, O:12-0-locked) and *S.Tm* <sup>$\Delta$ gtrC</sup>  
133 (**O:4[5]**, O:12-0-locked) demonstrated no difference in fitness in naïve mice  
134 over 4 days of infection. However, in mice vaccinated either against the O:4 or  
135 the O:4[5] variant (**Fig. S4**), we observed up to a 10<sup>7</sup>-fold outcompetition of the  
136 IgA-targeted O-antigen variant within 4 days (**Fig. 1D**). The magnitude of the  
137 selective advantage correlated with the magnitude of the intestinal IgA  
138 response to each O-antigen variant (**Fig. 1F and G**). Therefore, IgA can exert  
139 a strong selective pressure on the O:4/O:4[5] O-antigen variants. Competing  
140 *S.Tm* <sup>$\Delta$ oafA</sup> (**O:12-phase-variable**, O:4) against *S.Tm* <sup>$\Delta$ oafA  $\Delta$ gtrC</sup> (**O:12-locked**,  
141 O:4) revealed a mild benefit of O:12 phase variation in naïve mice up to day 4  
142 post-infection, in line with published data (**Fig. 1E**)<sup>4,5</sup>. However, we observe a  
143 major fitness benefit of phase variation in vaccinated mice in which the IgA  
144 response is highly biased to recognition of O:12-0 O-antigens (**Fig. 1E, H**. Red  
145 symbols, **Fig. S5**). Correspondingly, vaccinated mice with an outgrowth of  
146 phase-variable *S.Tm* also displayed initiation of intestinal inflammation, as  
147 quantified by fecal Lipocalin 2 (LCN2, **Fig. 1I**). The mechanistic basis of this  
148 selective advantage could be confirmed by complementation of the *gtrC* gene  
149 in trans (**Fig. S6**). Therefore O:12-0-targeting IgA can exert a strong selective  
150 pressure against *S.Tm* unable to phase-vary the O:12-0 part of the O-antigen.  
151 As neither of these variants (O:4[5] to O:4 and O:12-0 to O:12-2) are associated  
152 with a major loss-of-fitness in naïve mice (**Fig. 1D and E**), this implied that such

153 variants should be selected for during infections of vaccinated mice with wild  
154 type *Salmonella*.

155 We therefore established whether natural emergence of these “IgA-escape”-  
156 S.Tm variants occurred sufficiently fast to be observed during wild type S.Tm  
157 infections. For this purpose, we treated mice with a wild type PA-S.Tm oral  
158 vaccine as above, or with a vehicle-only control, and then challenged these  
159 animals with wild type S.Tm. Around 30% of vaccinated mice showed intestinal  
160 inflammation at 18 h post infection (**Fig. 2A**), despite the presence of robust  
161 anti-S.Tm<sup>wt</sup> intestinal IgA in all vaccinated animals (**Fig. 2B**). When S.Tm  
162 clones were recovered from the cecal content of vaccinated mice with intestinal  
163 inflammation, these were typically recognized less well by vaccine-induced IgA  
164 than S.Tm clones from the cecum of vaccinated and protected mice (**Fig. 2C**).  
165 In 11 of 34 mice analysed, we observed clones with complete loss-of-binding  
166 to an O:5-specific polyclonal antisera within 4 days (Table S3, **Fig 2D**).  
167 Resequencing of O:5-negative clones confirmed a 7 bp contraction of a tandem  
168 repeat in the open reading frame of *oafA*, coding for the abequose acetylase  
169 (**Fig. 2E**, 10 different clones from three independent experiments), that is also  
170 found in multiple NCBI deposited genomes<sup>25</sup> (**Fig. ED2A**). A second site of  
171 microsatellite instability is present in the promoter of *oafA* suggesting a further  
172 possibility for rapid inactivation (**Fig. ED2B**), and this gene was found to be  
173 under negative selection in a recent screen of published *Salmonella*  
174 genomes<sup>26</sup>.

175 In contrast, loss of O:12-0 staining was bimodal within individual clones (**Fig.**  
176 **2F**), consistent with phase-variation<sup>4</sup> and no reproducible mutations were  
177 identified in these clones on genome resequencing (**Table S3**). Instead,

178 methylation analysis revealed a methylation pattern indicative of the *gtrABC*  
179 promoter being in an “ON” conformation (**Fig. 2G**). Serial passage of these  
180 clones (**Fig. ED3A**), as well as cultivation in microfluidic devices  
181 (**Supplementary videos 1 and 2**) confirmed the ability of clones to switch  
182 between O:12-0-positive and negative states. The STM0557-0559 *gtrABC*  
183 locus was confirmed to be essential for this observed loss of O:12-0 epitope as  
184 strains lacking *gtrC* remained 100% O:12-0-positive even under strong *in vivo*  
185 selection (**Fig. ED3B and C**). This phenotype could be replicated by adoptive  
186 transfer of a recombinant monoclonal IgA specific for the O:12-0 epitope  
187 (mSTA121, **Fig. ED4**), confirming that O:12-0-binding IgA is sufficient to drive  
188 outgrowth of O:12-2-producing variants. Computational modeling of phase-  
189 variation and growth, as well as comparison of O:12-0/O12:2 switching rates of  
190 *lacZ* reporter strains suggested that selection for clones expressing *gtrABC* is  
191 sufficient to explain the recovery rate, without any intrinsic shift in phase  
192 variation switching rates (**Fig. ED5**). The chemical structure of O-antigen of the  
193 recovered clones was further confirmed by <sup>1</sup>H-NMR of purified O-antigen and  
194 by high resolution magic-angle spinning NMR of O-antigen on the surface of  
195 intact cells (**Fig. ED6**). Therefore, vaccine-induced IgA can select for the natural  
196 emergence of O-antigen variants within a few days of infection with S.Tm wild  
197 type, resulting in disease in vaccinated mice. This phenomenon can also be  
198 observed at later time-points in IgA-competent but not IgA-deficient mice during  
199 chronic infection with live-attenuated S.Tm strains (**Fig. ED7A and B**) i.e. IgA  
200 is necessary for selection of O-antigen variants during chronic infection.  
201 Correspondingly, although the inactivated oral vaccines induce a higher titre of  
202 *Salmonella*-binding IgA than the live vaccines (**Fig. ED7C**), the response to



203 chronic infection binds to O:4 and O4[5]-producing *S.Tm* with similar titres,  
204 while the response to inactivated vaccine is highly biased for the O-antigen  
205 variant of the vaccine (**Fig. ED7C**). This indicates that within-host O-antigen  
206 variation also occurs under the selective pressure of intestinal antibodies during  
207 chronic infections, and sequential priming will include a broad IgA response  
208 capable of recognizing multiple O-antigen variants.

209

210 We next investigated whether the relative fitness defect of a short O-antigen  
211 mutant can be compensated for by the selective advantage from lower IgA-  
212 binding in the gut lumen, i.e. whether IgA could drive an evolutionary trade-off.  
213 One-on-one competitions were carried out between *S.Tm* <sup>$\Delta$ oafA  $\Delta$ gtrC</sup> (O:4,12-0-  
214 locked, **long O-antigen**) and *S.Tm* <sup>$\Delta$ oafA  $\Delta$ gtrC  $\Delta$ wzyB</sup> (O:4,12-0-locked, **short O-**  
215 **antigen**, retains just a single O-antigen repeat) in the intestine of mice with and  
216 without IgA raised against *S.Tm* <sup>$\Delta$ oafA  $\Delta$ gtrC</sup> (**Fig. 3A**). The single repeat O-antigen  
217 strain was rapidly outcompeted in naive animals, in line with earlier studies<sup>11,27</sup>  
218 (**Fig. 3A**) indicating a major loss-of-fitness. However, in the gut of vaccinated  
219 mice, strains with short O-antigen were dominant by day 4 (**Fig. 3A**).  
220 Vaccinated antibody-deficient mice were indistinguishable from naive mice in  
221 these experiments, verifying that IgA is necessary for the selection of short O-  
222 antigen strains in the gut of vaccinated mice (**Fig. 3A**). Introduction of day 4  
223 fecal bacteria from vaccinated mice into naïve mice resulted in re-outgrowth of  
224 the strain with a long O-antigen, indicating that vaccine-induced IgA, and not  
225 secondary mutations in *S.Tm* <sup>$\Delta$ oafA  $\Delta$ gtrC  $\Delta$ wzyB</sup>, was responsible for competition  
226 outcome (**Fig. 3B**). The IgA titre recognizing short O-antigen-producing strains  
227 was lower than that against full-length O-antigen strains, consistent with the

228 selective advantage in vaccinated mice (**Fig. 3C**). As the long O-antigen can  
229 have several hundred repeats of the glycan, decreased antibody binding could  
230 be driven by lower O-antigen abundance or by loss of avidity-driven  
231 interactions. Loss of long O-antigen can therefore be an advantage to  
232 *Salmonella* in the gut lumen of vaccinated mice.

233 Based on these above observations, we hypothesized that emergence of  
234 mutants with a short O-antigen could be achieved for a wild type S.Tm infection  
235 if we could block all other IgA escape routes, effectively generating an  
236 evolutionary trap. To this end, mice received an oligovalent vaccine containing  
237 the **O:4[5],12** S.Tm <sup>$\Delta$ gtrC</sup>, **O:4,12** S.Tm <sup>$\Delta$ oafA  $\Delta$ gtrC</sup>, **O:4,12-2** S.Tm <sup>$\Delta$ oafA</sup> pgtrABC,  
238 and **O:4[5],12-2** S.Tm pgtrABC strains (referred to as PA-S.Tm<sup>ET</sup>). This  
239 induced a broad antibody response with high avidity for all four of the known  
240 long O-antigen variants present in our S.Tm SL1344 strain (**Fig. 3D, Fig.S7-8**).  
241 PA-S.Tm<sup>ET</sup> provided subtly better protection from intestinal inflammation in  
242 long-term infection of 129S1/SvImJ mice than the monovalent **O:5,12-0** vaccine  
243 (**Fig. 3E**, significant protection from intestinal inflammation at d9 with  
244 PA-S.Tm<sup>ET</sup> but not PA-S.Tm <sup>$\Delta$ gtrC</sup>), as well as on mixed challenge of Balb/c mice  
245 (**Fig. S9**, significant protection from intestinal inflammation at d4 with  
246 PA-S.Tm<sup>ET</sup> but not PA-S.Tm <sup>$\Delta$ gtrC</sup>). Moreover, our hypothesis that this vaccine  
247 can set an evolutionary trap was supported: short O-antigen-producing clones  
248 were detected in 12 of 18 PA-S.Tm<sup>ET</sup> vaccinated mice analysed across multiple  
249 experiments by phenotypic characterization (anti-O5<sup>dim</sup> flow cytometry staining,  
250 **Fig. 3F**). The O-antigen phenotype was confirmed by gel electrophoresis of  
251 purified LPS (**Fig. 3G**). Sequencing of evolved short-O-antigen clones (**Table**  
252 **S4**, n=5) revealed a common large deletion encompassing the *wzyB* gene (also

253 termed *rfc*), encoding the O-antigen polymerase<sup>11</sup> (**Fig. 3H**, **Fig. ED8** also  
254 reported in some "non-typable" *S.Tm* isolates from broilers<sup>11</sup>). This deletion is  
255 mediated by site-specific recombination between flanking direct repeats, which  
256 renders the *wzyB* locus unstable<sup>11</sup>.

257 We have previously published that IgA responses against the surface of rough  
258 *Salmonella* are identically induced by vaccination with either rough or wild type  
259 *Salmonella* oral vaccines<sup>28</sup>. Correspondingly, including a short-O-antigen  
260 mutant into our PA-*S.Tm*<sup>ET</sup> mix does not further improve IgA titres (**Fig. S10**).  
261 Note that in these experiments, we also do not observe a significant  
262 improvement of protection with PA-*S.Tm*<sup>ET</sup>, as PA-*STm*<sup>WT</sup> protected well out to  
263 day 3 in n=6 of 8 mice, when the experiment was terminated for ethical reasons  
264 relating to the control group. As the generation of *Salmonella* O-antigen variants  
265 is inherently stochastic, but a prerequisite for selection by IgA and therefore  
266 within-host evolution, perfect protection can be observed in a variable fraction  
267 of animals that had received the monovalent vaccine up to this time-point.  
268 However, no intestinal inflammation, as quantified by fecal Lipocalin-2, was  
269 observed in any of the mice receiving PA-*S.Tm*<sup>ET</sup> (n=9) or PA-*S.Tm*<sup>ET+wzyB</sup>  
270 (n=4).

271 We finally confirmed that re-isolated *wzyB*-deletion mutants phenocopied the  
272 fitness defects of targeted *wzyB* mutations in harsh environments. Single  
273 infections with *S.Tm* <sup>$\Delta$ oafA  $\Delta$ grC  $\Delta$ wzyB</sup> revealed that, in comparison to isogenic wild  
274 type counterparts, *wzyB*-deficient mutants (synthetic or evolved) are  
275 significantly less efficient at colonizing the gut of streptomycin pretreated naïve  
276 mice (**Fig. 4A**), disseminating systemically (**Fig. 4B**) and triggering  
277 inflammation (**Fig. 4C**), i.e. they have an intrinsic defect in colonization and

278 virulence. This attenuation can be attributed to compromised outer membrane  
279 integrity<sup>12</sup> and also manifests as an increased sensitivity to membrane  
280 destabilization by EDTA, bile acids and weak detergents (**Fig ED9A-E**) and  
281 increased sensitivity to complement-mediated lysis<sup>11,27</sup> (**Fig. ED9F**). It is also  
282 well-documented that specific interactions between the tail spike fiber and O-  
283 antigen reduce the host-range of ubiquitous lytic phages<sup>29,30</sup>. Correspondingly,  
284 infection of the short-O-antigen strains with filtered wastewater generated  
285 visible lysis plaques of various sizes (**Fig. 4D and E, Fig. ED10A**). About 10-  
286 fold less lysis plaques were visible in the same conditions with long O-antigen  
287 strains (**Fig. 4D and E, Fig. ED10A**). Sequencing of phages isolated from four  
288 plaques revealed four different T5-like phages (**Fig. 4F**). Infections with the  
289 purified phage  $\phi 12$  yielded more phages after infection of a short O-antigen  
290 evolved clone compared to the ancestor strains (**Fig. 4G**). We could confirm  
291 that infection was dependent on *btuB*, the vitamin B12 outer-membrane  
292 transporter that is normally shielded by a long O-antigen (**Fig, ED10B and**  
293 **C**). These results confirmed that the recovered *wzyB* mutants were indeed  
294 sensitive to diverse membrane stresses, innate immune defenses and common  
295 environmental phages that would be encountered during transmission or on  
296 infection of a new host. Therefore, vaccination can successfully drive evolution  
297 toward fitness trade-off *in vivo*.

298 These observations revealed the overlap between host IgA driven- and phage-  
299 driven *Salmonella* evolution. Both the *oafA* gene and the *gtrABC* operon are  
300 found at bacteriophage remnant loci, indicating that *S.Tm* has co-opted  
301 functions modulating sensitivity to bacteriophage attack in order to escape  
302 adaptive immunity. Of note, this example of “coincidental evolution”<sup>31,32</sup> could

303 be also driven by and influence how *Salmonella* escape protozoa predator  
304 grazing in the gut<sup>33</sup>. As protozoa are specifically excluded from our SPF mouse  
305 colonies, this effect could not be investigated here.

306 Our data, along with previous work on O:4[5] and O:12 variation<sup>4,5,9,10</sup>, clearly  
307 indicated direct selective pressure of the host immune system for within-host  
308 evolution/phase variation of the O-antigen. Nevertheless, IgA specificity is only  
309 one of many strong selective pressures that can be present in the intestine of  
310 a free-living animal. Previous work<sup>20,32-34</sup> indicates that inflammation, phage  
311 and predation by protozoa can all contribute, and may exhibit complex  
312 interactions. For example, inflammation induces the lytic cycle of a temperate  
313 phage: a phenomenon inhibited by IgA-mediated protection from disease<sup>20</sup>.  
314 Inflammation is also expected to be particularly detrimental to O-antigen-  
315 deficient strains that are poorly resistant to antimicrobial peptides and bile  
316 acids<sup>3</sup> (Fig. ED9). Aggregation of *Salmonella* by IgA may also generate  
317 particles that are too large for protozoal grazing, further interacting with  
318 bacterial predation in the gut, although this hypothesis has not been  
319 experimentally tested. We hope that our work has generated a framework and  
320 a set of tools that can be applied to better understand the influence of intestinal  
321 adaptive immunity on within-host evolution of bacteria more comprehensively,  
322 and that eventually this can be translated into better control of enteric  
323 pathogens. In our case, we observed that a tailored adaptive immune response  
324 can influence the evolution of bacteriophage/bacteria interactions to the  
325 detriment of the bacteria.

326 We have focused on one particular *S.Tm* strain here and it remains to be seen  
327 how far this concept can be extended. Further phage-encoded modification of

328 the O-antigen, such as the O:12-1 modification<sup>4</sup> will likely be required to make  
329 robust “evolutionary traps” for *Salmonella* Typhimurium “in the wild”.  
330 Additionally, species capable of producing capsular polysaccharides that mask  
331 the O-antigen, such as *Salmonella* Typhi and many *E.coli* strains, would require  
332 additional vaccine components (typically glycoconjugates) able to induce  
333 robust anti-capsule immunity. However, we expect the principle uncovered  
334 here, i.e. understanding the rapid within-host evolution of bacterial surface  
335 structures and using this information to rationally design oligomeric vaccines,  
336 to be broadly applicable. Correspondingly, our findings are consistent with  
337 earlier reports of IgA-mediated selection of surface glycans in diverse  
338 species<sup>14,35</sup>, and an earlier report that *gtrABC*-mediated O-antigen phase-  
339 variation of *Salmonella* Typhimurium ATCC 14028 confers a colonization  
340 benefit starting at day 10 post-infection (roughly the time when an IgA response  
341 would be first detected)<sup>5</sup>. Surface variation of teichoic acids for immune evasion  
342 can also be prophage-driven in *Staphylococcus aureus*<sup>36</sup>, although adaption of  
343 antibody-based techniques for gram-positive pathogens that are masters of  
344 immune evasion will likely be beyond the limits of this approach.

345 “Evolutionary trapping” of *Salmonella* by vaccine-induced IgA does not require  
346 any effect of IgA on the intrinsic mutation rate or phase-switching rates of  
347 *Salmonella*. Rather within-host evolution is the product of specific selective  
348 pressures (driven by IgA) on mutants and phase variants with changes in O-  
349 antigen structure, which are spontaneously generated at relatively high  
350 frequencies in the course of any intestinal infection. This genetic plasticity of  
351 large populations of microbes has always been the “Achilles heel” of antibiotic<sup>37</sup>,  
352 phage<sup>38</sup> or CRISPR-based<sup>39</sup> treatments, leading to resistance and treatment

353 failure. In the complex ecological setting of the intestine, where bacterial  
354 populations are large and relatively fast-growing, within-host evolution can be  
355 rapid, and surprisingly predictable. Via rationally designed oral vaccines, we  
356 demonstrate that this force can be harnessed to weaken pathogenicity and to  
357 alter bacterial susceptibility to predation. We therefore propose that  
358 understanding the most common within-host evolutionary trajectories of gut  
359 pathogens holds the key to developing robust prophylactics and therapies.

360

## 361 References

362

- 363 1. Fierer, J. & Guiney, D. G. Diverse virulence traits underlying different clinical outcomes  
364 of *Salmonella* infection. *J. Clin. Invest.* **107**, 775–780 (2001).
- 365 2. Kong, Q. *et al.* Effect of deletion of genes involved in lipopolysaccharide core and O-  
366 antigen synthesis on virulence and immunogenicity of *Salmonella enterica* serovar  
367 Typhimurium. *Infect. Immun.* **79**, 4227–4239 (2011).
- 368 3. Collins, L. V., Attridge, S. & Hackett, J. Mutations at *rfc* or *pmi* attenuate *Salmonella*  
369 typhimurium virulence for mice. *Infect. Immun.* **59**, 1079–1085 (1991).
- 370 4. Broadbent, S. E., Davies, M. R. & van der Woude, M. W. Phase variation controls  
371 expression of *Salmonella* lipopolysaccharide modification genes by a DNA  
372 methylation-dependent mechanism. *Mol. Microbiol.* **77**, 337–53 (2010).
- 373 5. Bogomolnaya, L. M., Santiviago, C. A., Yang, H.-J., Baumler, A. J. & Andrews-  
374 Polymenis, H. L. 'Form variation' of the O12 antigen is critical for persistence of  
375 *Salmonella* Typhimurium in the murine intestine. *Mol. Microbiol.* **70**, 1105–19 (2008).
- 376 6. van der Ley, P., de Graaff, P. & Tommassen, J. Shielding of *Escherichia coli* outer  
377 membrane proteins as receptors for bacteriophages and colicins by O-antigenic  
378 chains of lipopolysaccharide. *J. Bacteriol.* **168**, 449–451 (1986).
- 379 7. Bentley, A. T. & Klebba, P. E. Effect of lipopolysaccharide structure on reactivity of  
380 antiporin monoclonal antibodies with the bacterial cell surface. *J. Bacteriol.* **170**, 1063–  
381 8 (1988).
- 382 8. Slauch, J. M., Lee, A. A., Mahan, M. J. & Mekalanos, J. J. Molecular characterization  
383 of the *oafA* locus responsible for acetylation of *Salmonella* typhimurium O-antigen:  
384 *oafA* is a member of a family of integral membrane trans-acylases. *J. Bacteriol.* **178**,  
385 5904–9 (1996).
- 386 9. Davies, M. R., Broadbent, S. E., Harris, S. R., Thomson, N. R. & van der Woude, M.  
387 W. Horizontally acquired glycosyltransferase operons drive salmonellae  
388 lipopolysaccharide diversity. *PLoS Genet.* **9**, e1003568 (2013).
- 389 10. Kim, M. L. & Slauch, J. M. Effect of acetylation (O-factor 5) on the polyclonal antibody  
390 response to *Salmonella* typhimurium O-antigen. *FEMS Immunol. Med. Microbiol.* **26**,  
391 83–92 (1999).
- 392 11. Szabo, I., Grafe, M., Kemper, N., Junker, E. & Malorny, B. Genetic basis for loss of  
393 immuno-reactive O-chain in *Salmonella enterica* serovar Enteritidis veterinary isolates.  
394 *Vet. Microbiol.* **204**, 165–173 (2017).
- 395 12. Rojas, E. R. *et al.* The outer membrane is an essential load-bearing element in Gram-  
396 negative bacteria. *Nature* **559**, 617–621 (2018).
- 397 13. Ricci, V., Zhang, D., Teale, C. & Piddock, L. J. V. The o-antigen epitope governs  
398 susceptibility to colistin in *Salmonella enterica*. *MBio* **11**, 1–10 (2020).
- 399 14. Endt, K. *et al.* The microbiota mediates pathogen clearance from the gut lumen after  
400 non-typhoidal salmonella diarrhea. *PLoS Pathog.* **6**, e1001097 (2010).
- 401 15. Moor, K. *et al.* High-avidity IgA protects the intestine by enchainning growing bacteria.

- 402 *Nature* **544**, 498–502 (2017).
- 403 16. Porter, N. T., Canales, P., Peterson, D. A. & Martens, E. C. A Subset of  
404 Polysaccharide Capsules in the Human Symbiont *Bacteroides thetaiotaomicron*  
405 Promote Increased Competitive Fitness in the Mouse Gut. *Cell Host Microbe* **22**, 494-  
406 506.e8 (2017).
- 407 17. Dolowschiak, T. *et al.* IFN- $\gamma$  Hinders Recovery from Mucosal Inflammation during  
408 Antibiotic Therapy for Salmonella Gut Infection. *Cell Host Microbe* **20**, 238–49 (2016).
- 409 18. Felmy, B. *et al.* NADPH oxidase deficient mice develop colitis and bacteremia upon  
410 infection with normally avirulent, TTSS-1- and TTSS-2-deficient Salmonella  
411 Typhimurium. *PLoS One* **8**, e77204 (2013).
- 412 19. Grassl, G. A., Valdez, Y., Bergstrom, K. S. B., Vallance, B. A. & Finlay, B. B. Chronic  
413 Enteric *Salmonella* Infection in Mice Leads to Severe and Persistent  
414 Intestinal Fibrosis. *Gastroenterology* **134**, 768-780.e2 (2008).
- 415 20. Diard, M. *et al.* Inflammation boosts bacteriophage transfer between Salmonella spp.  
416 *Science* **355**, 1211–1215 (2017).
- 417 21. Moor, K. *et al.* Peracetic Acid Treatment Generates Potent Inactivated Oral Vaccines  
418 from a Broad Range of Culturable Bacterial Species. *Front. Immunol.* **7**, 34 (2016).
- 419 22. Wotzka, S. Y. *et al.* Escherichia coli limits Salmonella Typhimurium infections after diet  
420 shifts and fat-mediated microbiota perturbation in mice. *Nat. Microbiol.* **4**, 2164–2174  
421 (2019).
- 422 23. Barthel, M. *et al.* Pretreatment of mice with streptomycin provides a Salmonella  
423 enterica serovar Typhimurium colitis model that allows analysis of both pathogen and  
424 host. *Infect. Immun.* **71**, 2839–58 (2003).
- 425 24. Kaiser, P., Diard, M., Stecher, B. & Hardt, W.-D. The streptomycin mouse model for  
426 Salmonella diarrhea: functional analysis of the microbiota, the pathogen's virulence  
427 factors, and the host's mucosal immune response. *Immunol. Rev.* **245**, 56–83 (2012).
- 428 25. Hauser, E., Junker, E., Helmuth, R. & Malorny, B. Different mutations in the oafA gene  
429 lead to loss of O5-antigen expression in Salmonella enterica serovar Typhimurium. *J.*  
430 *Appl. Microbiol.* **110**, 248–53 (2011).
- 431 26. Cherry, J. L. Selection-Driven Gene Inactivation in Salmonella. *Genome Biol. Evol.* **12**,  
432 18–34 (2020).
- 433 27. Murray, G. L., Attridge, S. R. & Morona, R. Altering the length of the  
434 lipopolysaccharide O antigen has an impact on the interaction of Salmonella enterica  
435 serovar Typhimurium with macrophages and complement. *J. Bacteriol.* **188**, 2735–9  
436 (2006).
- 437 28. Moor, K. *et al.* Peracetic Acid Treatment Generates Potent Inactivated Oral Vaccines  
438 from a Broad Range of Culturable Bacterial Species. *Front. Immunol.* **7**, (2016).
- 439 29. Kim, M. & Ryu, S. Spontaneous and transient defence against bacteriophage by  
440 phase-variable glucosylation of O-antigen in Salmonella enterica serovar  
441 Typhimurium. *Mol. Microbiol.* **86**, 411–425 (2012).
- 442 30. Nobrega, F. L. *et al.* Targeting mechanisms of tailed bacteriophages. *Nat. Rev.*  
443 *Microbiol.* **16**, 760–773 (2018).
- 444 31. Levin, B. R. Selection and evolution of virulence in bacteria: An ecumenical excursion  
445 and modest suggestion. *Parasitology* **100**, S103–S115 (1990).
- 446 32. Diard, M. & Hardt, W.-D. Evolution of bacterial virulence. *FEMS Microbiol. Rev.* **41**,  
447 679–697 (2017).
- 448 33. Wildschutte, H., Wolfe, D. M., Tamewitz, A. & Lawrence, J. G. Protozoan predation,  
449 diversifying selection, and the evolution of antigenic diversity in Salmonella. *Proc. Natl.*  
450 *Acad. Sci. U. S. A.* **101**, 10644–10649 (2004).
- 451 34. Brussow, H., Canchaya, C. & Hardt, W.-D. Phages and the Evolution of Bacterial  
452 Pathogens: from Genomic Rearrangements to Lysogenic Conversion. *Microbiol. Mol.*  
453 *Biol. Rev.* **68**, 560–602 (2004).
- 454 35. Hsieh, S. *et al.* Polysaccharide Capsules Equip the Human Symbiont *Bacteroides*  
455 *thetaiotaomicron* to Modulate Immune Responses to a Dominant Antigen in the  
456 Intestine. *J. Immunol.* **jj1901206** (2020). doi:10.4049/jimmunol.1901206
- 457 36. Gerlach, D. *et al.* Methicillin-resistant Staphylococcus aureus alters cell wall  
458 glycosylation to evade immunity. *Nature* **563**, 705–709 (2018).
- 459 37. Hughes, D. & Andersson, D. I. Evolutionary Trajectories to Antibiotic Resistance.  
460 *Annu. Rev. Microbiol.* **71**, 579–596 (2017).
- 461 38. Pires, D. P., Costa, A. R., Pinto, G., Meneses, L. & Azeredo, J. Current challenges



- 462 and future opportunities of phage therapy. *FEMS Microbiology Reviews* **44**, 684–700  
463 (2020).
- 464 39. Bikard, D. *et al.* Exploiting CRISPR-cas nucleases to produce sequence-specific  
465 antimicrobials. *Nat. Biotechnol.* **32**, 1146–1150 (2014).
- 466 40. Harriman, G. R. *et al.* Targeted deletion of the IgA constant region in mice leads to IgA  
467 deficiency with alterations in expression of other Ig isotypes. *J. Immunol.* **162**, 2521–9  
468 (1999).
- 469 41. Gu, H., Zou, Y. R. & Rajewsky, K. Independent control of immunoglobulin switch  
470 recombination at individual switch regions evidenced through Cre-loxP-mediated gene  
471 targeting. *Cell* **73**, 1155–64 (1993).
- 472 42. Mombaerts, P. *et al.* RAG-1-deficient mice have no mature B and T lymphocytes. *Cell*  
473 **68**, 869–77 (1992).
- 474 43. Datsenko, K. A. & Wanner, B. L. One-step inactivation of chromosomal genes in  
475 *Escherichia coli* K-12 using PCR products. *Proc. Natl. Acad. Sci.* **97**, 6640–6645  
476 (2000).
- 477 44. Sternberg, N. L. & Maurer, R. Bacteriophage-mediated generalized transduction in  
478 *Escherichia coli* and *Salmonella typhimurium*. *Methods Enzymol.* **204**, 18–43 (1991).
- 479 45. Stecher, B. *et al.* Flagella and Chemotaxis Are Required for Efficient Induction of  
480 *Salmonella enterica* Serovar Typhimurium Colitis in Streptomycin-Pretreated Mice.  
481 *Infect. Immun.* **72**, 4138–4150 (2004).
- 482 46. Bolger, A. M., Lohse, M. & Usadel, B. Trimmomatic: a flexible trimmer for Illumina  
483 sequence data. *Bioinformatics* **30**, 2114–2120 (2014).
- 484 47. Li, H. & Durbin, R. Fast and accurate short read alignment with Burrows-Wheeler  
485 transform. *Bioinformatics* **25**, 1754–1760 (2009).
- 486 48. Walker, B. J. *et al.* Pilon: an integrated tool for comprehensive microbial variant  
487 detection and genome assembly improvement. *PLoS One* **9**, e112963 (2014).
- 488 49. Cingolani, P. *et al.* A program for annotating and predicting the effects of single  
489 nucleotide polymorphisms, SnpEff: SNPs in the genome of *Drosophila melanogaster*  
490 strain w1118; iso-2; iso-3. *Fly (Austin)*. **6**, 80–92 (2012).
- 491 50. Hoiseth, S. K. & Stocker, B. A. D. Aromatic-dependent *Salmonella typhimurium* are  
492 non-virulent and effective as live vaccines. *Nature* **291**, 238–239 (1981).
- 493 51. Moor, K. *et al.* Analysis of bacterial-surface-specific antibodies in body fluids using  
494 bacterial flow cytometry. *Nat. Protoc.* **11**, 1531–1553 (2016).
- 495 52. Arnoldini, M. *et al.* Bistable expression of virulence genes in salmonella leads to the  
496 formation of an antibiotic-tolerant subpopulation. *PLoS Biol.* **12**, e1001928 (2014).
- 497 53. van Vliet, S. *et al.* Spatially Correlated Gene Expression in Bacterial Groups: The Role  
498 of Lineage History, Spatial Gradients, and Cell-Cell Interactions. *Cell Syst.* **6**, 496-  
499 507.e6 (2018).
- 500 54. Ilg, K., Zandomenighi, G., Rugarabamu, G., Meier, B. H. & Aebi, M. HR-MAS NMR  
501 reveals a pH-dependent LPS alteration by de-O-acetylation at abequose in the O-  
502 antigen of *Salmonella enterica* serovar Typhimurium. *Carbohydr. Res.* **382**, 58–64  
503 (2013).
- 504 55. Westphal, O. & Jann, K. Bacterial Lipopolysaccharides Extraction with Phenol-Water  
505 and Further Applications of the Procedure. *Methods Carbohydr. Chem.* **5**, 83–91  
506 (1965).
- 507 56. Steffens, T. *et al.* The lipopolysaccharide of the crop pathogen *Xanthomonas*  
508 *translucens* pv. *translucens*: chemical characterization and determination of signaling  
509 events in plant cells. *Glycobiology* **27**, 264–274 (2017).
- 510 57. Ardisson, S. *et al.* Cell Cycle Constraints and Environmental Control of Local DNA  
511 Hypomethylation in  $\alpha$ -Proteobacteria. *PLoS Genet.* **12**, e1006499 (2016).
- 512 58. Li, H. A statistical framework for SNP calling, mutation discovery, association mapping  
513 and population genetical parameter estimation from sequencing data. *Bioinformatics*  
514 **27**, 2987–93 (2011).
- 515 59. Barnett, D. W., Garrison, E. K., Quinlan, A. R., Strömberg, M. P. & Marth, G. T.  
516 BamTools: a C++ API and toolkit for analyzing and managing BAM files.  
517 *Bioinformatics* **27**, 1691–2 (2011).
- 518 60. Quinlan, A. R. & Hall, I. M. BEDTools: a flexible suite of utilities for comparing genomic  
519 features. *Bioinformatics* **26**, 841–2 (2010).
- 520 61. Kersey, P. J. *et al.* Ensembl Genomes 2016: more genomes, more complexity. *Nucleic*  
521 *Acids Res.* **44**, D574–D580 (2016).

- 522 62. RStudio, Inc., Boston, M. RStudio: Integrated Development for R. Available at:  
523 <https://www.rstudio.com/>. (Accessed: 4th March 2019)
- 524 63. R: A Language and Environment for Statistical Computing. R Foundation for Statistical  
525 Computing. Available at: <https://www.r-project.org/about.html>. (Accessed: 4th March  
526 2019)
- 527 64. Love, M. I., Huber, W. & Anders, S. Moderated estimation of fold change and  
528 dispersion for RNA-seq data with DESeq2. *Genome Biol.* **15**, 550 (2014).
- 529 65. Yamashita, H. *et al.* Single-Molecule Imaging on Living Bacterial Cell Surface by High-  
530 Speed AFM. *J. Mol. Biol.* **422**, 300–309 (2012).
- 531 66. Hoffmann, M. *et al.* Complete Genome Sequence of a Multidrug-Resistant *Salmonella*  
532 *enterica* Serovar Typhimurium var. 5- Strain Isolated from Chicken Breast. *Genome*  
533 *Announc.* **1**, (2013).
- 534 67. Silva, C., Calva, E., Puente, J. L., Zaidi, M. B. & Vinuesa, P. Complete Genome  
535 Sequence of *Salmonella enterica* Serovar Typhimurium Strain SO2 (Sequence Type  
536 302) Isolated from an Asymptomatic Child in Mexico. *Genome Announc.* **4**, (2016).
- 537 68. Hong, Y., Liu, M. A. & Reeves, P. R. Progress in Our Understanding of Wzx Flippase  
538 for Translocation of Bacterial Membrane Lipid-Linked Oligosaccharide. *J. Bacteriol.*  
539 **200**, e00154-17 (2018).
- 540 69. Hapfelmeier, S. *et al.* The *Salmonella* Pathogenicity Island (SPI)-2 and SPI-1 Type III  
541 Secretion Systems Allow *Salmonella* Serovar *typhimurium* to Trigger Colitis via  
542 MyD88-Dependent and MyD88-Independent Mechanisms. *J. Immunol.* **174**, 1675–  
543 1685 (2005).
- 544 70. Maier, L. *et al.* Microbiota-derived hydrogen fuels *Salmonella typhimurium* invasion of  
545 the gut ecosystem. *Cell Host Microbe* **14**, 641–51 (2013).
- 546 71. Suar, M. *et al.* Virulence of Broad- and Narrow-Host-Range &lt;em>&lt;/em>*Salmonella*  
547 *enterica*&lt;/em>; Serovars in the Streptomycin-Pretreated Mouse Model. *Infect.*  
548 *Immun.* **74**, 632 LP – 644 (2006).
- 549 72. Fransen, F. *et al.* BALB/c and C57BL/6 Mice Differ in Polyreactive IgA Abundance,  
550 which Impacts the Generation of Antigen-Specific IgA and Microbiota Diversity.  
551 *Immunity* **43**, 527–540 (2015).

## 554 Acknowledgements

555 OH acknowledges Heiko Käßner for recording NMR spectra, Regina Engel for  
556 GLC-MS, and Katharina Jakob and Sylvia Düpow for technical support. We  
557 want to thank Magdalena Schneider, Christine Kiessling, Elisabeth Schultheiss,  
558 Rosa-Maria Vesco and Clarisse Straub for the DNA extraction, library  
559 preparations and sequencing of the bacterial isolates. MD acknowledges  
560 Delphine Cornillet and the group of Prof. Dirk Bumann for serum resistance  
561 measurements.

562 ES, WDH and MD acknowledge Prof. Markus Aebi, Prof. Martin Loessner, Dr.  
563 Joshua Cherry and the group of Dr. Alexander Harms for their helpful  
564 discussion and insight, as well as members of the Hardt, Slack, and Diard  
565 groups for their comments. They further acknowledge the staff of the ETH

566 Phenomics Centre and Rodent Centre HCI for support for animal  
567 experimentation.

568

### 569 **Author contributions**

570 MD, WDH and ES designed the project and wrote the paper. MD and ES  
571 designed and carried out experiments relating to vaccination and infection of  
572 mice, re-isolation of S.Tm clones, phenotyping of S.Tm clones by flow  
573 cytometry and gel electrophoresis, characterization of human monoclonal  
574 antibodies, analysis of antibody titres, and analysis of fitness of O-antigen  
575 variants of S.Tm *in vitro* and *in vivo*. MvdW, BHM, CL, RM contributed to  
576 experimental design / data interpretation. GZ carried out HR-MAS NMR  
577 analysis, OH carried out proton NMR analysis. MA generated the mathematical  
578 model for O:12 switching. JA carried out and analysed all AFM imaging. AR,  
579 NAB carried out phage-sensitivity assays. AE, FB, DW carried out Illumina  
580 whole-genome resequencing of re-isolated S.Tm isolates. EB, VL, DH, FB,  
581 KSM, SA carried out S.Tm challenge infections in vaccinated mice and  
582 analysed re-isolated clones. AH carried out microfluidic video microscopy of  
583 O:12 switching. PV and LF carried out methylome analysis of re-isolated S.Tm  
584 clones. LP, AL and BMS generated novel antibody reagents. All authors  
585 critically reviewed the manuscript.

586

### 587 **Funding**

588 MD is supported by a SNF professorship (PP00PP\_176954) and Gebert Rüt  
589 Microbials (PhagoVax GRS-093/20). ES acknowledges the support of the  
590 Swiss National Science Foundation (40B2-0\_180953, 310030\_185128, NCCR

591 Microbiomes), European Research Council Consolidator Grant, and Gebert Rüt  
592 Microbials (GR073\_17). MD and ES acknowledge the Botnar Research Centre  
593 for Child Health Multi-Investigator Project 2020. BMS acknowledges the  
594 support of R01 AI041239/AI/NIAID NIH HHS/United States. WDH  
595 acknowledges support by grants from the Swiss National Science Foundation  
596 (SNF; 310030B-173338, 310030\_192567, NCCR Microbiomes), the  
597 Promedica Foundation, Chur, the Gebert Rüt Foundation (Displacing ESBL,  
598 with AE) and the Helmut Horten Foundation. EB is supported by a Boehringer  
599 Ingelheim Fonds PhD fellowship. BM acknowledges support by the Swiss  
600 National Science Foundation (200020\_159707).

601 **Competing Interests Statement**

602 M.D. W-D.H. and E.S. declare that Evolutionary Trap Vaccines are covered by  
603 European patent application EP19177251. No other authors declare any  
604 competing interests.

605

606

607 **Figures**

608

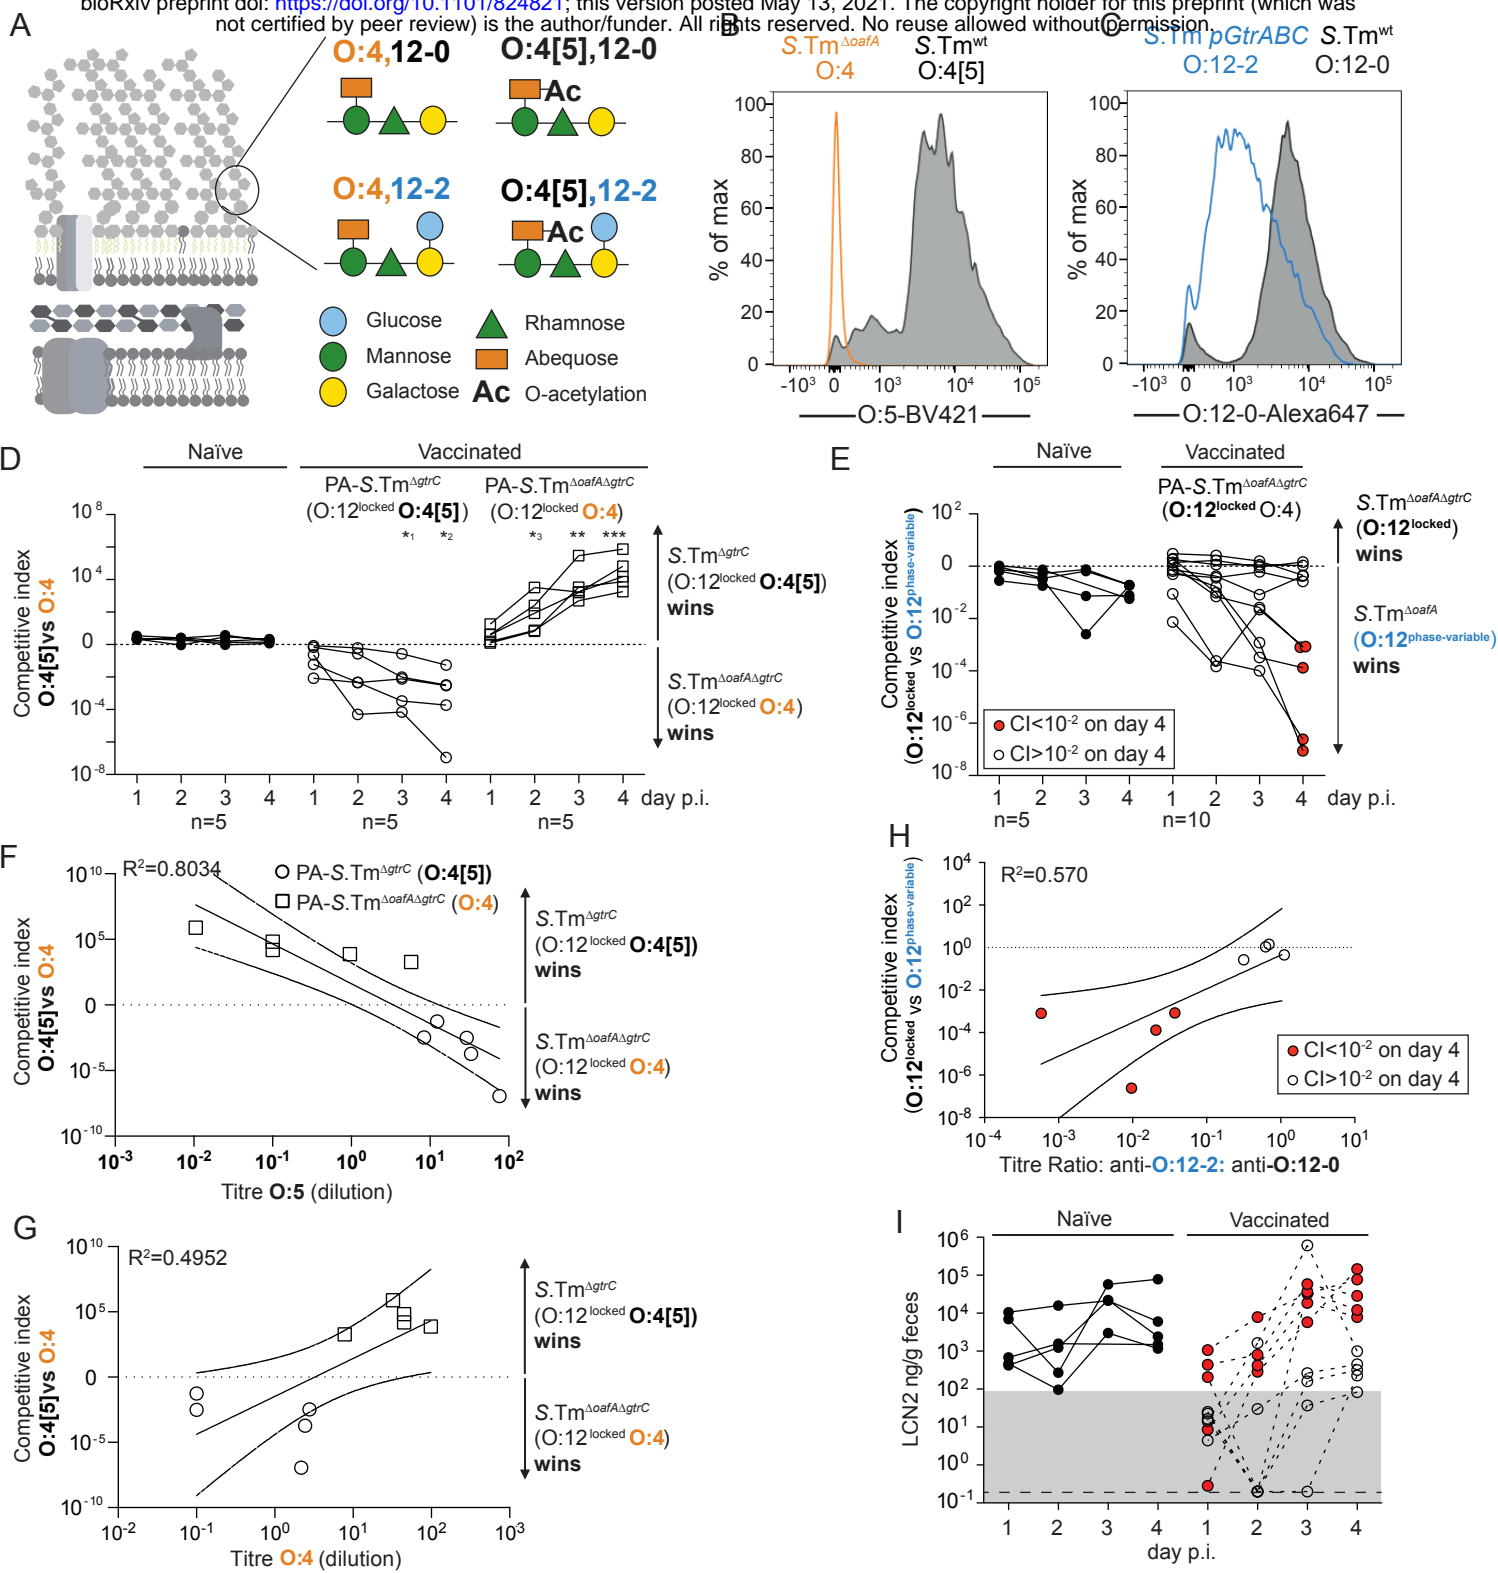

Figure 1: Vaccine-induced IgA exerts a strong selective pressure on O-antigen variants during murine non-Typhoidal Salmonellosis

609 **Figure 1: Vaccine-induced IgA exerts a strong selective pressure on O-**  
610 **antigen variants during murine non-Typhoidal Salmonellosis: A.**  
611 Schematic of the O-antigen of S.Tm (O:4[5],12), and its common variants  
612 depicted using the "Symbol Nomenclature for Glycans". **B and C.** Overnight  
613 cultures of the indicated S.Tm strains were stained for presence of O:5 (**B**) or  
614 O:12-0 (**C**) epitopes. **(D-I)** Naïve and vaccinated C57BL/6 mice were  
615 streptomycin-pretreated and infected with the indicated combination of S.Tm  
616 strains. **(D,F,G)** Naïve (closed circles, n=5), PA-S.Tm<sup>ΔgtrC</sup>-vaccinated (O:4[5]-  
617 vaccinated, open circles, n=5) and PA-S.Tm<sup>ΔgtrCΔoafA</sup>-vaccinated (O:4-  
618 vaccinated, open squares, n=5) SPF mice were streptomycin-pretreated,  
619 infected (10<sup>5</sup> CFU, 1:1 ratio of S.Tm<sup>ΔgtrC</sup> and S.Tm<sup>ΔgtrC ΔoafA</sup> per os). **D.**  
620 Competitive index (CFU S.Tm<sup>ΔgtrC</sup>/CFU S.Tm<sup>ΔgtrC ΔoafA</sup>) in feces at the indicated  
621 time-points. Two-way ANOVA with Bonferroni post-tests on log-normalized  
622 values, compared to naive mice. \*<sup>1</sup>p=0.0443, \*<sup>2</sup>p=0.0257, \*<sup>1</sup>p=0.0477,  
623 \*\*p=0.0021, \*\*\*p=0.0009 **F and G.** Correlation of the competitive index with the  
624 O:4[5]-binding (**F**) and O:4-binding (**G**) intestinal IgA titre, r<sup>2</sup> values of the linear  
625 regression of log-normalized values. Open circles: Intestinal IgA from O:4[5]-  
626 vaccinated mice, Open squares: Intestinal IgA from O:4-vaccinated mice. Lines  
627 indicate the best fit with 95% confidence interval. **E,H, I.** Naïve (closed circles,  
628 n=5) or PA-S.Tm<sup>ΔoafA ΔgtrC</sup>-vaccinated (O:4/O:12-0-vaccinated, open circles  
629 and red circles, n=10) C57BL/6 mice were streptomycin-pretreated and infected  
630 (10<sup>5</sup> CFU, 1:1 ratio of S.Tm<sup>ΔoafA</sup> (O:12-2 switching) and S.Tm<sup>ΔoafA ΔgtrC</sup> (O:12-  
631 locked) per os). **E.** Competitive index (CFU S.Tm<sup>ΔoafA ΔgtrC</sup>/CFU S.Tm<sup>ΔoafA</sup>) in  
632 feces at the indicated time-points. Red circles indicate vaccinated mice with a  
633 competitive index below 10<sup>-2</sup> on d4 and are used to identify these animals in  
634 panels **H and I.** **E** Effect of vaccination is not significant by 2-way ANOVA  
635 considering vaccination over time. **H.** Correlation of the competitive index on  
636 day 4 with the ratio of intestinal IgA titre against an O:12-2-locked S.Tm  
637 *pgtrABC* variant to the titre against an O:12-0-locked S.Tm<sup>GtrC</sup> variant (linear  
638 regression of log-normalized values, lines indicate the best fit with 95%  
639 confidence interval). **I.** Intestinal inflammation, corresponding to mice in panel  
640 **E**, quantified by measuring Fecal Lipocalin 2 (LCN2).  
641  
642

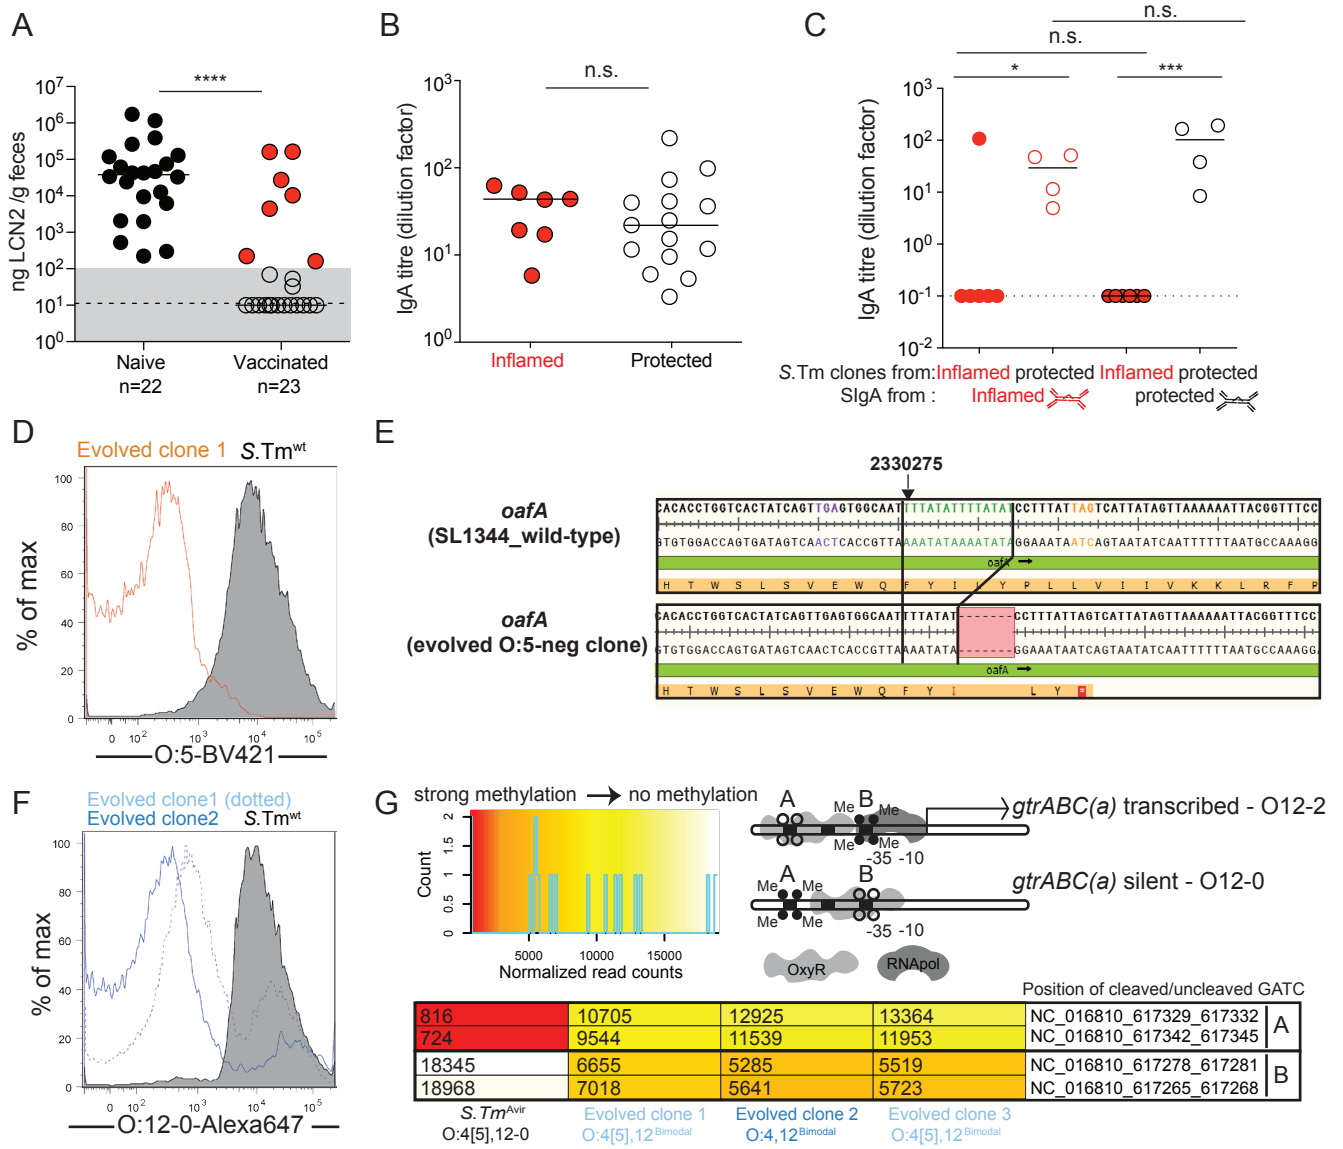

Figure 2: O-Antigen variants rapidly emerge during wild type S.Tm infection of vaccinated mice



643 **Figure 2: O-Antigen variants rapidly emerge during wild type S.Tm**  
644 **infection of vaccinated mice: A-C** : Naïve (n=22) or PA-S.Tm-vaccinated  
645 (Vaccinated, n=23) SPF C57BL/6 mice were streptomycin-pretreated, infected  
646 ( $10^5$  S.Tm<sup>wt</sup> Colony forming units (CFU) per os) and analyzed 18 h later. **A.**  
647 Fecal Lipocalin 2 (LCN2) to quantify intestinal inflammation, 2-tailed Mann  
648 Whitney U test  $p < 0.0001$  **B.** Intestinal IgA titres against S.Tm<sup>wt</sup> determined by  
649 flow cytometry, for vaccinated mice with LCN2 values below (open symbols,  
650 protected) and above (filled symbols, inflamed) 100ng/g.  $p = 0.61$  by 2-tailed  
651 Mann Whitney U test. **C.** Titres of intestinal lavage IgA from an “inflamed  
652 vaccinated” mouse (red borders) or a “protected vaccinated” mouse (black  
653 borders) against S.Tm clones re-isolated from the feces of the “inflamed  
654 vaccinated” mouse (red filled circles) or “protected vaccinated” mouse (open  
655 circles) at day 3 post-infection. Two-way ANOVA with Bonferroni post-tests on  
656 log-normalized data. Clones and lavages from n=1 mouse, representative of 9  
657 “vaccinated but inflamed” and 13 “vaccinated protected” mice, summarized in  
658 Table S4. \* $p = 0.0156$ , \*\*\* $p = 0.0003$ . **D.** Flow cytometry staining of S.Tm<sup>wt</sup> and  
659 an evolved with anti-O:5 typing sera (gating as in Fig. S1). **E.** Alignment of the  
660 *oafA* sequence from wild type (SL1344\_RS11465) and an example O:5-  
661 negative evolved clone showing the 7bp contraction leading to premature stop  
662 codon (all four re-sequenced O:5-negative strains showed the same deletion).  
663 **F.** Binding of an O:12-0-specific monoclonal antibody to S.Tm<sup>wt</sup> and O:12<sup>Bimodal</sup>  
664 evolved clones, determined by bacterial flow cytometry. (gating as in Fig. S1).  
665 **G.** Methylation status of the *gtrABC* promoter region in S.Tm, and three  
666 O:12<sup>Bimodal</sup> evolved clones determined by REC-seq. Heat-scale for normalized  
667 read-counts, schematic diagram of promoter methylation associated with ON  
668 and OFF phenotypes, and normalized methylation read counts for the indicated  
669 strains.  
670  
671

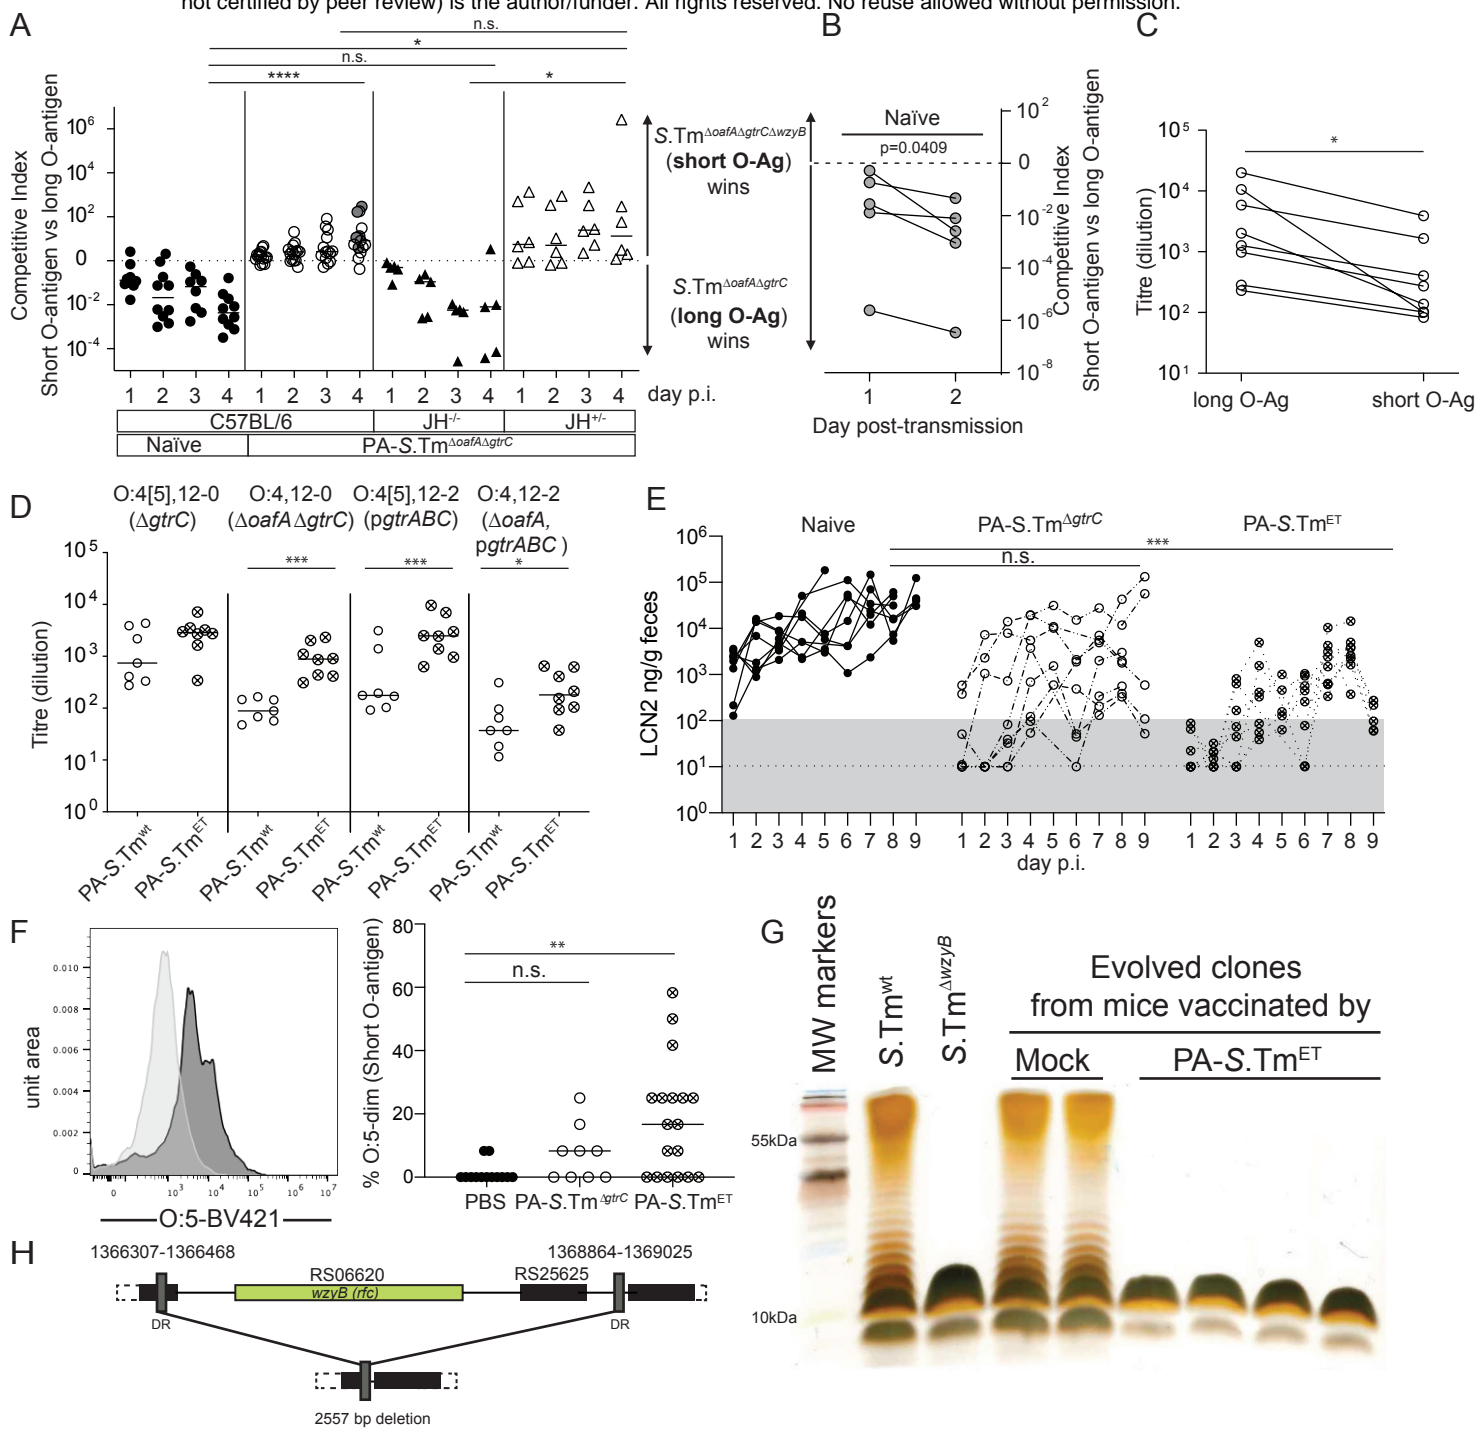

672 **Figure 3: Single-repeat O-antigen confers a selective advantage in the**  
673 **presence of broad-specificity vaccine-induced IgA: A-C.** Mock-vaccinated  
674 wild type (C57BL/6, n=10), PA-S.Tm<sup>ΔoafA ΔgtrC</sup>-vaccinated JH<sup>-/-</sup> mice (JH<sup>-/-</sup>, n=6),  
675 PA-S.Tm<sup>ΔoafA ΔgtrC</sup>-vaccinated wild type (C57BL/6, n=16) and PA-S.Tm<sup>ΔoafA ΔgtrC</sup>  
676 -vaccinated JH<sup>+/-</sup> littermate controls (JH<sup>+/-</sup>, n=5 mice) were streptomycin pre-  
677 treated and infected with 10<sup>5</sup> CFU of a 1:1 ratio S.Tm<sup>ΔoafA ΔgtrC ΔwzyB</sup> and  
678 S.Tm<sup>ΔoafA ΔgtrC</sup> i.e. serotype-locked, short and long O-antigen-producing strains.  
679 **A.** Competitive index of S.Tm in feces on the indicated days. 2-way ANOVA  
680 with Tukey's multiple comparisons tests. \*p=0.0392, \*\*\*\*p<0.0001. **B.** Feces  
681 from the indicated mice (grey-filled circles panel **A**) were transferred into  
682 streptomycin-pretreated C57BL/6 naive mice (one fecal pellet per mouse, n=5).  
683 Competitive index in feces over 2 days of infection. **C.** Intestinal IgA titre from  
684 PA-S.Tm<sup>ΔoafA ΔgtrC</sup>-vaccinated mice binding to S.Tm<sup>ΔoafA ΔgtrC</sup> (long O-antigen)  
685 and S.Tm<sup>ΔoafA ΔgtrC ΔwzyB</sup> (short O-antigen). \*p=0.0078 by 2-tailed Wilcoxon  
686 matched-pairs signed rank test. **D.** Intestinal IgA titre induced by PA-S.Tm<sup>wt</sup> or  
687 PA-S.Tm<sup>ET</sup> (4-strains) in 129S1/SvImJ mice determined by bacterial flow  
688 cytometry. Two-way ANOVA with Bonferroni multiple comparisons tests.  
689 Adjusted p values \*p=0.0332, \*\*\*p=0.0007. (Gating Fig.S5, further data Fig. S7  
690 and S8) **E.** 129S1/SvImJ Mice were vaccinated with vehicle only (Naïve, n=8),  
691 PA-S.Tm<sup>wt</sup> (n=8), PA-S.Tm<sup>ET</sup> (n=8). On day 28 after the first vaccination, mice  
692 were streptomycin pre-treated and challenged with 10<sup>5</sup> S.Tm<sup>wt</sup> orally. Intestinal  
693 inflammation as scored by fecal Lipocalin-2 (LCN2) days 1-9 post-infection.  
694 Dotted line = detection limit. Grey box = normal range in healthy mice. 2-way  
695 repeat-measures ANOVA with Tukey's multiple comparison test. \*\*\* adjusted p  
696 value=0.0002 **F.** Representative plot of O:5 staining in an evolved clone with  
697 short O-antigen and quantification of the percentage of O:5-dim S.Tm clones  
698 re-isolated from the feces of infected SPF mice vaccinated with PBS only  
699 (n=13), PA-S.Tm<sup>ΔgtrC</sup> (n=9) or PA-S.Tm<sup>ET</sup> (n=18). Kruskal-Wallis test with  
700 Dunn's multiple comparison tests shown. \*\*p=0.0016. (gating as Fig. S1) **G.**  
701 Silver-stained gel of LPS from representative control and evolved S.Tm strains  
702 from 2 different control and vaccinated PA-S.Tm<sup>ET</sup> mice. **H.** Resequencing of  
703 short O-antigen strains revealed a deletion between inverted repeats (n=5  
704 clones, isolated from 2 different mice).  
705  
706

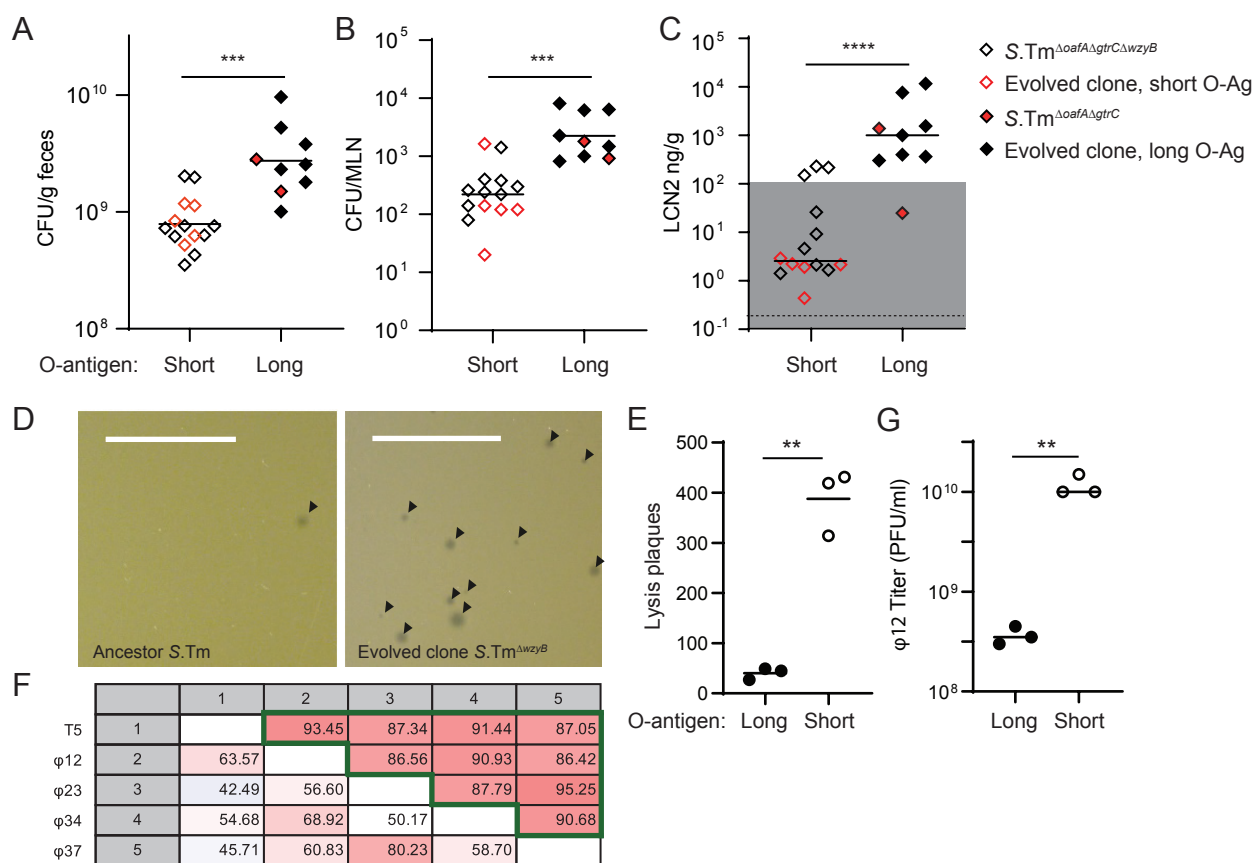

Figure 4: Single-repeat O-antigen mutants arising during infection of vaccinated mice have attenuated virulence, fitness and diminished resistance to phage predation

707 **Figure 4: Single-repeat O-antigen mutants arising during infection of**  
708 **vaccinated mice have attenuated virulence, fitness and diminished**  
709 **resistance to phage predation.**

710 **A, B, C**, Single 24h infections in streptomycin pretreated naïve C57BL/6 mice  
711 (n=14, short O-antigen, n=9 long O-antigen). Evolved and synthetic *wzyB*  
712 mutants have reduced ability to colonize the gut (**A**, CFU/g feces, \*\*\*p=0.0002)  
713 and to spread systemically (**B**, CFU per mesenteric lymph node (MLN),  
714 \*\*\*p=0.0001). This translates into diminished propensity to trigger intestinal  
715 inflammation in comparison to isogenic wild type strains (**C**, fecal Lipocalin 2  
716 (LCN2), \*\*\*\*p<0.0001). Mann-Whitney U, 2-tailed tests. **D**. Phage plaques on a  
717 lawn of ancestor *S. Tm*<sup>wt</sup> (left) and evolved *S. Tm*<sup>ΔwzyB</sup> (right) after infection with  
718 filtered wastewater; scale=1cm. **E**. Quantification of the plaques from three  
719 independent experiments (2-tailed Paired T test \*\*p=0.0046). **F**. Pairwise  
720 comparison matrix of *de novo* assembled and aligned genomes of isolated  
721 bacteriophages (φ12, φ23, φ34, φ37) and a reference sequence from  
722 *Enterobacteriaceae* phage T5 (NC\_005859). Values indicate the alignment  
723 percentage (comparisons below diagonal) between genomes and the average  
724 nucleotide identity between the aligned parts (comparisons above diagonal,  
725 green frame). This analysis shows that the four isolated bacteriophages are  
726 different but all belong to the T5 family. **G**. Quantification of phage plaques  
727 formed on infection of the ancestor *S. Tm*<sup>wt</sup> (long O-antigen) and evolved  
728 *S. Tm*<sup>ΔwzyB</sup> (short O-antigen) with the isolated phage φ12. 2-tailed Mann-  
729 Whitney U test. \*\*p=0.0041.  
730

731 **Materials and Methods**

732 **Ethics statement**

733 All animal experiments were approved by the legal authorities (licenses 223/2010,  
734 222/2013, 193/2016, 120/2019; Kantonales Veterinäramt Zürich, Switzerland). All  
735 experiments involving animals were carried out strictly in accordance with the legal  
736 framework and ethical guidelines.

737

738 **Mice**

739 Unless otherwise stated, all experiments used specific opportunistic pathogen-free  
740 (SPF, containing a complete microbiota free of an extended list of opportunistic  
741 pathogens) C57BL/6 mice. IgA<sup>-/-40</sup>, Balb/c, JH<sup>-/-41</sup>, Rag1<sup>-/-42</sup> (all C57BL/6 background)  
742 and 129S1/SvImJ, mice, were re-derived into a specific pathogen-free (SPF) foster  
743 colony to normalize the microbiota and bred under full barrier conditions in  
744 individually ventilated cages in the ETH Phenomics Center (EPIC, RCHCI), ETH  
745 Zürich and were fed a standard chow diet. Low complex microbiota (LCM) mice  
746 (IgA<sup>+/-</sup> and <sup>-/-</sup>, used in Fig. ED2) are ex-germfree mice, which were colonized with a  
747 naturally diversified Altered Schaedler flora in 2007<sup>14</sup> and were bred in individually  
748 ventilated cages or flexible-film isolators at this facility, and received identical diet. All  
749 mouse facilities were regulated to maintain constant temperature (22°C +/- 1°C) and  
750 humidity (30-50%), with a 12h/12h standard dark/light cycle. Male and female mice

751 were included in all experimental groups, and the number of animals per group is  
752 indicated in each figure legend.

753

754 Vaccinations and chronic infections with attenuated *Salmonella* strains in naïve mice  
755 were started between 5 and 6 weeks of age, and males and females were randomized  
756 between groups to obtain identical ratios wherever possible. Challenge infections with  
757 virulent *Salmonella* were carried out between 9 and 12 weeks of age. As strong  
758 phenotypes were expected, we adhered to standard practice of analysing at least 5 mice  
759 per group. Researchers were not blinded to group allocation.

760

### 761 **Strains and plasmids**

762 All strains and plasmids used in this study are listed **Table S1**.

763 For cultivation of bacteria, we used lysogeny broth (LB) containing appropriate  
764 antibiotics (i.e., 50 µg/ml streptomycin (AppliChem); 6 µg/ml chloramphenicol  
765 (AppliChem); 50 µg/ml kanamycin (AppliChem); 100 µg/ml ampicillin (AppliChem)).  
766 Dilutions were prepared in Phosphate Buffer Saline (PBS, Difco).

767 In-frame deletion mutants (e.g. *gtrC::cat*) were performed by  $\lambda$  *red* recombination as  
768 described in<sup>43</sup>. When needed, antibiotic resistance cassettes were removed using the  
769 temperature-inducible FLP recombinase encoded on pCP20<sup>43</sup>. Mutations coupled with  
770 antibiotic resistance cassettes were transferred into the relevant genetic background by  
771 generalized transduction with bacteriophage P22 HT105/1 *int-201*<sup>44</sup>. Primers used for  
772 genetic manipulations and verifications of the constructions are listed **Table S2**.  
773 Deletions of *gtrA* and *gtrC* originated from in-frame deletions made in *S.Tm* 14028S,  
774 kind gifts from Prof. Michael McClelland (University of California, Irvine), and were  
775 transduced into the SB300 genetic background.

776

777 The *gtrABC* operon (STM0557-0559) was cloned into the pSC101 derivative plasmid  
778 pM965<sup>45</sup> for constitutive expression. The operon *gtrABC* was amplified from the  
779 chromosome of SB300 using the Phusion Polymerase (ThermoFisher Scientific) and  
780 primers listed **Table S2**. The PCR product and pM965 were digested with PstI-HF and  
781 EcoRV-HF (NEB) before kit purification (SV Gel and PCR Clean up System, Promega)  
782 and ligation in presence of T4 ligase (NEB) following manufacturer recommendations.  
783 The ligation product was transferred by electro-transformation in competent SB300  
784 cells.

785

### 786 **Targeted sequencing**

787 Targeted re-sequencing by the Sanger method (Microsynth AG) was performed on kit  
788 purified PCR products (Promega) from chromosomal DNA or expression vector  
789 templates using pre-mixed sequencing primers listed **Table S2**.

790

### 791 **Whole-genome re-sequencing of O:12<sup>Bimodal</sup> isolates**

792 The genomes of *S.Tm* and evolved derivatives were fully sequenced by the Miseq  
793 system (2x300bp reads, Illumina, San Diego, CA) operated at the Functional Genomic  
794 Center in Zürich. The sequence of *S.Tm* SL1344 (NC\_016810.1) was used as reference.

795 Quality check, reads trimming, alignments, SNPs and indels calling were performed  
796 using the bioinformatics software CLC Workbench (Qiagen).

797

### 798 **Whole-genome sequencing of *S.Tm* isolates from "Evolutionary Trap" vaccinated** 799 **mice and variant calling.**

800 Nextera XT libraries were prepared for each of the samples. The barcoded libraries  
801 were pooled into equimolar concentrations following manufacturer's guidelines  
802 (Illumina, San Diego, CA) using the Mid-Output Kit for paired-end sequencing (2×150  
803 bp) on an Illumina NextSeq500 sequencing platform. Raw data (mean virtual coverage  
804 361x) was demultiplexed and subsequently clipped of adapters using Trimmomatic  
805 v0.38 with default parameters<sup>46</sup>. Quality control passing read-pairs were aligned against  
806 reference genome/plasmids (Accession numbers: NC\_016810.1, NC\_017718.1,  
807 NC\_017719.1, NC\_017720.1) with bwa v0.7.17<sup>47</sup>. Genomic variant were called using  
808 Pilon v1.23<sup>48</sup>. with the following parameters: (i) minimum coverage 10x; (ii) minimum  
809 quality score = 20; (iii) minimum read mapping quality = 10. SnpEff v4.3 was used to  
810 annotate variants according to NCBI and predict their effect on genes<sup>49</sup>.

811

### 812 **PA-STm vaccinations**

813 Peracetic acid killed vaccines were produced as previously described<sup>28</sup>. Briefly,  
814 bacteria were grown overnight to late stationary phase, harvested by centrifugation and  
815 re-suspended to a density of 10<sup>9</sup>-10<sup>10</sup> per ml in sterile PBS. Peracetic acid (Sigma-  
816 Aldrich) was added to a final concentration of 0.4% v/v. The suspension was mixed  
817 thoroughly and incubated for 60 min at room temperature. Bacteria were washed once  
818 in 40 ml of sterile 10x PBS and subsequently three times in 50 ml sterile 1x PBS. The  
819 final pellet was re-suspended to yield a density of 10<sup>11</sup> particles per ml in sterile PBS  
820 (determined by OD600) and stored at 4°C for up to three weeks. As a quality control,  
821 each batch of vaccine was tested before use by inoculating 100 µl of the killed vaccine  
822 (one vaccine dose) into 300 ml LB and incubating over night at 37 °C with aeration.  
823 Vaccine lots were released for use only when a negative enrichment culture had been  
824 confirmed. For all vaccination, 10<sup>10</sup> particles, suspended in 100µl PBS were delivered  
825 by oral gavage, once weekly for 4 weeks. Where multiple strains were combined, the  
826 total number of vaccine particles remained constant, and was roughly equally divided  
827 between the constituent strains. Unless otherwise stated, PA-STm vaccinated mice were  
828 challenged orally on d28 after the first vaccination.

829

### 830 **Adoptive transfer of recombinant mSTA121 IgA**

831 A recombinant monoclonal dimeric murine IgA specific for the O:12-0 epitope  
832 (described in <sup>15</sup>) was buffer-exchanged into sterile PBS. 1 mg of antibody was injected  
833 intravenously into mice 30 min prior to infection and again 12 h post-infection, to  
834 maintain sufficient dimeric IgA for export into the gut by PIgR.

835

### 836 **Chronic infection with live-attenuated vaccine strains of non-typhoidal *Salmonella***

837 6-week-old mice were orally pretreated 24 h before infection with 25 mg streptomycin.  
838 Live-attenuated strains (*sseD::aphT*, *ΔgrC ΔaroA* and *ΔoafA ΔgrC ΔaroA*, **Table S1**,

839 <sup>50</sup>) were cultivated overnight separately in LB containing streptomycin. Subcultures  
840 were prepared before infections by diluting overnight cultures 1:20 in fresh LB without  
841 antibiotics and incubation for 4 h at 37°C. The cells were washed in PBS, diluted, and  
842 50 µl of resuspended pellets were used to infect mice *per os* ( $5 \times 10^7$  CFU).  
843 Feces were sampled at day 1, 9 and 42 post-infection, homogenized in 1 ml PBS by  
844 bead beating (3mm steel ball, 25 Hz for 1 minute in a TissueLyser (Qiagen)), and *S.Tm*  
845 strains were enumerated by selective plating on MacConkey agar supplemented with  
846 streptomycin. Samples for lipocalin-2 measurements were kept homogenized in PBS at  
847 -20 °C. Enrichment cultures for analysis of O-antigen composition were carried out by  
848 inoculating 2 µl of fecal slurry into 5ml of fresh LB media and cultivating overnight at  
849 37 °C.

850

### 851 **Non-typhoidal *Salmonella* challenge infections**

852 Infections were carried out as previously described <sup>23</sup>. In order to allow reproducible  
853 gut colonization, 8-12 week-old SPF mice, naïve or PA-STm vaccinated, were orally  
854 pretreated 24 h before infection with 25 mg streptomycin or 20 mg of ampicillin. Strains  
855 were cultivated overnight separately in LB containing the appropriate antibiotics.  
856 Subcultures were prepared before infections by diluting overnight cultures 1:20 in fresh  
857 LB without antibiotics and incubation for 4 h at 37°C. The cells were washed in PBS,  
858 diluted, and 50 µl of resuspended pellets were used to infect mice *per os* ( $5 \times 10^5$  CFU).  
859 Competitions were performed by inoculating 1:1 mixtures of each competitor strain.  
860 Feces were sampled daily, homogenized in 1 ml PBS by bead beating (3 mm steel ball,  
861 25 Hz for 1 min in a TissueLyser (Qiagen)), and *S.Tm* strains were enumerated by  
862 selective plating on MacConkey agar supplemented with the relevant antibiotics. Fecal  
863 samples for lipocalin-2 measurements were kept homogenized in PBS at -20°C. At  
864 endpoint, intestinal lavages were harvested by flushing the ileum content with 2 ml of  
865 PBS using a cannula. The mesenteric lymph nodes, were collected, homogenized in  
866 PBS Tergitol 0.05% v/v at 25 Hz for 2 min, and bacteria were enumerated by selective  
867 plating.

868 Competitive indexes were calculated as the ratio of population sizes of each genotype,  
869 enumerated by selective plating of the two different strains on kanamycin- and  
870 chloramphenicol-containing agar, at a given time point, normalized for the ratio  
871 determined by selective plating in the inoculum (which was always between 0.5 and 2).

872

### 873 **Non-typhoidal *Salmonella* transmission**

874 Donor mice were vaccinated with PA-*S.Tm* <sup>$\Delta$ oafA  $\Delta$ gtrC</sup> once per week for 5 weeks,  
875 streptomycin pretreated (25 mg streptomycin *per os*), and gavaged 24 h later with  $10^5$   
876 CFU of a 1:1 mixture of *S. Tm* <sup>$\Delta$ oafA $\Delta$ gtrCwzyB::cat</sup> (Cm<sup>R</sup>) and *S. Tm* <sup>$\Delta$ oafA $\Delta$ gtrC</sup>Kan (Kan<sup>R</sup>). On  
877 day 4 post infection, the donor mice were euthanized, organs were harvested, and fecal  
878 pellets were collected, weighed and homogenized in 1 ml of PBS. The re-suspended  
879 feces (centrifuged for 10 s to discard large debris) were immediately used to gavage (as  
880 a 50 µl volume containing the bacteria from on fecal pellet) recipient naïve mice  
881 (pretreated with 25 mg streptomycin 24 hours before infection). Recipient mice were  
882 euthanized and organs were collected on day 2 post transmission. In both donor and



883 recipient mice, fecal pellets were collected daily and selective plating was used to  
884 enumerate *Salmonella* and determine the relative proportions (and consequently the  
885 competitive index) of both competing bacterial strains.

886

### 887 **Quantification of fecal Lipocalin2**

888 Fecal pellets collected at the indicated time-points were homogenized in PBS by bead-  
889 beating at 25 Hz, 1min. Large particles were sedimented by centrifugation at 300 g, 1  
890 min. The resulting supernatant was then analysed in serial dilution using the mouse  
891 Lipocalin2 ELISA duoset (R&D) according to the manufacturer's instructions.

892

### 893 **Analysis of specific antibody titres by bacterial flow cytometry**

894 Specific antibody titres in mouse intestinal washes were measured by flow cytometry  
895 as described<sup>15,51</sup>. Briefly, intestinal washes were collected by flushing the small  
896 intestine with 2 ml PBS, centrifuged at 16000 g for 30 min to clear all bacterial-sized  
897 particles. Aliquots of the supernatants were stored at -20°C until analysis. Bacterial  
898 targets (antigen against which antibodies are to be titred) were grown to late stationary  
899 phase or the required OD in 0.2µm-filtered LB, then gently pelleted for 2 min at 7000  
900 g. The pellet was washed with 0.2µm-filtered 1% BSA/PBS before re-suspending at a  
901 density of approximately 10<sup>7</sup> bacteria per ml. After thawing, intestinal washes were  
902 centrifuged again at 16000 g for 10 min to clear. Supernatants were used to perform  
903 serial dilutions. 25 µl of the dilutions were incubated with 25 µl bacterial suspension at  
904 4°C for 1 h. Bacteria were washed twice with 200 µl 1% BSA/PBS by centrifugation at  
905 7000g for 15 min, before resuspending in 25 µl of 0.2µm-filtered 1% BSA/PBS  
906 containing monoclonal FITC-anti-mouse IgA (BD Pharmingen, 10 µg/ml) or Brilliant  
907 violet 421-anti-IgA (BD Pharmingen, 10µg/ml). After 1 h of incubation, bacteria were  
908 washed once with 1% BSA/PBS as above and resuspended in 300 µl 1% BSA/PBS for  
909 acquisition on LSRII or Beckman Coulter Cytoflex S using FSC and SSC parameters  
910 to threshold acquisition in logarithmic mode. Data were analysed using FloJo  
911 (Treestar). After gating on bacterial particles, log-median fluorescence intensities  
912 (MFI) were plotted against lavage dilution factor for each sample and 4-parameter  
913 logistic curves were fitted using Prism (Graphpad, USA). Titers were calculated from  
914 these curves as the dilution factor giving an above-background signal (typically IgA  
915 coating MFI=1000 – e.g. Fig. S7 and S8).

916

### 917 **Dirty-plate ELISA analysis of intestinal lavage IgA titres specific for *S.Tm*.**

918 Bacterial targets (antigen against which antibodies are to be titred) were grown to late  
919 stationary phase in 0.2µm-filtered LB, then gently pelleted for 2 min at 7000 g. The  
920 pellet was washed with 0.2µm-filtered 1% BSA/PBS before re-suspending at a density  
921 of approximately 10<sup>9</sup> bacteria per ml in sterile PBS. 50µl of this bacterial suspension  
922 was added to each well of a Nunc Immunosorb ELISA plate and was incubated  
923 overnight at 4°C in a humidified chamber. The ELISA plates were then washed 3 times  
924 with PBS/0.5% Tween-20 and blocked with 200µl per well of 2% BSA in PBS for 3h.  
925 After thawing, intestinal washes were centrifuged again at 16000 g for 10 min to clear.  
926 Supernatants were used to perform serial dilutions. 50 µl of the dilutions were added to

927 each well and the plates were incubated at 4°C overnight in a humidified chamber. The  
928 next morning, the plates were washed 5 times with PBS/0.5% Tween-20 and 50µl of  
929 HRP-anti-mouse-IgA (Sigma-Aldrich, 1:1000) was added to each well. This was  
930 incubated for 1h at room temperature before washing again 5 times and developing the  
931 plates with 100µl per well of ABTS ELISA substrate. Absorbance at 405nm was read  
932 using a Tecan Infinite pro 200. A<sub>405</sub> readings were plotted against lavage dilution factor  
933 for each sample and 4-parameter logistic curves were fitted using Prism (Graphpad,  
934 USA). Titers were calculated from these curves as the dilution factor giving an above-  
935 background signal (A<sub>405</sub>=0.2 – e.g. Fig. S7 and S8).

936

### 937 **Flow cytometry for analysis of O:5, O:4 and O:12-0 epitope abundance on** 938 ***Salmonella* in cecal content, enrichment cultures and clonal cultures**

939 1 µl of overnight cultures made in 0.2µm-filtered LB, or 1µl of fresh feces or cecal  
940 content suspension (as above) was stained with 0.2µm-filtered solutions of STA5  
941 (human recombinant monoclonal IgG2 anti-O:12-0, 6µg/ml<sup>15</sup>), Rabbit anti-*Salmonella*  
942 O:5 (Difco, 1:200) or Rabbit anti-*Salmonella* O:4 (Difco, 1:5). After incubation at 4°C  
943 for 30 min, bacteria were washed twice by centrifugation at 7000g and resuspension in  
944 PBS/1% BSA. Bacteria were then resuspended in 0.2µm-filtered solutions of  
945 appropriate secondary reagents (Alexa 647-anti-human IgG, Jackson ImmunoResearch  
946 1:200, Brilliant Violet 421-anti-Rabbit IgG, Biolegend 1:200). This was incubated for  
947 10-60 min before cells were washed as above and resuspended for acquisition on a BD  
948 LSRII or Beckman Coulter Cytoflex S. A media-only sample was run on identical  
949 settings to ensure that the flow cytometer was sufficiently clean to identify bacteria  
950 without the need for DNA dyes. Median fluorescence intensity corresponding to O:12-  
951 0 or O:5 staining was calculated using FlowJo (Treestar, USA). Gates used to calculate  
952 the % of "ON" and "OFF" cells were set by gating on samples with known O:5/O:4  
953 (*oafA*-deletion) and O:12-0 (*gtrC*-deletion) versus O:12-2 (*pgtrABC*) phenotypes (Fig.  
954 S2 and 3).

955

### 956 **Live-cell immunofluorescence**

957 200 uL of an overnight culture was centrifuged and resuspended in 200 µL PBS  
958 containing 1 µg recombinant murine IgA clone STA121-AlexaFluor568. The cells and  
959 antibodies were co-incubated for 20 min at room temperature in the dark and then  
960 washed twice in 1 mL Lysogeny broth (LB). Antibody-labeled cells were pipetted into  
961 an in-house fabricated microfluidic device<sup>52</sup>. Cells in the microfluidic device were  
962 continuously fed *S.Tm*-conditioned LB<sup>52</sup> containing STA121-AlexaFluor568 (1  
963 µg/mL). Media was flowed through the device at a flow rate of 0.2 mL/h using syringe  
964 pumps (NE-300, NewEra PumpSystems). Cells in the microfluidic device were imaged  
965 on an automated Olympus IX81 microscope enclosed in an incubation chamber heated  
966 to 37°C. At least 10 unique positions were monitored in parallel per experiment. Phase  
967 contrast and fluorescence images were acquired every 3 min. Images were  
968 deconvoluted in MatLab<sup>53</sup>. Videos are compressed to 7 fps, i.e. 1 s = 21 mins.

969

## 970 **HR-MAS NMR**

971 *S. Typhimurium* cells were grown overnight (~18 h) to late stationary phase. The  
972 equivalent of 11–15 OD<sub>600</sub> was pelleted by centrifugation for 10 min 4 °C and 3750 g.  
973 The pellet was resuspended in 10% NaN<sub>3</sub> in potassium phosphate buffer (PPB; 10 mM  
974 pH 7.4) in D<sub>2</sub>O and incubated at room temperature for at least 90 min. The cells were  
975 then washed twice with PPB and resuspended in PPB to a final concentration of 0.2  
976 OD<sub>600</sub>/μl in PPB containing acetone (final concentration 0.1% (v/v) as internal  
977 reference). The samples were kept on ice until the NMR measurements were performed  
978 - i.e. for between 1 and 8 h. The HR-MAS NMR spectra were recorded in two batches,  
979 as follows: *S.Tm*<sup>WT</sup>, *S.Tm*<sup>ΔwbaP</sup>, *S.Tm*<sup>Evolved\_1</sup>, *S.Tm*<sup>Evolved\_2</sup> were measured on  
980 16.12.2016, *S.Tm*<sup>ΔoafA</sup> was measured on 26.7.2017.

981  
982 NMR experiments on intact cells were carried out on a Bruker Biospin AVANCE III  
983 spectrometer operating at 600 MHz <sup>1</sup>H Larmor frequency using a 4 mm HR-MAS  
984 Bruker probe with 50 μl restricted-volume rotors. Spectra were collected at a  
985 temperature of 27 °C and a spinning frequency of 3 kHz except for the sample of  
986 *S.Tm*<sup>ΔoafA</sup> (25°C, 2 kHz). The <sup>1</sup>H experiments were performed with a 24 ms Carr–  
987 Purcell–Meiboom–Gill (CPMG) pulse-sequence with rotor synchronous refocusing  
988 pulses every two rotor periods before acquisition of the last echo signal to remove broad  
989 lines due to solid-like material<sup>54</sup>. The 90° pulse was set to 6.5 μs, the acquisition time  
990 was 1.36 s, the spectral width to 20 ppm. The signal of HDO was attenuated using water  
991 pre-saturation for 2 s. 400 scans were recorded in a total experimental time of about 30  
992 minutes.

## 994 **O-Antigen purification and <sup>1</sup>H-NMR**

995 The LPS was isolated applying the hot phenol-water method<sup>55</sup>, followed by dialysis  
996 against distilled water until the phenol scent was gone. Then samples were treated with  
997 DNase (1mg/100 mg LPS) plus RNase (2 mg/100 mg LPS) at 37°C for 2 h, followed  
998 by Proteinase K treatment (1 mg/100 mg LPS) at 60°C for 1 h [all enzymes from Serva,  
999 Germany]. Subsequently, samples were dialyzed again for 2 more days, then freeze  
1000 dried. Such LPS samples were then hydrolyzed with 1% aqueous acetic acid (100°C,  
1001 90 min) and ultra-centrifuged for 16 h at 4°C and 150,000 g. Resulting supernatants  
1002 (the O-antigens) were dissolved in water and freeze-dried. For further purification, the  
1003 crude O-antigen samples were chromatographed on TSK HW-40 eluted with  
1004 pyridine/acetic acid/water (10/4/1000, by vol.), then lyophilized. On these samples, 1D  
1005 and 2D (COSY, TOCSY, HSQC, HMBC) <sup>1</sup>H- and <sup>13</sup>C-NMR spectra were recorded  
1006 with a Bruker DRX Avance 700 MHz spectrometer (<sup>1</sup>H: 700.75 MHz; <sup>13</sup>C: 176.2 MHz)  
1007 as described<sup>56</sup>.

1008

## 1009 **Atomic force microscopy**

1010 The indicated *S.Tm* strains were grown to late-log phase, pelleted, washed once with  
1011 distilled water to remove salt. A 20 μl of bacterial solution was deposited onto freshly  
1012 cleaved mica, adsorbed for 1 min and dried under a clean airstream. The surface of  
1013 bacteria was probed using a Dimension FastScan Bio microscope (Bruker) with Bruker

1014 AFM cantilevers in tapping mode under ambient conditions. The microscope was  
1015 covered with an acoustic hood to minimized vibrational noise. AFM images were  
1016 analyzed using the Nanoscope Analysis 1.5 software.

1017

### 1018 **Methylation analysis of *S.Tm* clones**

1019 For REC-Seq (restriction enzyme cleavage–sequencing) we followed the same  
1020 procedure described by Ardissonne et al, 2016<sup>57</sup>. In brief, 1 µg of genomic DNA from  
1021 each *S.Tm* was cleaved with MboI, a blocked (5'biotinylated) specific adaptor was  
1022 ligated to the ends and the ligated fragments were then sheared to an average size of  
1023 150-400 bp (Fasteris SA, Geneva, CH). Illumina adaptors were then ligated to the  
1024 sheared ends followed by deep-sequencing using a HiSeq Illumina sequencer, the 50  
1025 bp single end reads were quality controlled with FastQC v0.9  
1026 (<http://www.bioinformatics.babraham.ac.uk/projects/fastqc/>). To  
1027 remove  
1028 contaminating sequences, the reads were split according to the MboI consensus motif  
1029 (5'-GATC-3') considered as a barcode sequence using fastx\_toolkit v0.0.13.2  
1030 ([http://hannonlab.cshl.edu/fastx\\_toolkit/](http://hannonlab.cshl.edu/fastx_toolkit/)) (fastx\_barcode\_splitter.pl --bcfile  
1031 barcodelist.txt --bol --exact). A large part of the reads (60%) were rejected and 40%  
1032 kept for remapping to the reference genomes with bwa mem<sup>47</sup> v0.7.15 and samtools<sup>58</sup>  
1033 v0.1.19 to generate a sorted bam file. The bam file was further filtered to remove low  
1034 mapping quality reads (keeping AS >= 45) and split by orientation (alignmentFlag 0 or  
1035 16) with bamtools<sup>59</sup> v2.4.1. The reads were counted at 5' positions using Bedtools<sup>60</sup>  
1036 v2.26.0 (bedtools genomecov -d -5). Both orientation count files were combined into a  
1037 bed file at each identified 5'-GATC-3' motif using PERL script (perl v5.24). The MboI  
1038 positions in the bed file were associated with the closest gene using bedtools closest<sup>60</sup>  
1039 v2.26.0 and the gff3 file of the reference genomes<sup>61</sup>. The final bed file was converted  
1040 to an MS Excel sheet. The counts were loaded in RStudio v1.1.442<sup>62</sup> with R v3.4.4<sup>63</sup>  
1041 and analysed with the DESeq2 v1.18.1 package<sup>64</sup> comparing the reference strain with  
1042 the 3 evolved strains considered as replicates. The counts are analysed by genome  
1043 position rather than by gene. The positions are considered significantly differentially  
1044 methylated upon an adjusted p-value < 0.05. Of the 2607 GATC positions, only 4 were  
1045 found significantly differentially methylated and they are all located in the promoter of  
1046 the *gtrABC* operon.

1046 The first step in the reads filtering was to remove contaminant reads missing the GATC  
1047 consensus motif (MboI) at the beginning of the sequence. These contaminant reads are  
1048 due to random fragmentation of the genomic DNA and not to cuts of the MboI  
1049 restriction enzyme. Using fastx\_barcode\_splitter.pl v0.0.13.2 about 60% of the  
1050 reads were rejected because they did not start with GATC. The rest (40%) was  
1051 analyzed further. Random DNA shearing and blunt-ended ligation of adaptors,  
1052 combined with sequencing noise at the beginning of reads likely generates this high  
1053 fraction of reads missing at GTAC sequence.

1054

### 1055 ***gtrABC* expression analysis by blue/white screening and flow cytometry.**

1056 About 200 colonies of *S.Tm*<sup>*gtrABC-lacZ*</sup> (strain background 4/74, <sup>4</sup>) were grown from an  
1057 overnight culture on LB agar supplemented with X-gal (0.2 mg/ml, Sigma) in order to

1058 select for *gtrABC* ON (blue) and OFF clones (white). These colonies were then picked  
1059 to start pure overnight cultures. These cultures were diluted and plated on fresh LB agar  
1060 X-gal plate in order to enumerate the proportion of *gtrABC* ON and OFF siblings. The  
1061 proportion of O:12/O:12-2 cells was analyzed by flow cytometry.

1062

### 1063 ***In vitro* growth and competitions to determine *wzyB*-associated fitness costs**

1064 Single or 1:1 mixed LB subcultures were diluted 1000 times in 200  $\mu$ l of media  
1065 distributed in 96 well black side microplates (Costar). Where appropriate, wild type  
1066 *S.Tm* carried a plasmid for constitutive expression of GFP. To measure growth and  
1067 competitions in stressful conditions that specifically destabilize the outer membrane of  
1068 *S.Tm*, a mixture of Tris and EDTA (Sigma) was diluted to final concentration (4 mM  
1069 Tris, 0.4 mM EDTA) in LB; Sodium cholate (Sigma) and Sodium Dodecyl Sulfate  
1070 (SDS) (Sigma) were used at 2% and 0.05% final concentration respectively. The lid-  
1071 closed microplates were incubated at 37°C with fast and continuous shaking in a  
1072 microplate reader (Synergy H4, BioTek Instruments). The optical density was  
1073 measured at 600 nm and the green fluorescence using 491 nm excitation and 512 nm  
1074 emission filter wavelengths every 10 minutes for 18 h. Growth in presence of SDS  
1075 causes aggregation when cell density reaches OD=0.3-0.4, therefore, it is only possible  
1076 to compare the growth curves for about 250 minutes. The outcome of competitions was  
1077 determined by calculating mean OD and fluorescence intensity measured during the  
1078 last 100 min of incubation. OD and fluorescence values were corrected for the baseline  
1079 value measured at time 0.

1080

### 1081 **Serum resistance**

1082 Overnight LB cultures were washed three times in PBS, OD adjusted to 0.5 and  
1083 incubated with anonymized pooled human serum obtained from Unispital Basel (3 vol  
1084 of culture for 1 vol of serum) at 37°C for 1 h. Heat inactivated (56°C, 30 min) serum  
1085 was used as control treatment. Surviving bacteria were enumerated by plating on non-  
1086 selective LB agar plates. For this, dilutions were prepared in PBS immediately after  
1087 incubation.

1088

### 1089 **Bacteriophage sensitivity tests:**

1090 5 ml sewage water (sewage plant inflow treated with 1 % v/v chloroform; Basel Stadt,  
1091 Switzerland) were mixed with 500  $\mu$ l of dense bacterial culture (ancestor wild type *S.*  
1092 *Tm*; evolved short O-antigen *wzyB* mutant AE860.3, *S.Tm*<sup>*AgtrC oafA::cat*</sup>, *S.Tm*<sup>*AgtrC  $\Delta$ oafA*</sup>  
1093 <sup>*wzyB::cat*</sup>), incubated for 15 minutes at 37 °C. The mixtures were added to 15 ml LB  
1094 containing 10 mM CaCl<sub>2</sub>, 10 mM MgSO<sub>4</sub> and 0.7 % w/v agar, and immediately poured  
1095 onto LB agar plates with the appropriate antibiotics.

1096

1097 Sensitivity to isolated phage  $\phi$ 12 was quantified by calculating phage titres obtained  
1098 after overnight cultures of evolved short O-antigen *wzyB* mutant AE860.3 or ancestor  
1099 wild type *S. Tm* in presence of the isolated bacteriophage (MOI=10).

1100

### 1101 **Isolation of bacteriophages and resistant clones:**

1102 Plaques with different morphologies appearing on *S.Tm<sup>AgtrC ΔoafA wzyB::cat</sup>* plates were  
1103 streaked on overlay plates containing *S.Tm<sup>AgtrC ΔoafA wzyB::cat</sup>*. The resulting plaques were  
1104 used to inoculate 200 μl of a *S.Tm<sup>AgtrC ΔoafA wzyB::cat</sup>* culture at OD<sub>600</sub>=0.3 in a 96-well  
1105 plate and optical density was measured every 10 minutes at 37 °C with shaking in a  
1106 Synergy 2 plate-reader. Well contents after 18 hours of growth were streaked onto LB-  
1107 Cm plates to isolate bacterial colonies from the regrowing population. Resistance to  
1108 phage was confirmed by testing for absence of plaque formation in presence of the  
1109 corresponding phage.

1110 The rest of the well contents were cleared by centrifugation and filtered (0.45 μm) for  
1111 phage purification. The cleared supernatants were used to inoculate 20 ml of a *S.Tm<sup>AgtrC</sup>*  
1112 *ΔoafA wzyB::cat* culture at OD<sub>600</sub>=0.3 and subsequently grown at 37 °C for 5 hours. Cell  
1113 debris was removed by centrifugation, the supernatants cleared by 0.45 μm filtration  
1114 and stored at 4 °C.

1115

### 1116 **Phage genome sequencing and analysis:**

1117 Phage DNA was isolated using the Phage DNA Isolation Kit from Norgen Biotek and  
1118 sequenced at MiGS, Pittsburgh, Pennsylvania, USA. For this, Nextera libraries were  
1119 prepared for each sample and sequenced on an Illumina NextSeq 550 sequencing  
1120 platform to generate paired end reads.

1121 De novo genome assembly was performed using the De Novo Assembly Algorithm of  
1122 CLC Genomics Workbench and the resulting high coverage contigs were aligned  
1123 using the Whole Genome Alignment Plug-In to calculate neighbor-joining trees and  
1124 corresponding pairwise comparison tables.

1125 Assembly of the phage genomes resulted in a single contig of 108,227 bp and 114,055  
1126 bp for φ12 and φ23, respectively (4,928 and 4,495-fold coverage). For φ34 four separate  
1127 contigs with more than 3000-fold coverage were identified (81,319, 12,250, 10,937,  
1128 5,594 bp), giving a total genome size of more than 100,100 bp, while for φ37 three  
1129 contigs with more than 1600-fold coverage (95,133, 14,559, 4,197 bp) gave a total  
1130 genome size of at least 113,889 bp.

1131 For comparison, enterobacteria phage T5 has a double-stranded linear DNA genome of  
1132 121,750 bp.

1133

### 1134 **Modeling antigen switching between O12 and O12-2**

1135 The aim of this modeling approach is to test whether a constant switching rate between  
1136 an O12 and an O12-2 antigen expression state can explain the experimentally observed  
1137 bimodal populations.

1138

1139 To this end, we formulated a deterministic model of population dynamics of the two  
1140 phenotypic states as:

1141

$$1142 \quad \frac{dO_{12}}{dt} = (\mu O_{12} - s_{\rightarrow 12-2} O_{12} + s_{\rightarrow 12} O_{12-2}) * \left( 1 - \frac{(O_{12} + O_{12-2})}{K} \right)$$

1143

$$1144 \quad \frac{dO_{12-2}}{dt} = (\mu O_{12-2} + s_{\rightarrow 12-2} O_{12} - s_{\rightarrow 12} O_{12-2}) * \left( 1 - \frac{(O_{12} + O_{12-2})}{K} \right)$$

1145

1146 where  $O_{12}$  and  $O_{12-2}$  denote the population sizes of the respective antigen variants,  $\mu$   
1147 denotes the growth rate, which is assumed to be identical for the two variants,  $K$   
1148 carrying capacity, and  $s_{\rightarrow 12-2}$  and  $s_{\rightarrow 12}$  the respective switching rates from  $O_{12}$  to  
1149  $O_{12-2}$  and from  $O_{12-2}$  to  $O_{12}$ . Growth, as well as the antigen switching rates, are scaled  
1150 with population size in a logistic way, so that all processes come to a halt when carrying  
1151 capacity is reached.

1152

1153 We use the model to predict the composition of a population after growth in LB  
1154 overnight, and therefore set the specific growth rate to  $\mu = 2.05h^{-1}$ , which  
1155 corresponds to a doubling time of roughly 20min. The carrying capacity is set to  $K =$   
1156  $10^9$  cells. We ran parameter scans for the switching rates  $s_{\rightarrow 12}$  and  $s_{\rightarrow 12-2}$ , with  
1157 population compositions that start either with 100% or 0%  $O_{12}$ , and measure the  
1158 composition of the population after 16h of growth (**Fig. S11C**). The initial population  
1159 size is set to  $10^4$  cells

1160

1161 Experimentally, we observe that when starting a culture with an  $O_{12}$  colony, after  
1162 overnight growth the culture is composed of around 90%  $O_{12}$  and 10%  $O_{12-2}$  cells,  
1163 whereas starting the culture with  $O_{12-2}$  cells yields around 50%  $O_{12}$  and 50%  $O_{12-2}$   
1164 cells after overnight growth (**Fig. S11B**). To explain this observation without a change  
1165 in switching rates, we would need a combination of values in  $s_{\rightarrow 12}$  and  $s_{\rightarrow 12-2}$  that  
1166 yield the correct population composition for both scenarios. In **Fig. S11D**, we plot the  
1167 values of  $s_{\rightarrow 12}$  and  $s_{\rightarrow 12-2}$  that yield values of 10%  $O_{12-2}$  (starting with 0%  $O_{12-2}$ ,  
1168 green dots) and 50%  $O_{12-2}$  (starting with 100%  $O_{12-2}$ , orange dots). The point clusters  
1169 intersect at  $s_{\rightarrow 12} = 0.144h^{-1}$  and  $s_{\rightarrow 12-2} = 0.037h^{-1}$  (as determined by a local linear  
1170 regression at the intersection point).

1171

1172 We then used the thus determined switching rates to produce a population growth curve  
1173 in a deterministic simulation, using the above equations for a cultures starting with  
1174 100%  $O_{12-2}$ , (**Fig. S11E**, Left-hand graph) and for a culture starting with 0%  $O_{12-2}$   
1175 (**Fig. S11E**, right-hand graph).

1176

1177 These switching rates are consistent with published values<sup>4</sup>. Our results show that the  
1178 observed phenotype distributions can be explained without a change in the rate of  
1179 switching between the phenotypes.

1180

### 1181 **Data availability**

1182 All Plotted data and associated raw numerical data and calculations for figure 1-4,  
1183 extended data fig. 1-10 and supplementary figures 1-10 is provided in source data tables  
1184 (one per figure, titled accordingly). Uncropped images are provided as supplementary  
1185 files.

1186 All raw flow cytometry data, ordered by figure, is publically available via the ETH  
1187 research collection doi: 10.3929/ethz-b-000477737

1188 All Illumina sequencing data data is publically available at NCBI BioProject  
1189 Accession: PRJNA720270

1190

### 1191 **Code availability**

1192 R code used to generate the figures shown in extended data figure 5 can be freely  
1193 downloaded from <https://github.com/marnoldini/evotrap>

1194

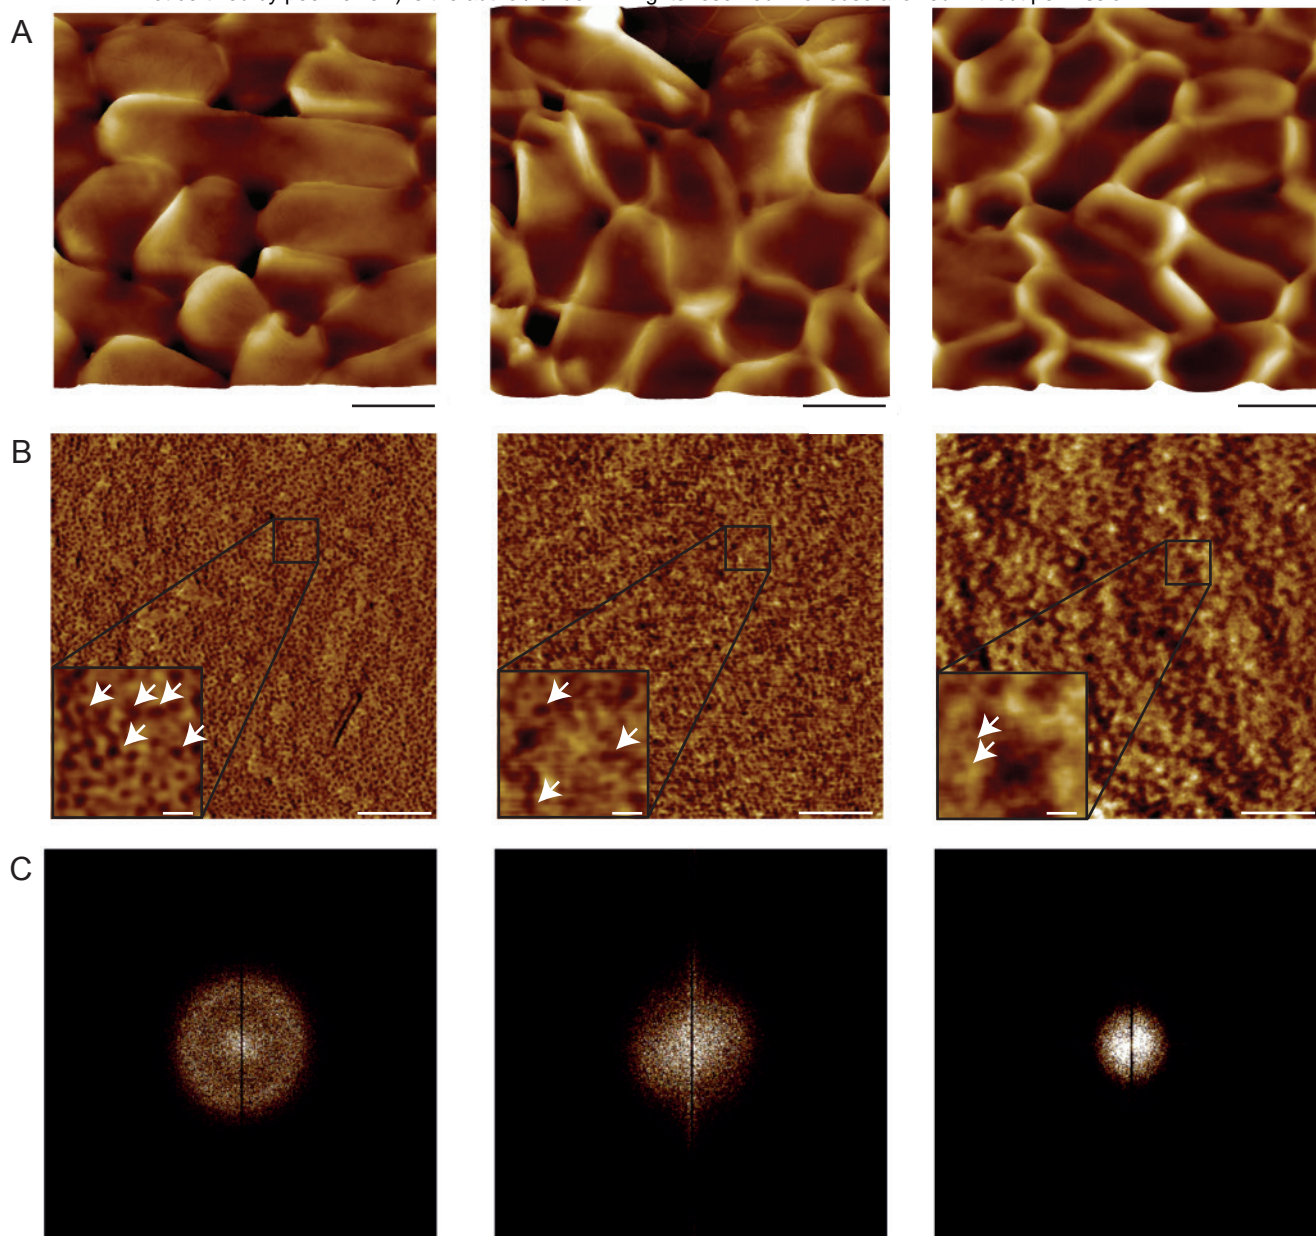

**Extended Data Fig. 1: Surface phenotype of *S.Tm* mutants**



1196 **Fig. ED1: Surface phenotype of *S.Tm* mutants: A-C.** Atomic force microscopy phase  
1197 images of *S.Tm*<sup>wt</sup>, *S.Tm*<sup>ΔwzyB</sup> (single-repeat O-antigen), and *S.Tm*<sup>ΔwbaP</sup> (rough mutant  
1198 - no O-antigen) at low magnification (A, uncropped image, scale bar = 1μm) and high  
1199 magnification (B and C, scale bar main image = 150nm, scale bar inset = 15nm).  
1200 Invaginations in the surface of *S.Tm*<sup>ΔwbaP</sup> (dark colour, B) show a geometry and size  
1201 consistent with outer membrane pores<sup>65</sup>. These are already less clearly visible on the  
1202 surface of *S.Tm*<sup>ΔwzyB</sup> with a single-repeat O-antigen, and become very difficult to  
1203 discern in *S.Tm*<sup>wt</sup>. One representative image of 3 for each genotype is shown. While  
1204 arrows point to features with consistent size and abundance to be exposed outer  
1205 membrane porins. C. Fast-Fourier transform of images shown in "B" demonstrating  
1206 clear regularity on the surface of *S.Tm*<sup>ΔwbaP</sup>, which is progressively lost when short and  
1207 long O-antigen is present.  
1208

A

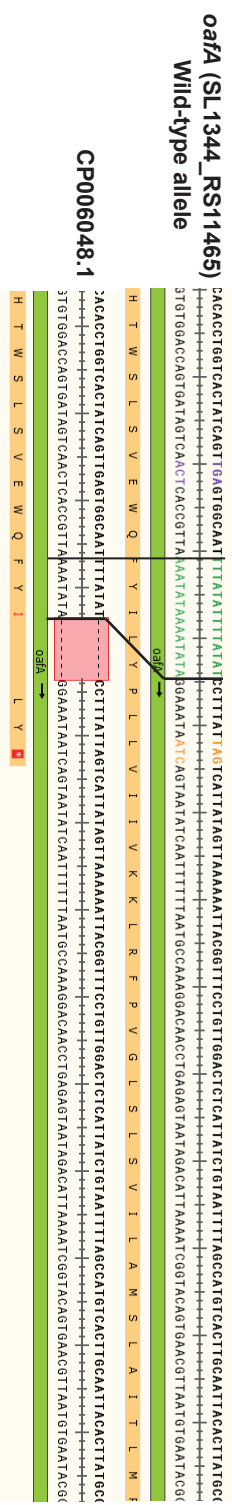

B

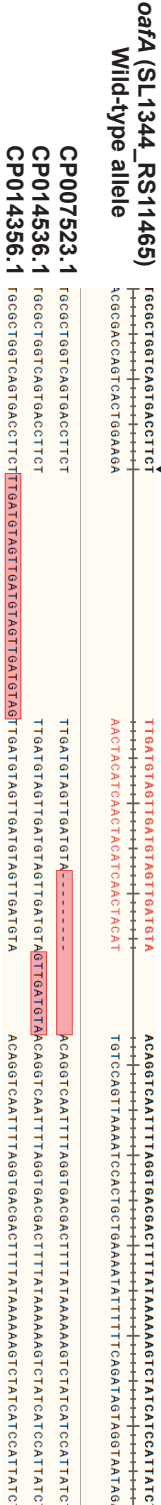

Extended Data Fig. 2: Mutations detected in the oafa gene sequence among several strains of S. Tm

1209 **Fig. ED2: Mutations detected in the *oafA* gene sequence among several strains of**  
1210 ***S.Tm*. A.** Aligned fractions of the *oafA* ORF from a natural isolate (from chicken)  
1211 presenting the same 7 bp deletion detected in mutants of *S.Tm* SL1344 emerging in  
1212 vaccinated mice. *S.Tm* SL1344 was used a reference<sup>66</sup>. **B.** Aligned *oafA* promoter  
1213 sequences from three natural isolates of human origin (stool or cerebrospinal fluid<sup>67</sup>)  
1214 showing variations in the number of 9 bp direct repeats.  
1215

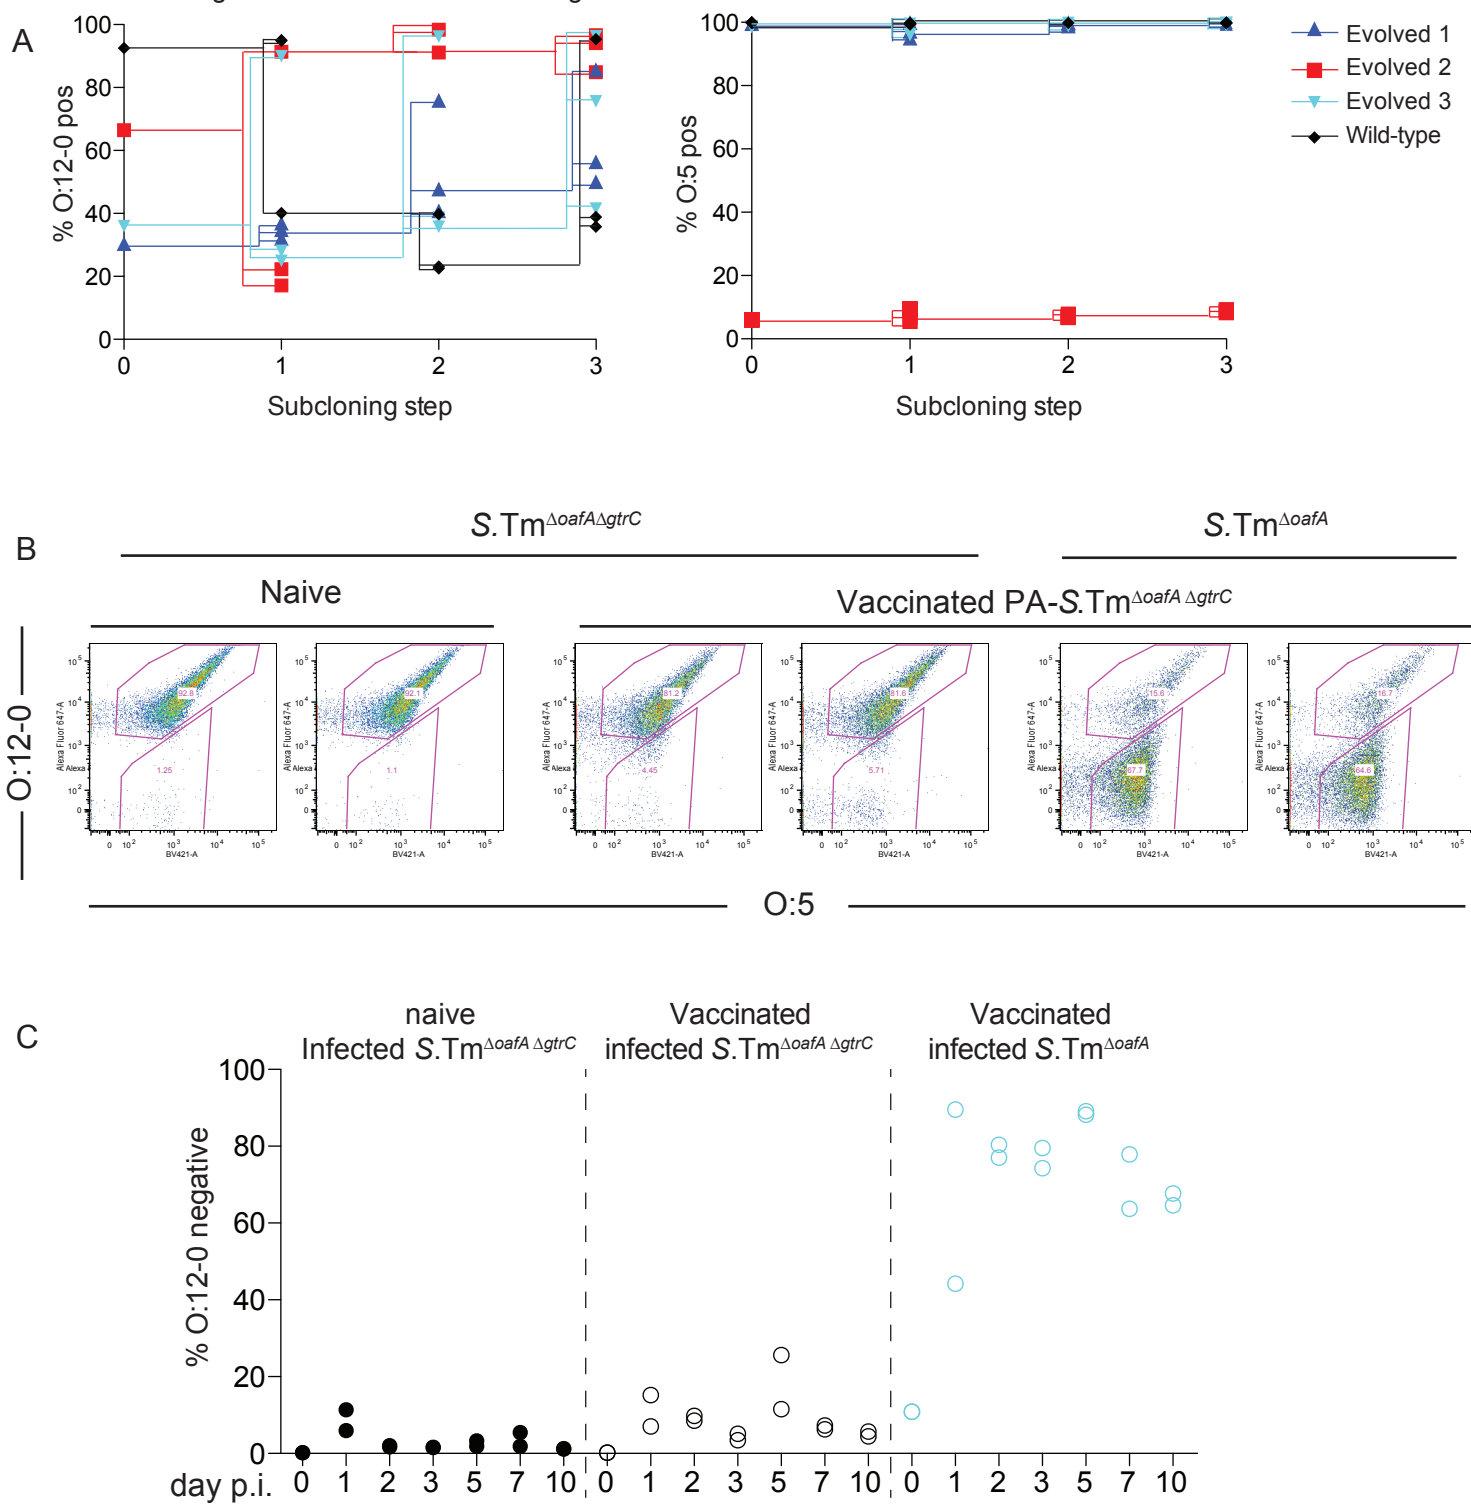

**Extended Data Fig. 3: Loss of O:12-0-staining is a reversible phenotype dependent on the *gtrABC* locus STM0557-0559**

1216

1217 **Fig. ED3: Loss of the O:12-0 epitope is a reversible phenotype. A.** Wild type and  
1218 evolved *S.Tm* clones were picked from LB plates, cultured overnight, phenotypically  
1219 characterized by O:12-0 (left panel) and O:5 staining (right panel), plated and re-picked.  
1220 This process was repeated over 3 cycles with lines showing the descendants of each  
1221 clone. **B and C.** Wild type 129S1/SvImJ mice were mock-vaccinated or were  
1222 vaccinated with PA-*S.Tm* <sup>$\Delta oafA \Delta gtrC$</sup>  as in Fig. 1. On d28, all mice were pre-treated with  
1223 streptomycin, and infected with the indicated strain. **B.** Feces recovered at day 10 post-  
1224 infection, was enriched overnight by culture in streptomycin, and stained for O:12-0  
1225 (human monoclonal STA5). Fraction O:12-0-low *S.Tm* was determined by flow  
1226 cytometry. Percentage of *S.Tm* that are O:12-0-negative was quantified over 10 days  
1227 and is plotted in panel **C**. Vaccination selects for *S.Tm* that have lost the O:12-0 epitope,  
1228 only if the *gtrC* gene is intact.

1229

1230

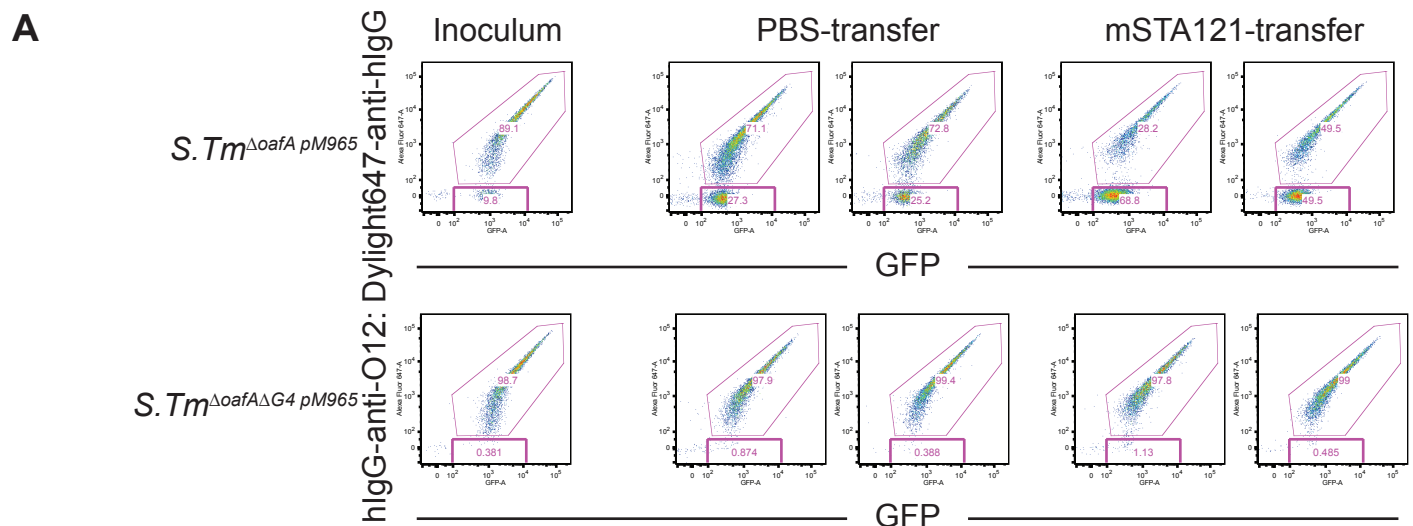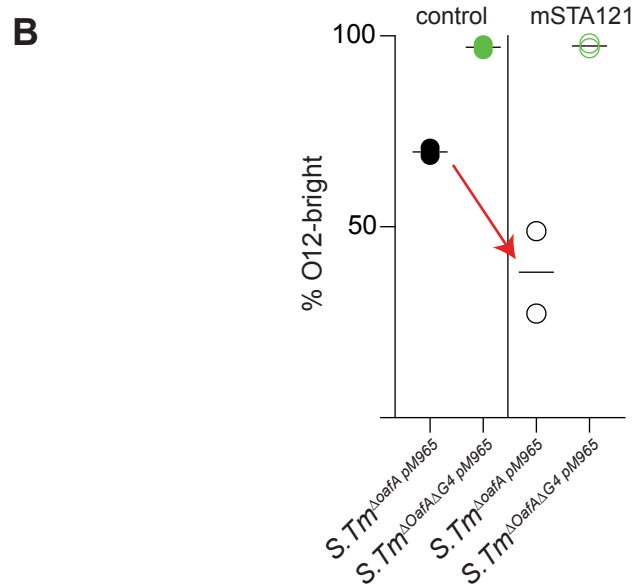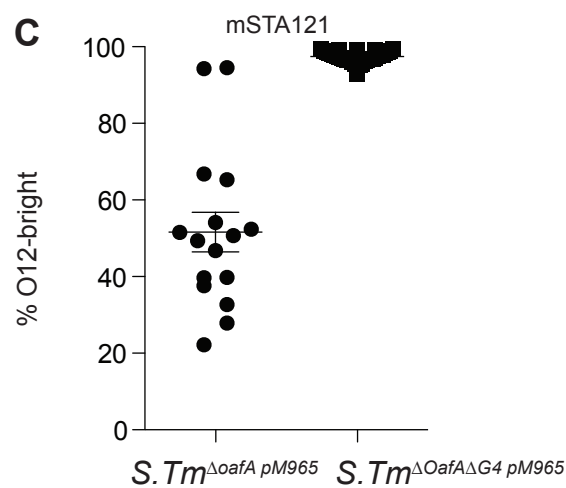

**Extended Data Fig. 4. Selective pressure for O:12 phase-variation can be exerted by adoptive transfer of a monoclonal dimeric IgA.**

1231 **Fig. ED4: Loss of the O:12-0 epitope can be driven by adoptive transfer of O:12-**  
1232 **0-specific IgA.** C57BL/6 SPF mice received oral streptomycin to deplete the  
1233 microbiota 23.5h before an intravenous injection with saline only, or with 1mg of  
1234 recombinant dimeric murine IgA specific for the O:12-0 epitope (STA121). 0.5 h later  
1235 all mice were orally inoculated with *S.Tm* <sup>$\Delta$ oafA pM965</sup> or *S.Tm* <sup>$\Delta$ oafA $\Delta$ G4 pM965</sup> (lacking 4  
1236 different glucosyl transferases, including *gtrC*) both carrying pM965 to drive  
1237 constitutive GFP production. The adoptive transfer was repeated 12h later and all  
1238 animals were euthanized at 24h post-infection. **A.** O:12-0 expression on *S.Tm* enriched  
1239 from cecum content by overnight culture on 1:1000 dilution LB with selective  
1240 antibiotics, determined by staining with the monoclonal antibody STA5. Flow  
1241 cytometry plots shown have been gated on scatter only – see Fig. S1 for example. **B.**  
1242 Quantification of the O:12-0-high fraction of *S.Tm* from A. **C.** Individual clones of  
1243 *S.Tm* of the indicated genotype were recovered from the cecal content of mice from A  
1244 that had received an adoptive transfer of mSTA121 and individual clones, cultured  
1245 overnight in LB were analysed as in A and B for fraction of O:12-0-high cells.  
1246

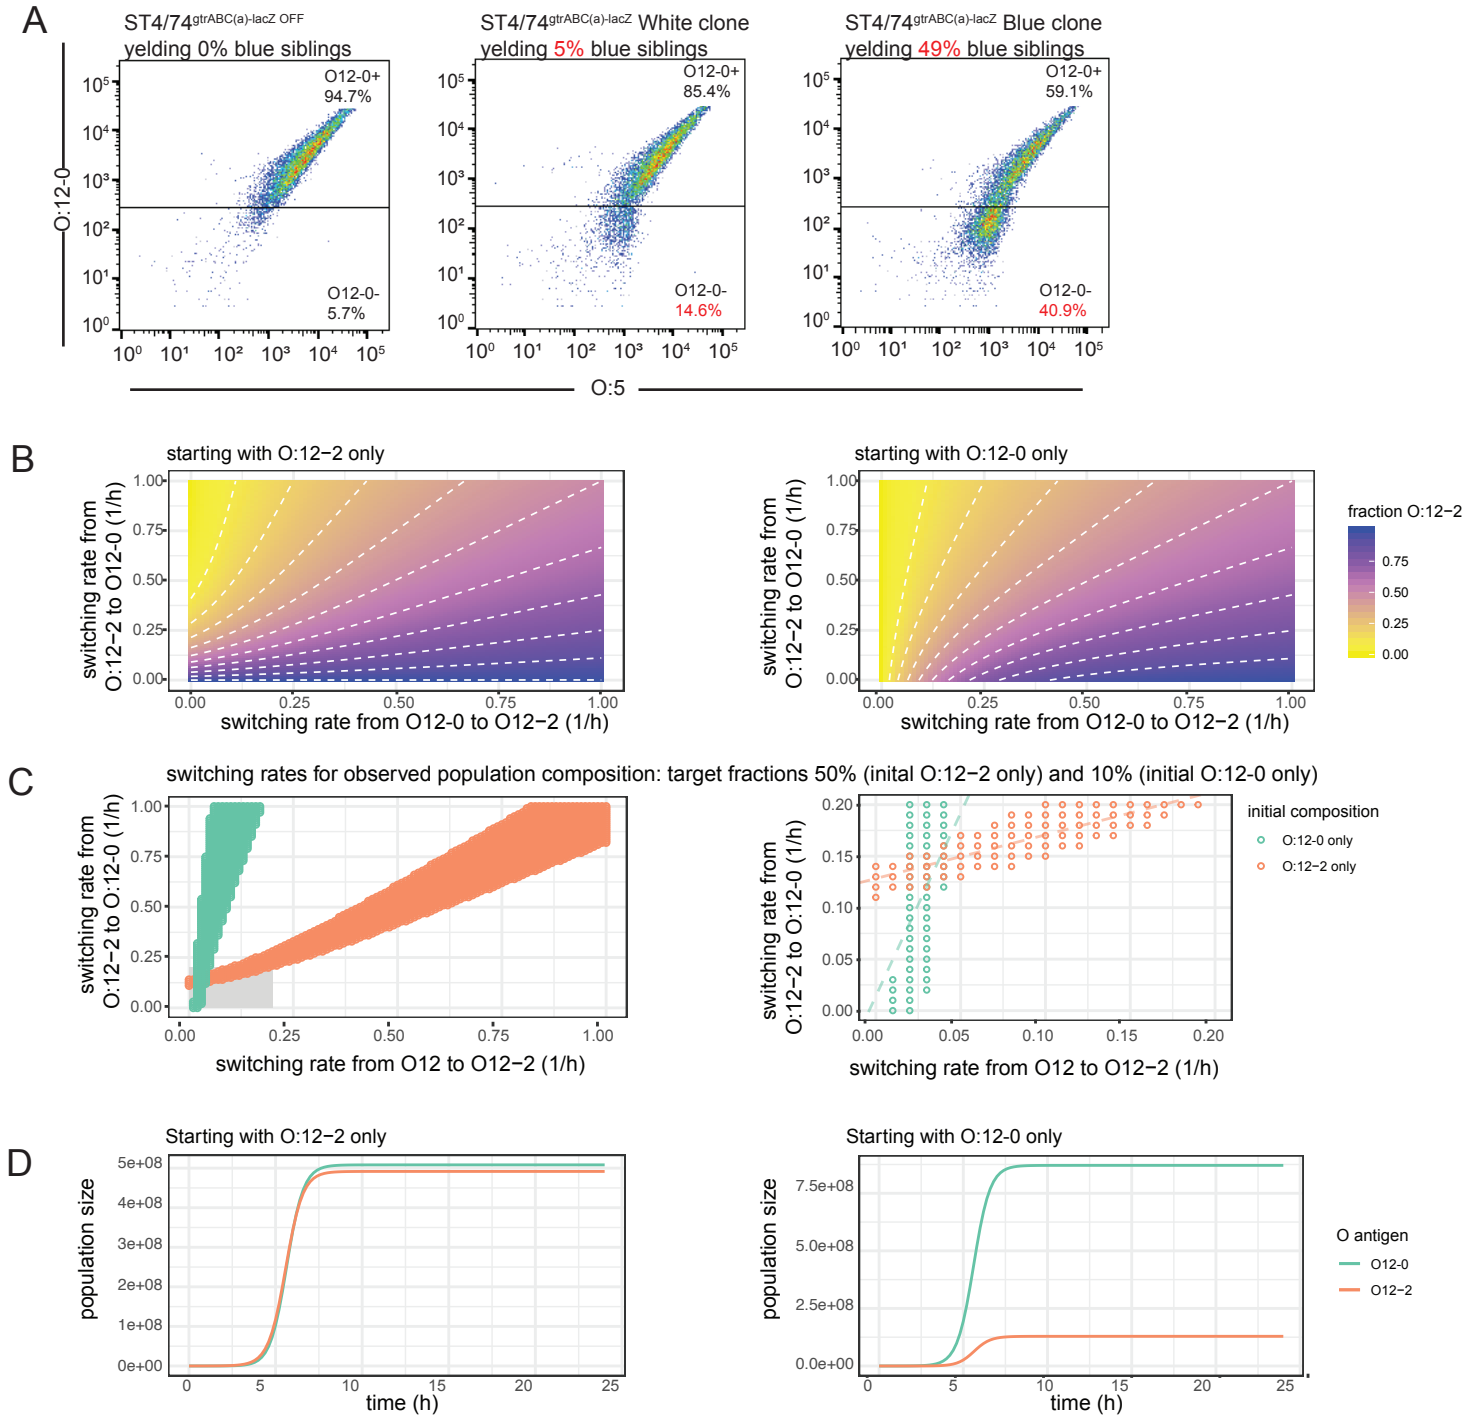

**Extended Data Fig. 5: Phase-variation and selection, without a shift in switching rate, underly recovery of O:12-2-producing clones from vaccinated mice**



1247 **Fig. ED5: Phase-variation and selection, without a shift in switching rate, underly**  
1248 **recovery of O:12-2 producing clones from vaccinated mice. A.** Comparison of  
1249 fractions of O:12-0-positive and O:12-0-negative bacteria (in fact O:12-2) determined  
1250 by flow cytometry (gating – see Fig.S1) staining with typing sera and by blue-white  
1251 colony counts using a *gtrABC-lacZ* reporter strain and overnight cultures from  
1252 individual clonal colonies. **B-D:** Results of a mathematical model simulating bacterial  
1253 growth and antigen switching (see supplementary methods). **B.** Switching rates from  
1254 O:12-0 to O:12-2 and from O:12-2 to O:12-0 were varied computationally, and the  
1255 fraction of O:12-2 was plotted after 16 h of growth. Left-hand plot depicts the results  
1256 of the deterministic model when starting with 100% O:12-2, right-hand plot depicts the  
1257 results when starting with 100% O:12-0. **C.** depicts only the switching rates that comply  
1258 with the experimentally observed antigen ratios after overnight growth (90% O:12-0  
1259 when starting with O:12-0, and 50% O:12-0 when starting with O:12-2). Right-hand  
1260 plot is a zoomed version showing values for switching rates between  $0 - 0.2 \text{ h}^{-1}$  (marked  
1261 by a grey rectangle). Dashed lines are linear regressions on the values in this range, and  
1262 their intersection marks the switching rates used for the stochastic simulation in (D). **D.**  
1263 Simulation results of bacterial population growth, when starting with only O:12-2 (left-  
1264 hand plot) or only O:12-0 (right-hand plot).  $\mu = 2.05 \text{ h}^{-1}$  was kept constant in all  
1265 simulations; switching rates were kept constant at  $s_{\rightarrow 12-0} = 0.144 \text{ h}^{-1}$  and  $s_{\rightarrow 12-2} = 0.0365 \text{ h}^{-1}$ ;  
1266 the starting populations were always individuals of the indicated phenotype; carrying  
1267 capacity was always  $K = 10^9$  cells. Time resolution for the simulations is  $0.2 \text{ h}$ .  
1268

A

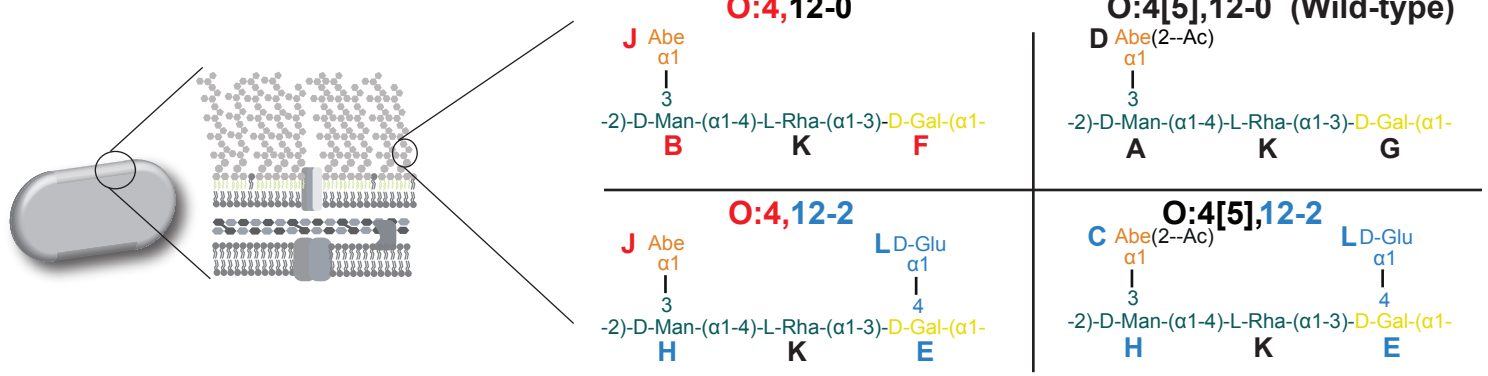

B

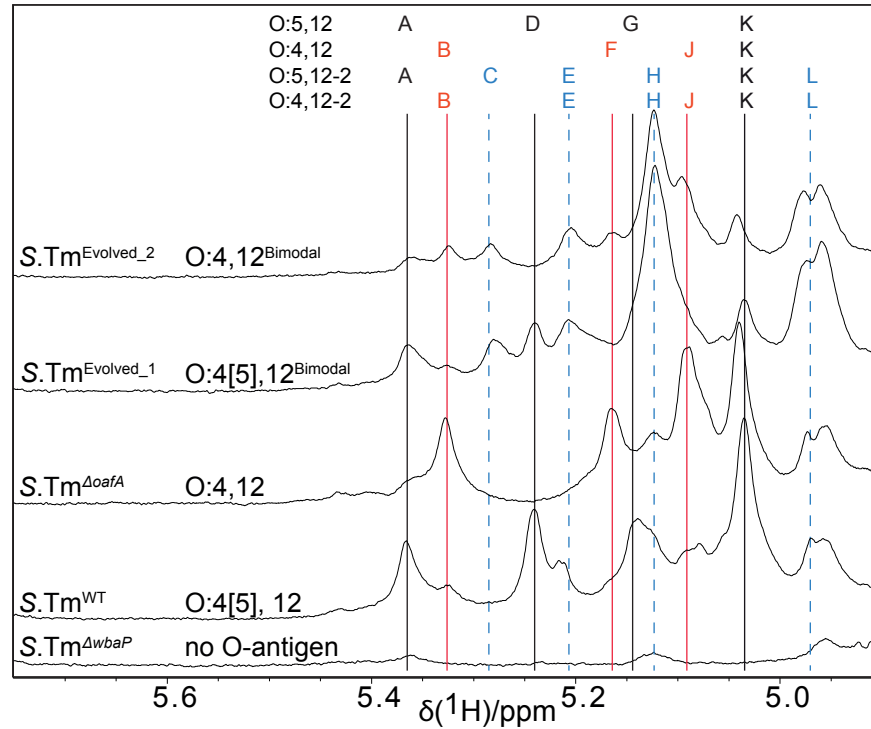

C

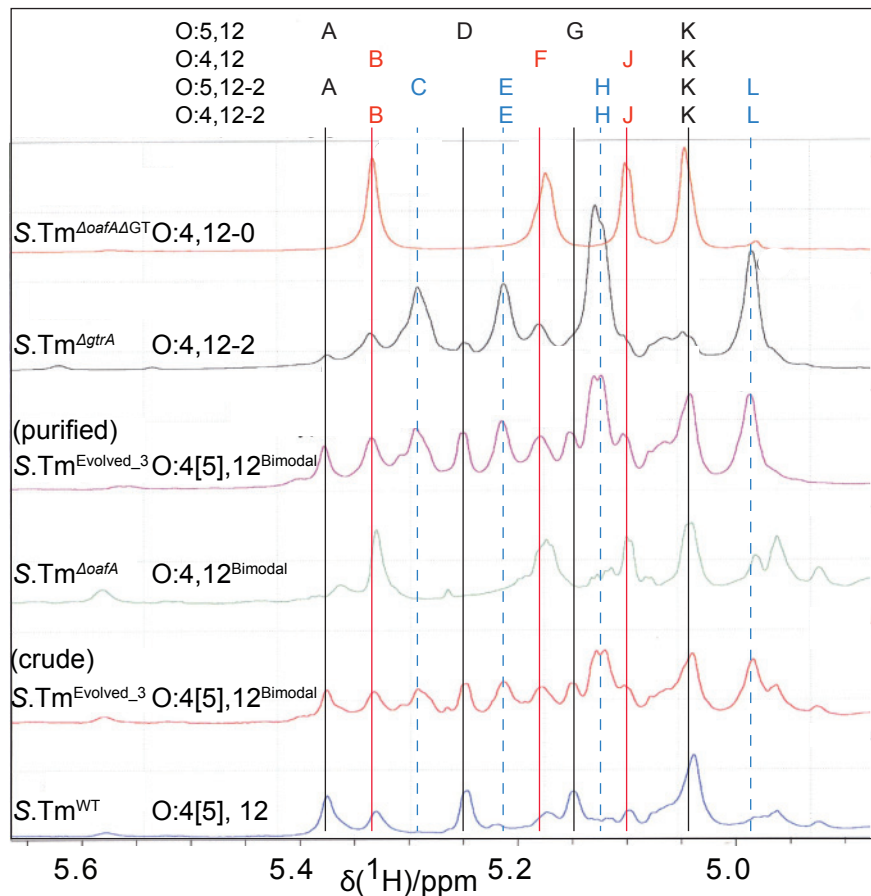

Extended Data Fig. 6: NMR of purified LPS and HR-MAS <sup>1</sup>H-NMR confirms O-antigen structures in evolved clones

1269 **Fig. ED6: NMR of purified LPS and HR-MAS <sup>1</sup>H-NMR confirms O-antigen**  
1270 **structures in evolved clones. A.** Schematic diagram of expected NMR peaks for each  
1271 molecular species **B.** HR-MAS <sup>1</sup>H-NMR spectra. Spectra show predicted peak  
1272 positions and observed spectra for C1 protons of the O-antigen sugars. **C.** <sup>1</sup>H NMR of  
1273 purified LPS from the indicated strains. Note that non-acetylated abequose can be  
1274 observed in wild type strains due to spontaneous deacetylation at low pH in late  
1275 stationary phase cultures<sup>54</sup>. A *gtrA* mutant strain is used here to over-represent the O:12-  
1276 2 O-antigen variant due to loss of regulation<sup>5</sup>.  
1277

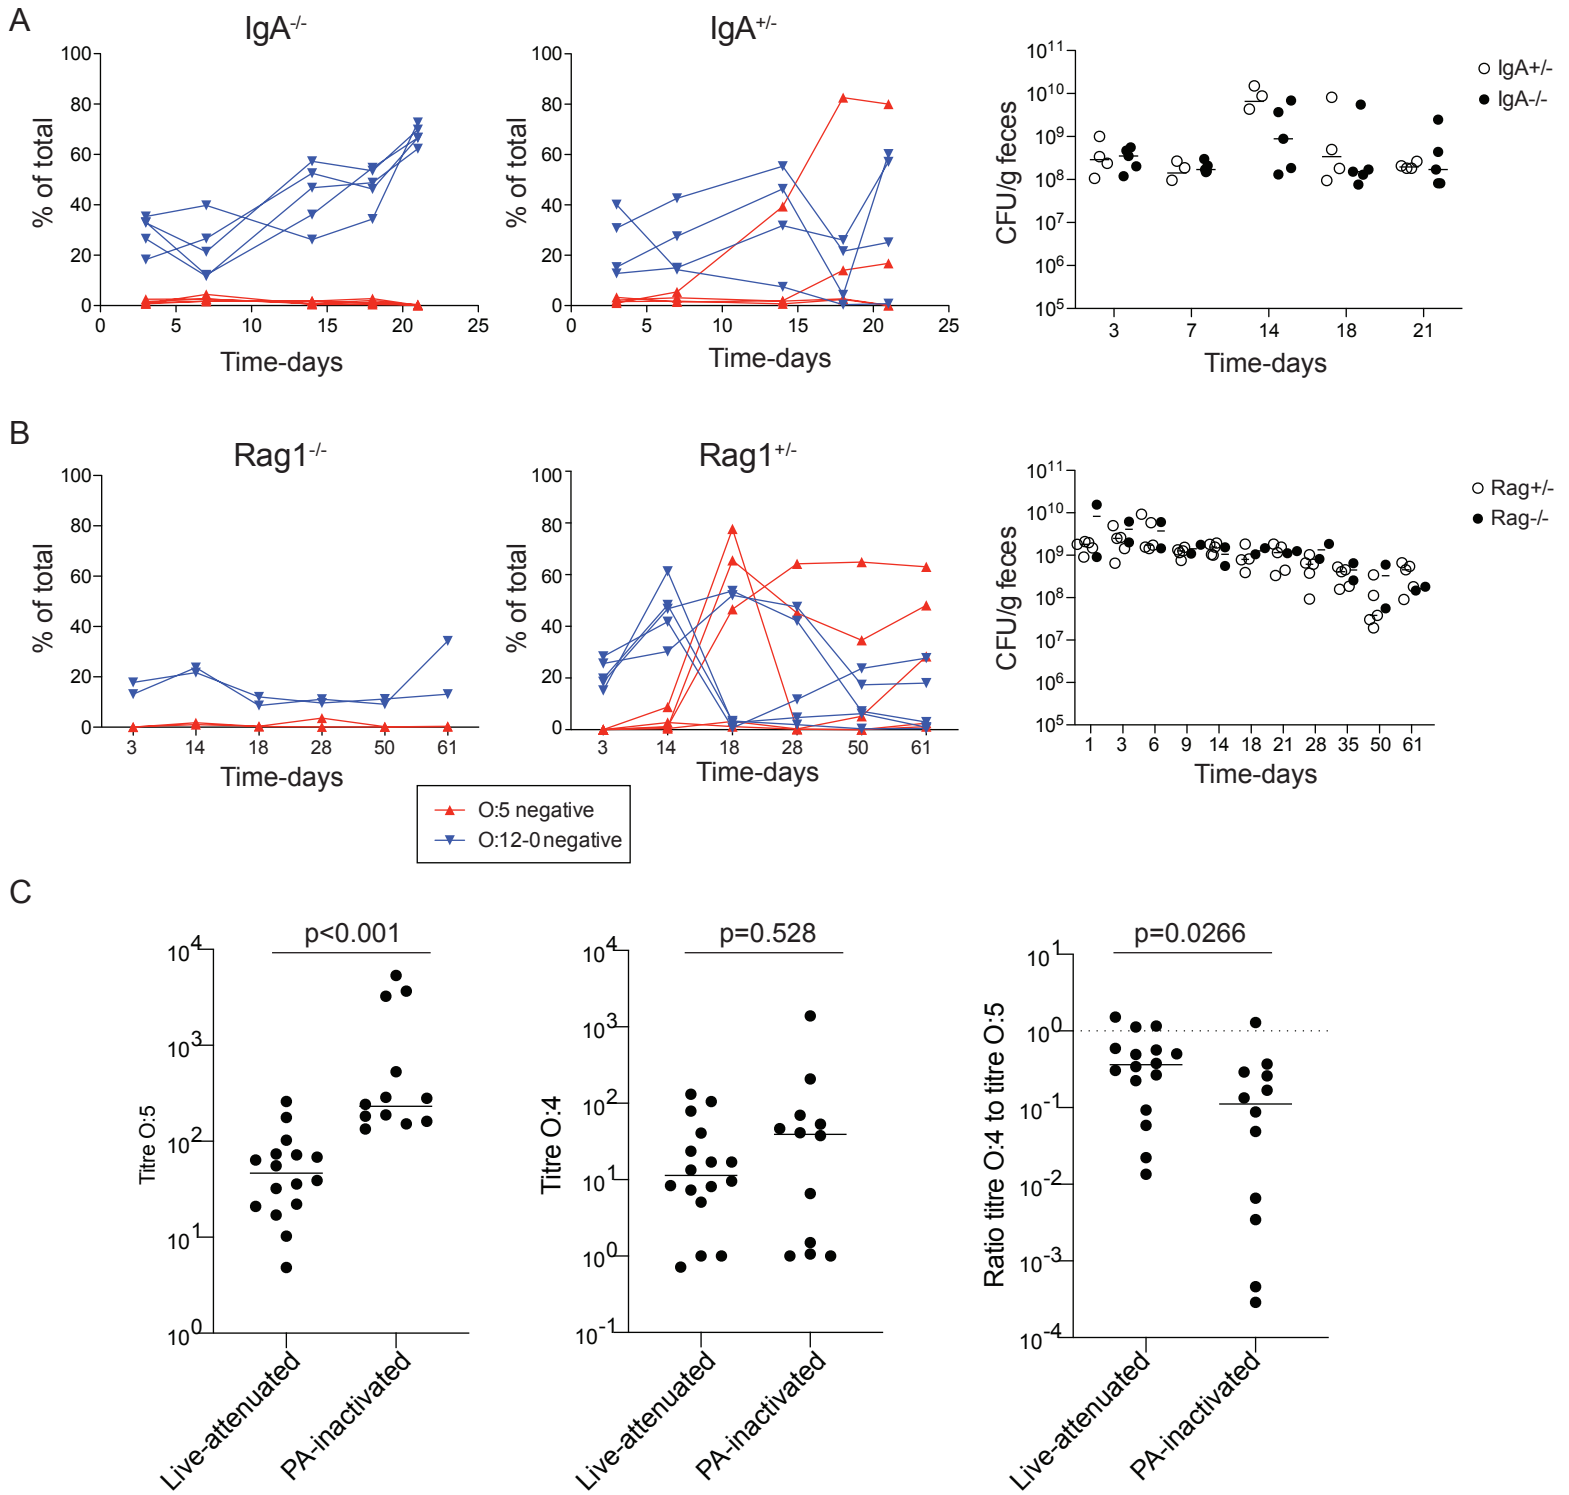

**Extended Data Fig. 7: S.Tm O-antigen variants arise during chronic S.Tm infections, dependent on a specific IgA response. After 35 days of infection, this is weaker than the IgA titres induced by inactivated oral vaccines, but less biased to recognition of O:5.**

1278 **Fig ED7: S.Tm O-antigen variants arise during chronic S.Tm infections,**  
1279 **dependent on a specific IgA response.** IgA<sup>-/-</sup> (A) and Rag1<sup>-/-</sup> (B) and heterozygote  
1280 littermate controls (C57BL/6-background) were pre-treated with streptomycin and  
1281 infected with *S.Tm*<sup>ΔsseD</sup> orally. Fecal *S.Tm* were enriched overnight by culturing a  
1282 1:2500 dilution of feces in LB plus kanamycin. These enrichment cultures were then  
1283 stained for O:5 and O:12-0 and analysed by flow cytometry (gating as in Fig. S1-4).  
1284 The fraction of the population that lost O:5 and O:12-0 antisera staining is shown over  
1285 time, as well as the total CFU/g in feces. Both immunocompetent mouse strains show  
1286 increased O:5-negative *S.Tm* in the fecal enrichments from day 14 post-infection:  
1287 approximately when we expect to see a robust secretory IgA response developing.  
1288 These changes are not observed in Rag1-deficient or IgA-deficient mice. The kinetics  
1289 of O:5-loss are likely influenced by development or broader IgA responses as the  
1290 chronic infection proceeds. *Note that lines joining the points are to permit tracking of*  
1291 *individual animals through the data set, and may not be representative of what occurs*  
1292 *between the measured time-points.* C. Titres of intestinal lavage IgA specific for O:4[5]  
1293 (*S.Tm*<sup>wt</sup>, O:4[5], 12-0) and O:4( *S.Tm*<sup>ΔoafA</sup>, O:4,12-0), presented as the dilution of  
1294 intestinal lavage required to give an IgA-staining MFI=1000 by bacterial flow  
1295 cytometry, and the ratios of these titres. Samples: d28 post-vaccination with PA-STm<sup>wt</sup>  
1296 (n=12) or d35 post-colonization with live-attenuated *S.Tm* (n=8 *S.Tm*<sup>ΔaroA</sup> + n=8  
1297 *S.Tm*<sup>ΔsseD</sup>), This revealed a weaker, but less biased IgA response in mice infected with  
1298 the live-vaccine strain, when compared to that induced by the inactivated oral vaccine.  
1299 Results of 2-tailed Mann-Whitney U tests shown.  
1300  
1301

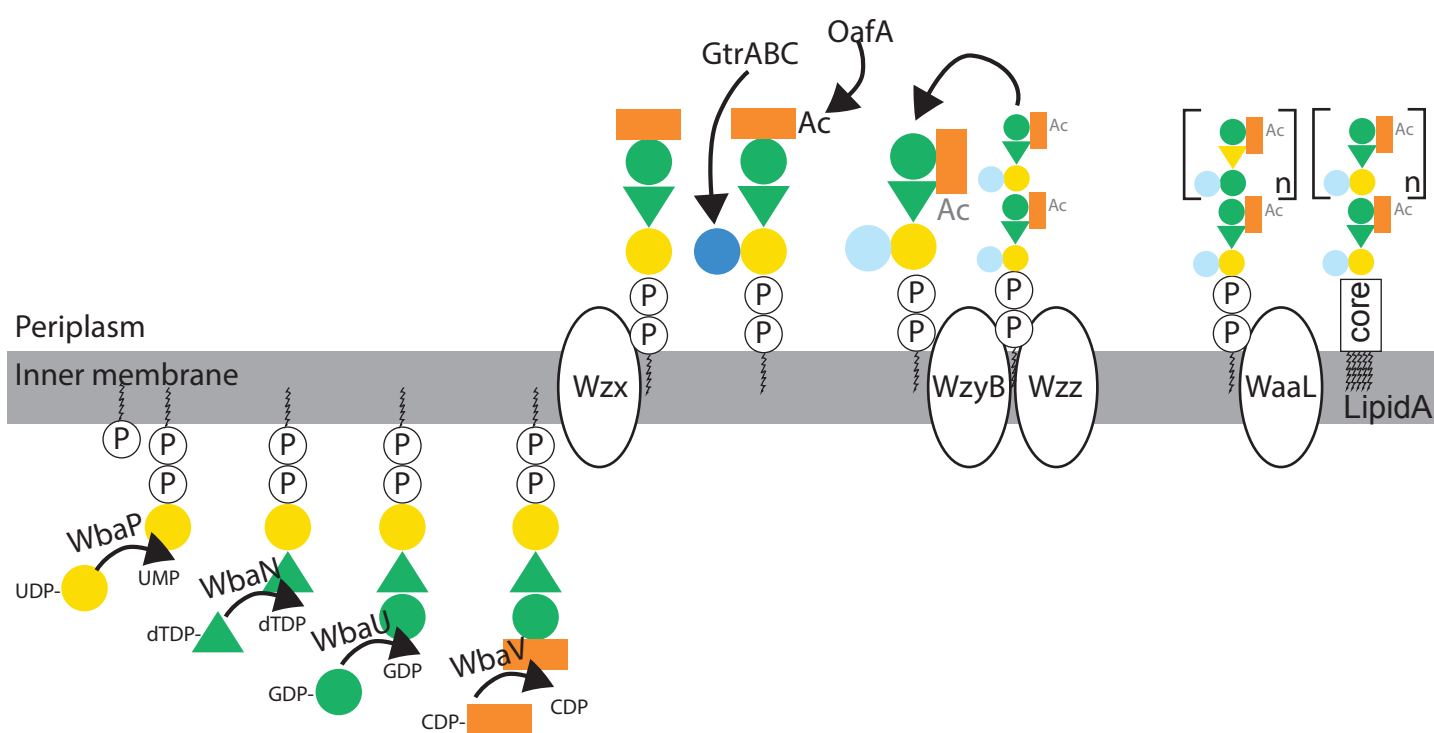

**Extended Data Fig. 8: Schematic diagram of O-antigen synthesis in S.Tm**

1302 **Fig. ED8: Schematic of *S.Tm* O-antigen synthesis (based on<sup>68</sup>)**

1303

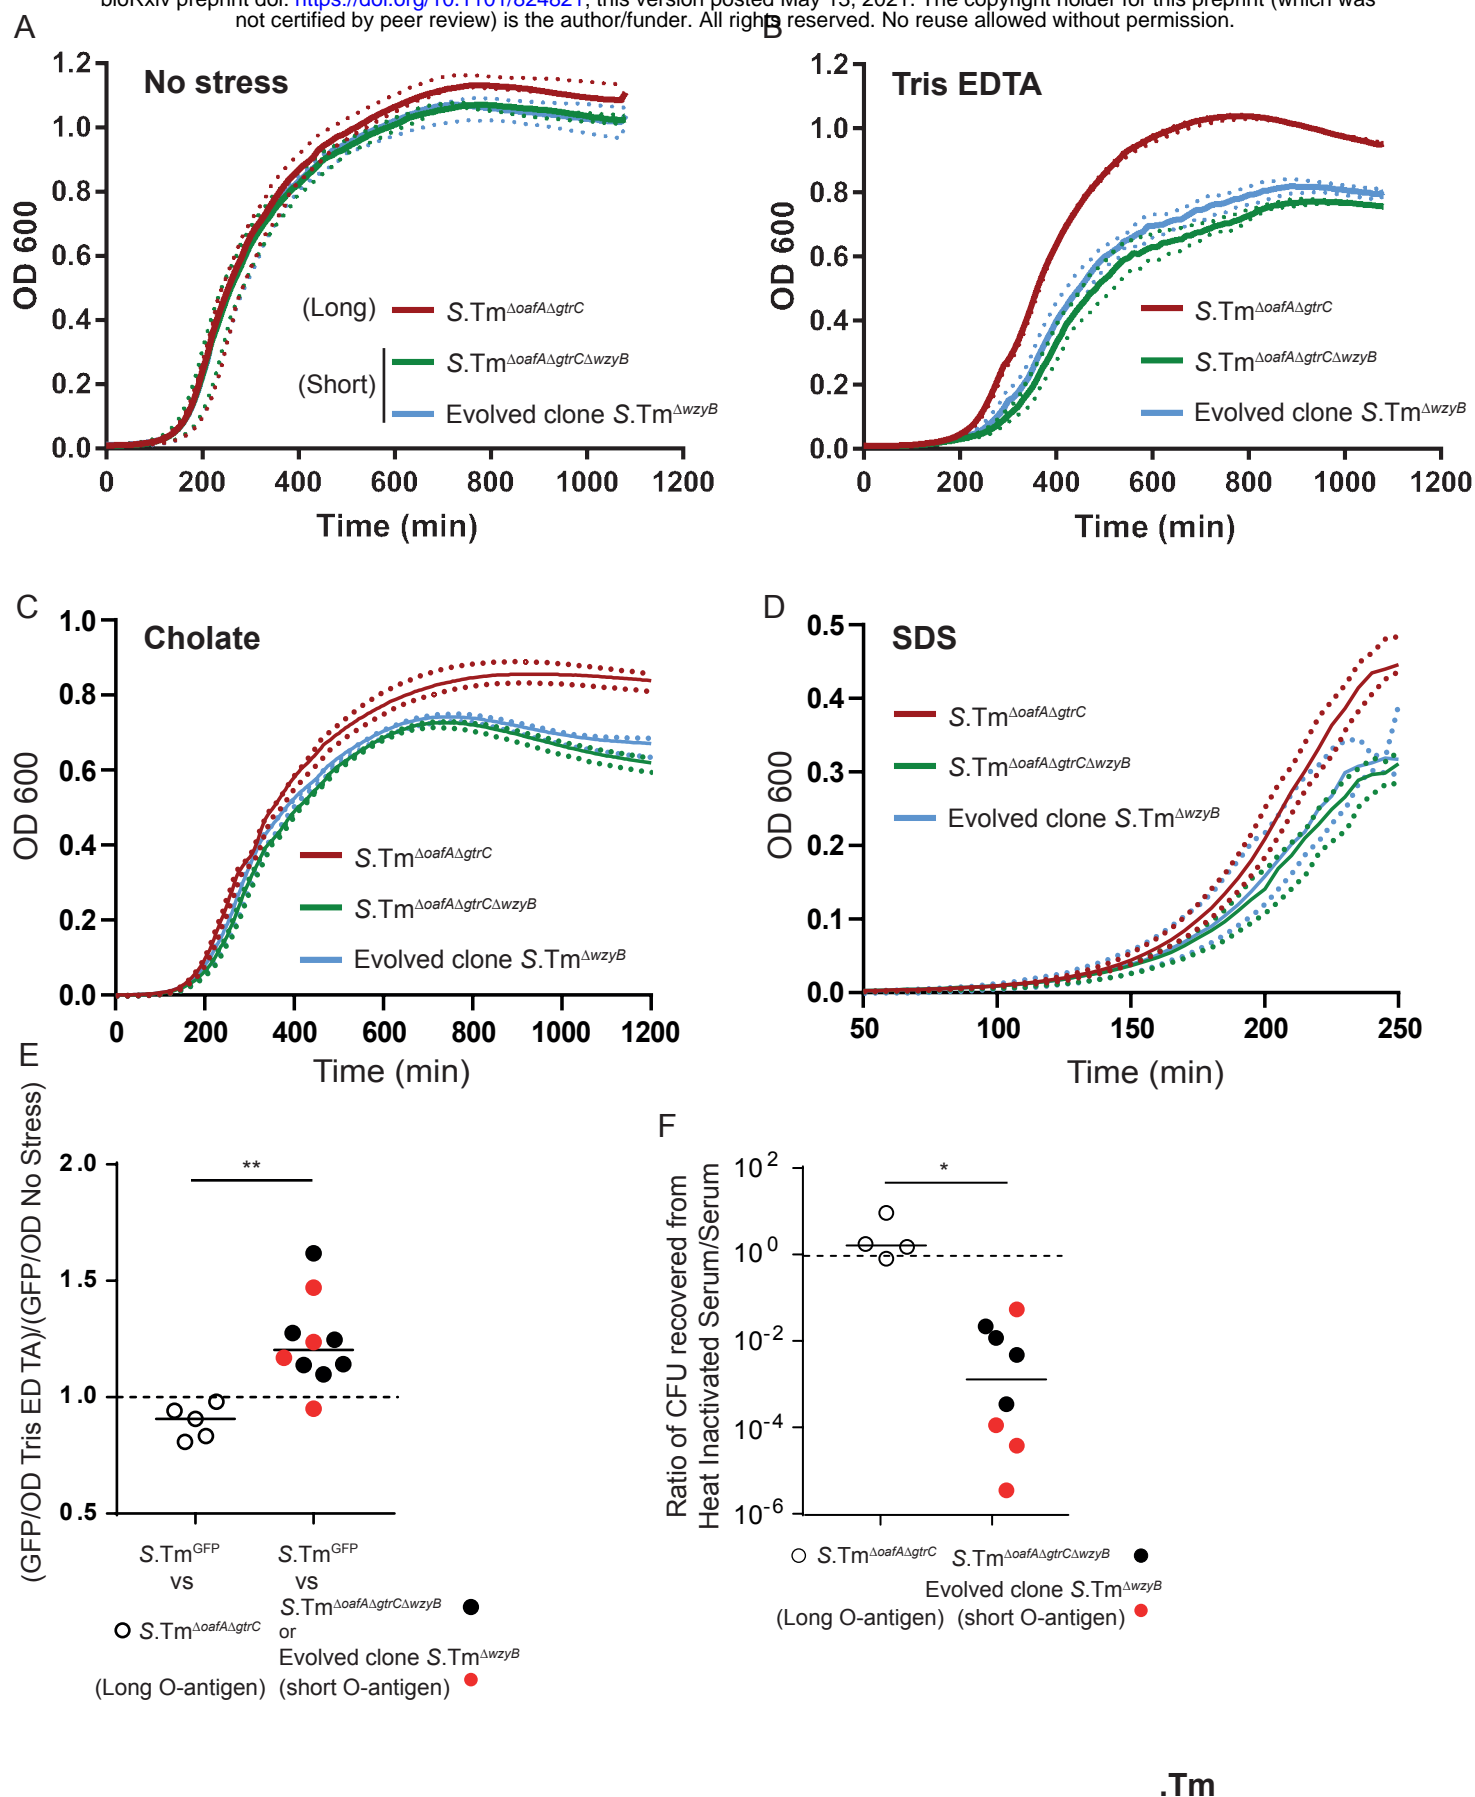

**Extended Data Fig. 9: Synthetic and natural deletions of *wzyB* reduce the fitness of *S.Tm* in presence of Tris-EDTA, cholate, SDS and human serum**



1304 **Fig. ED9: Synthetic and natural deletions of *wzyB* reduce the fitness of *S.Tm* in**  
1305 **presence of Tris-EDTA, Cholates, SDS and serum complement.** The deletion of  
1306 *wzyB* does not affect the growth of *S.Tm* or *S.Tm* <sup>$\Delta oafA \Delta gtrC$</sup>  in LB (No stress) **(A)** but  
1307 impairs growth in presence of Tris-EDTA **(B)**, 2% cholates **(C)** and 0.05% SDS **(D)**.  
1308 Dashed lines represent the range of variations between the n=4 pooled experiments.  
1309 **(E)**. Relative fitness of the long versus short O-antigen in the presence of membrane  
1310 stress as quantified by competitive growth of *S.Tm*<sup>GFP</sup> against *S.Tm* <sup>$\Delta oafA \Delta gtrC$</sup> , *S.Tm* <sup>$\Delta oafA$</sup>   
1311  <sup>$\Delta gtrC \Delta wzyB$</sup>  or an evolved *S.Tm* <sup>$\Delta wzyB$</sup> , in LB with or without Tris-EDTA. 2-tailed Mann-  
1312 Whitney U test. \*\* p=0.0013 **(F)** Loss of complement resistance in evolved and  
1313 synthetic *wzyB* mutants revealed by relative CFU recovery after treatment with heat-  
1314 inactivated and fresh human serum. Mann-Whitney U 2-tailed tests \* p=0.0167  
1315

A

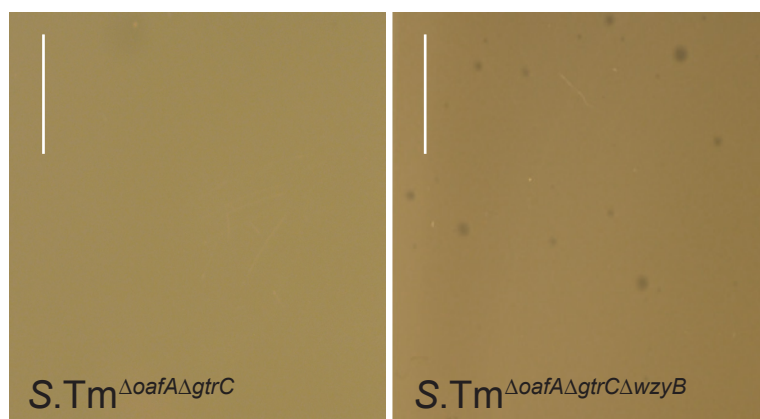

B

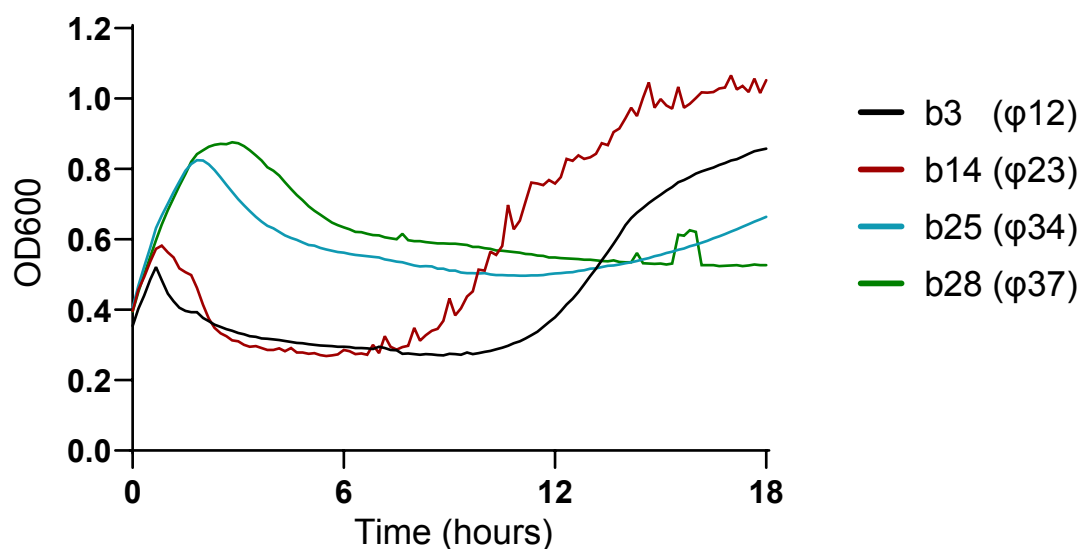

C

| Clone ID                 | Phage ID   | Position & Variation | Outcome                                                                                           |
|--------------------------|------------|----------------------|---------------------------------------------------------------------------------------------------|
| <b>b3</b><br>(MDBZ0639)  | <b>φ12</b> | 4370748 G to T       | Premature stop codon at position 401 in <i>btuB</i>                                               |
| <b>b14</b><br>(MDBZ0640) | <b>φ23</b> | 4370040 G to T       | Premature stop codon at position 165 in <i>btuB</i>                                               |
| <b>b25</b><br>(MDBZ0641) | <b>φ34</b> |                      |                                                                                                   |
| <b>b28</b><br>(MDBZ0642) | <b>φ37</b> | 4370312 deleted G    | Frame shift leading to premature stop codon at position 258 in the <i>btuB</i> open reading frame |

Extended Data Fig. 10: Analysis of bacteriophages preferentially infecting short O-antigen *S.Tm* mutants.

1316 **Fig. ED10: Analysis of bacteriophages preferentially infecting short O-antigen S.**  
1317 **Tm mutants. A.** Lysis plaques observed on lawns of *S.Tm*  $\Delta$ *gtrC*  $\Delta$ *oafA* and *S.Tm*  $\Delta$ *gtrC*  
1318  $\Delta$ *oafA*  $\Delta$ *wzyB* isogenic mutants exposed to wastewater samples. Scale = 1cm. This  
1319 phenocopies the observation with naturally arising *wzyB* mutants **B.** Growth curves of  
1320 *S.Tm*  $\Delta$ *gtrC*  $\Delta$ *oafA*  $\Delta$ *wzyB* exposed to purified bacteriophages from Fig. 4D. The re-growing  
1321 *S.Tm* clones were isolated for sequencing. The mutations identified and their effects  
1322 are listed in the table below **(C)**, confirming *btuB* as the most likely exposed outer-  
1323 membrane receptor for these phages.  
1324  
1325

1326 **List of Supplementary Materials:**

1327

1328 • Supplementary Table S1-4

1329 • Supplementary Movies 1 and 2

1330 • Supplementary Figures S1-10

1331 • Source data files for Fig.1-4, Extended Data Fig. 1-10 and

1332 Supplementary Fig. 1-10

1333 • Uncropped image files for Fig. 3G, Fig. 4D and extended data Fig. 10A

1334

1335 **Supplementary Materials**

1336 **Contents:**

1337 **Supplementary Tables and Movies**

1338 **Supplementary figures 1-10**

1339

1340 **Supplementary tables and movies**

1341 **Table S1:** Strains and plasmids used in this study<sup>4,43,45,50,69-71</sup>

1342 **Table S2:** Details of primers used in strain construction, testing and sequencing

1343 **Table S3:** Details of mutations found in resequenced O12-0 or O12 bimodal evolved  
1344 clones studied by REC-Seq as shown in Fig. 2D-G. Numbers indicate the position of  
1345 the mutation, numbers in brackets indicates the percentage of reads were the mutation  
1346 was detected.

1347 **Table S4:** Details of experiments where *S.Tm* evolution was tracked, as well as  
1348 further information on mice used and on clones analysed.

1349

1350

1351 **Supplementary Movies A and B**

1352 Visualization of O:12 phase variation using live-cell immunofluorescence. Cells  
1353 expressing GFP (green) pre-stained with fluorescently-labeled recombinant murine IgA  
1354 specific for the O:12-0 epitope (red) were loaded into a microfluidic chip for time-lapse  
1355 microscopy. Cells were fed continuously *S.Tm*-conditioned LB containing  
1356 fluorescently-labeled recombinant murine IgA STA121 specific for the O:12-0 epitope.  
1357 (A) Loss and (B) gain of antibody reactivity (red staining) was observed, indicative of  
1358 O:12 phase variation.

1359

1360

1361 **Supplementary Figures**

1362

**A**

un gated

Scatter-gate

sybr-GOLD positive B

O:4[5], 12  
S.Tm<sup>WT</sup>

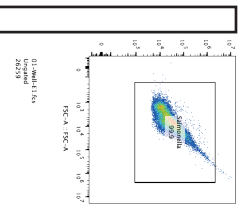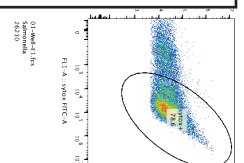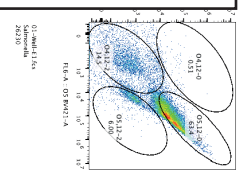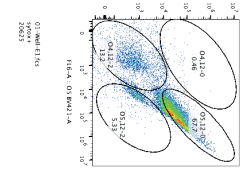

O:4[5], 12-0  
S.Tm<sup>Δgrc</sup>

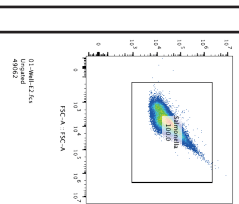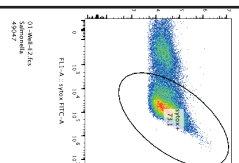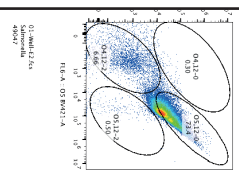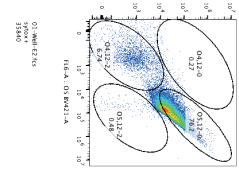

O:4[5], 12-2  
S.Tm<sup>pgtrABC</sup>

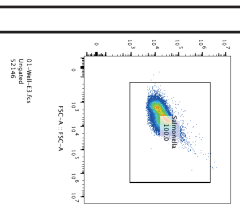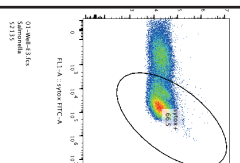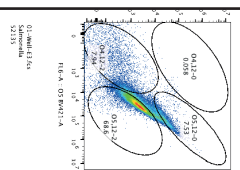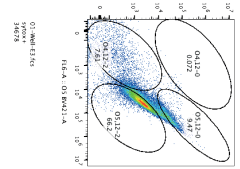

O:4, 12  
S.Tm<sup>ΔOarA</sup>

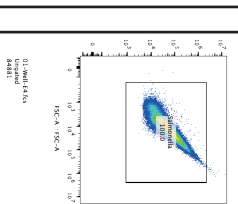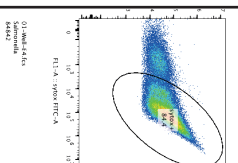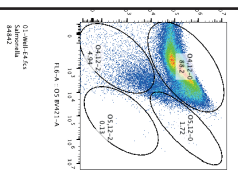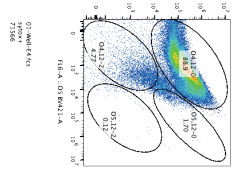

O:4, 12-2  
S.Tm<sup>ΔOarA pgtrABC</sup>

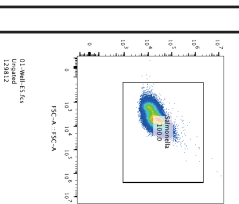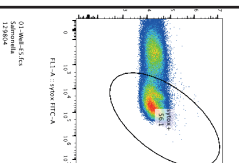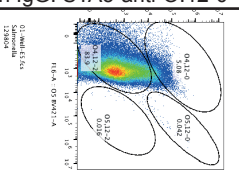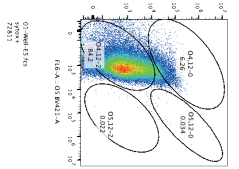

Media only

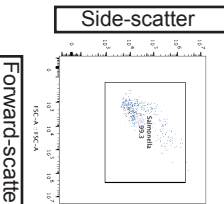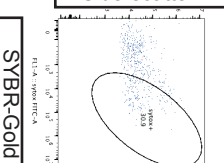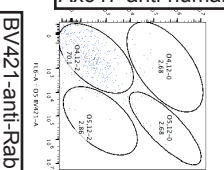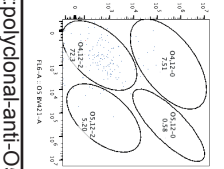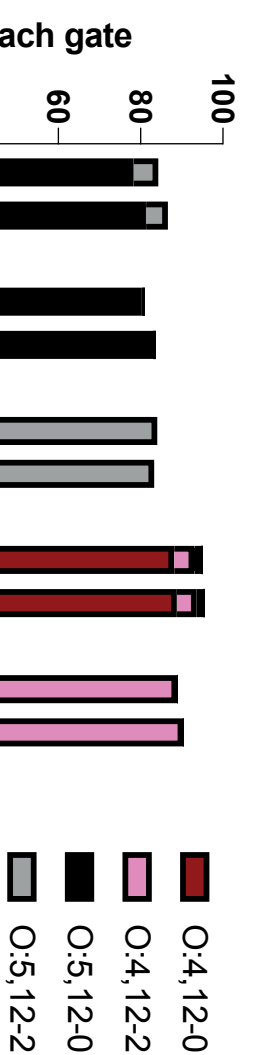

**C**

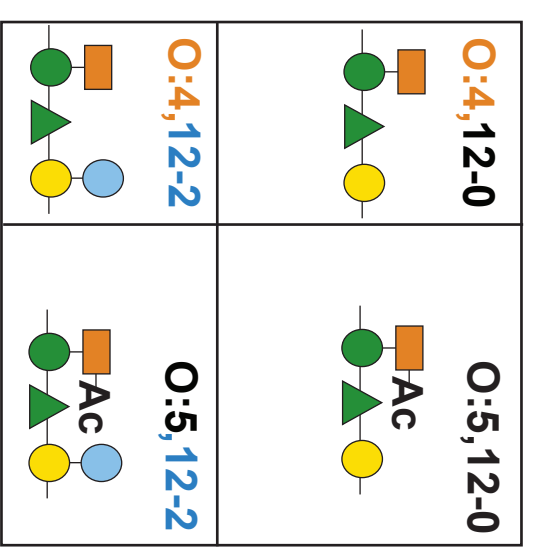

**Fig. S1: Difco Rabbit-polyclonal anti-O:5 and human monoclonal STA5 (specific for O:12-0) can be used to distinguish Salmonella with known O-antigen type, and can be distinguished from contaminants without DNA dyes.**

1363

1364 **Fig. S1: Difco Rabbit-polyclonal anti-O:5 and human monoclonal STA5 (specific**  
1365 **for O:12-0) can be used to distinguish *Salmonella* with known O-antigen type, and**  
1366 **can be distinguished from contaminants without DNA dyes.** Overnight cultures of  
1367 the indicated *S. Typhimurium* strains we made in 0.2µm-filtered LB containing  
1368 streptomycin (50µg) or Ampicillin (100µg/ml to select for plasmid-maintenance of  
1369 pgtrABC-containing strains). 1µl of an OD<sub>600</sub>=2 culture was stained in 0.2µm-filtered  
1370 PBS/0.05%Azide with 1:200 Rabbit polyclonal anti-O:5 and 6µg/ml STA5. Brilliant-  
1371 violet-421-Donkey-anti-Rabbit (Biolegend) and Alexa-647-anti-human IgG (Jackson  
1372 Immunolabs) were used at a 1:200 dilution, and SybrGold at 1:10'000 dilution. Samples  
1373 were acquired on a Beckmann Coulter Cytoflex-S. **A.** Full gating is shown for each  
1374 sample and the final analysis of O:5 versus O:12-0 staining is shown both for the entire  
1375 population gated on Forward- and Side-scatter or only on DNA-dye-positive  
1376 *Salmonella*. Note that the live bacteria do not stain uniformly with SybrGold. **B.**  
1377 Quantification of the O-antigen variant distribution within each strain, when gating on  
1378 the entire population of the SybrGold-positive fraction reveals no difference in the  
1379 analysis when DNA dyes are omitted. A sample of LB cultured overnight and treated  
1380 as the samples and acquired for the same length of time as the samples (“Media only”)  
1381 reveals very little background noise in our flow cytometry analysis. **C.** Schematic  
1382 diagram of the O-antigen structures present on bacteria in each quadrant on the scatter  
1383 plots.  
1384



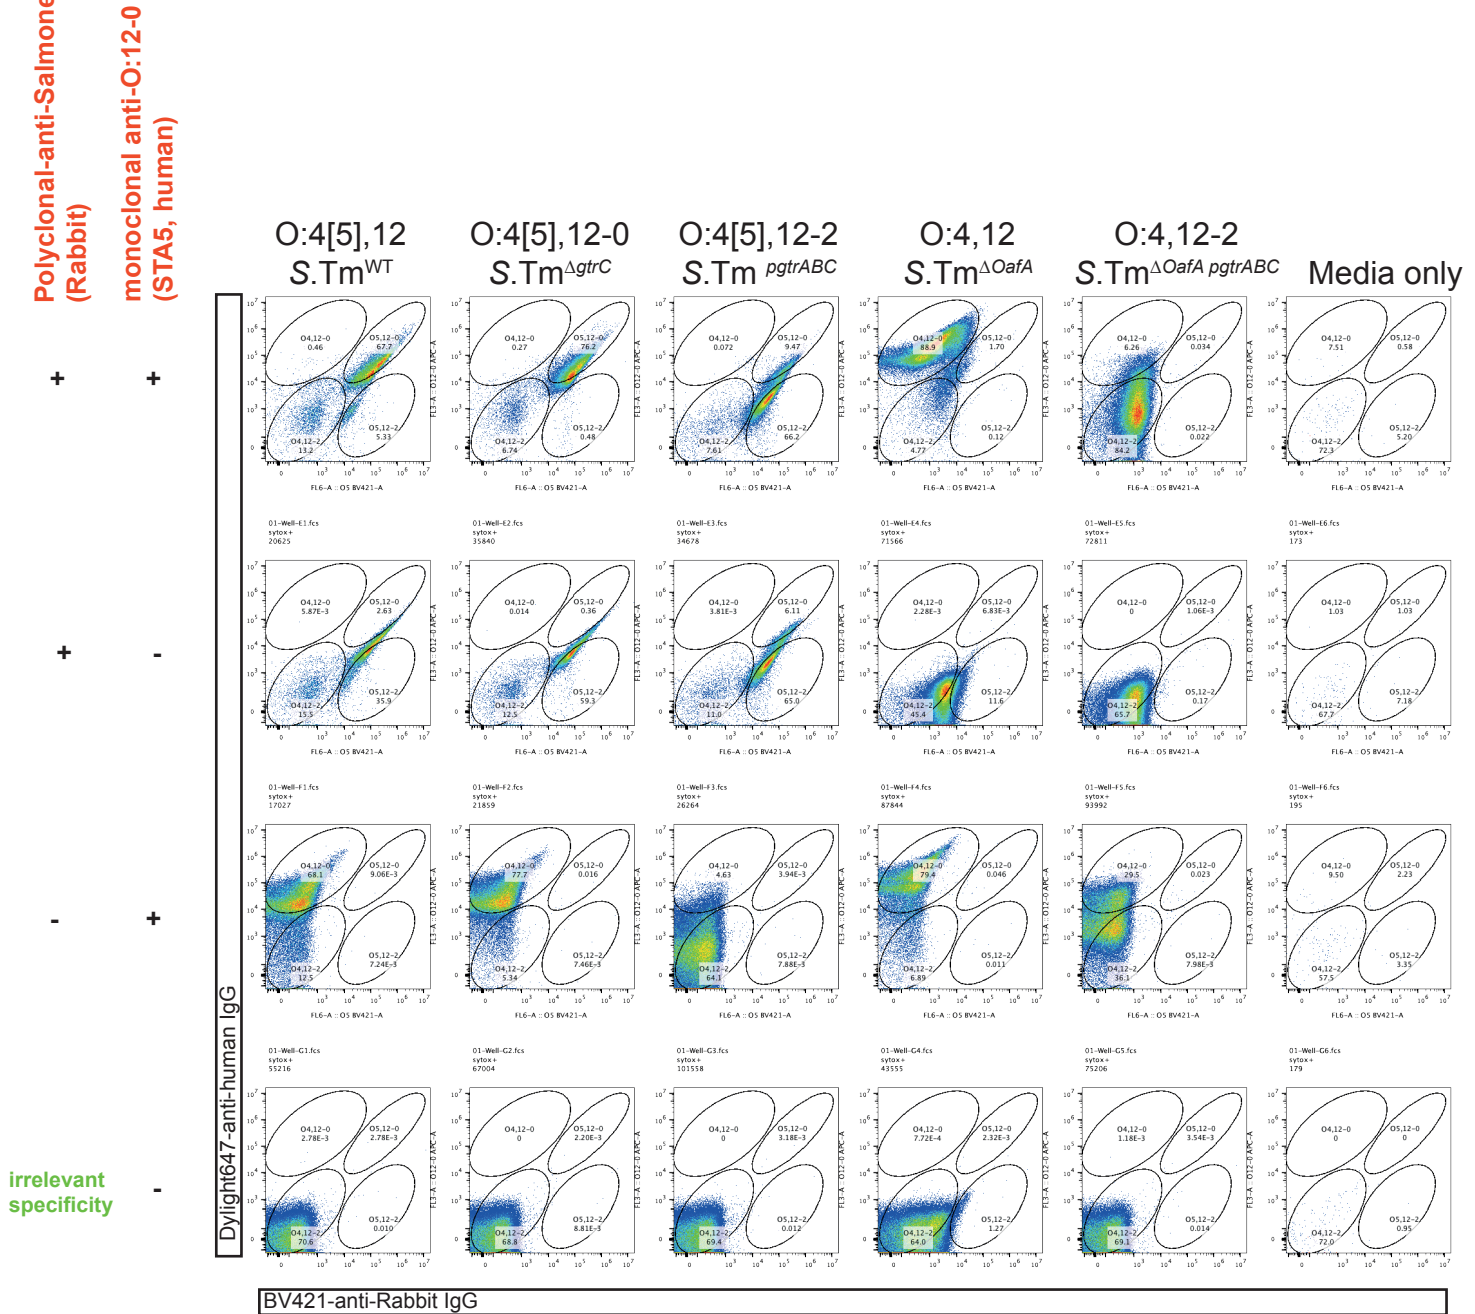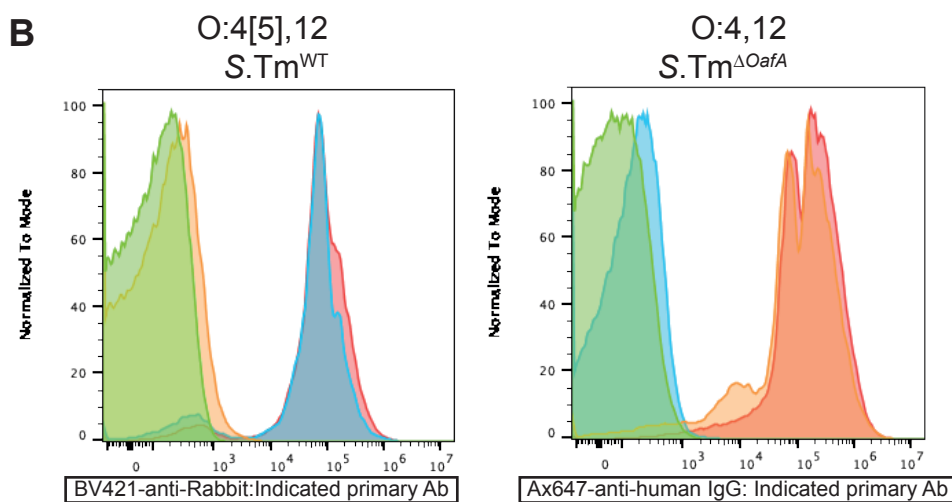

**Primary antibodies**

- Polyclonal-anti-O:5 (Rabbit), monoclonal anti-O:12-0 (STA5, human)**
- Polyclonal-anti-O:5 (Rabbit) only**
- monoclonal anti-O:12-0 (STA5, human), only**
- Polyclonal-anti-E.coli O:6 (Rabbit) only (irrelevant specificity)**

**Fig. S2: Controls for the specificity of Rabbit-polyclonal-anti-O:5 and STA5 staining.**

1385 **Fig. S2: Controls for the specificity of Rabbit-polyclonal-anti-O:5 and STA5**  
1386 **staining.** Overnight cultures of the indicated *S. Typhimurium* strains we made in  
1387 0.2µm-filtered LB containing streptomycin (50µg) or Ampicillin (100µg/ml to select  
1388 for plasmid-maintenance of p<sub>gtrABC</sub>-containing strains). 1µl of an OD<sub>600</sub>=2 culture  
1389 was stained in 0.2µm-filtered PBS/0.05%Azide with the indicated combinations of  
1390 1:200 Rabbit polyclonal anti-O:5, 1:200 Rabbit polyclonal anti-E.coli O:6, 6µg/ml  
1391 STA5. Brilliant-violet-421-Donkey-anti-Rabbit (Biolegend) and Alexa-647-anti-  
1392 human IgG (Jackson Immunolabs) were used at a 1:200 dilution as secondary reagents  
1393 in all stainings. Samples were acquired on a Beckmann Coulter Cytoflex-S. **A.** Samples  
1394 were gated on Forward- and Side-scatter as in Fig. S1. This reveals good specificity of  
1395 the antibodies with the exception of low level cross-reactivity of the anti-human IgG  
1396 for the rabbit polyclonal antibody. However, the background generated by this staining  
1397 is much lower than the real positive signal and does not alter interpretation of our data.  
1398 **B.** Representative histogram overlays of the above stainings indicating antibody  
1399 specificity.  
1400

**A**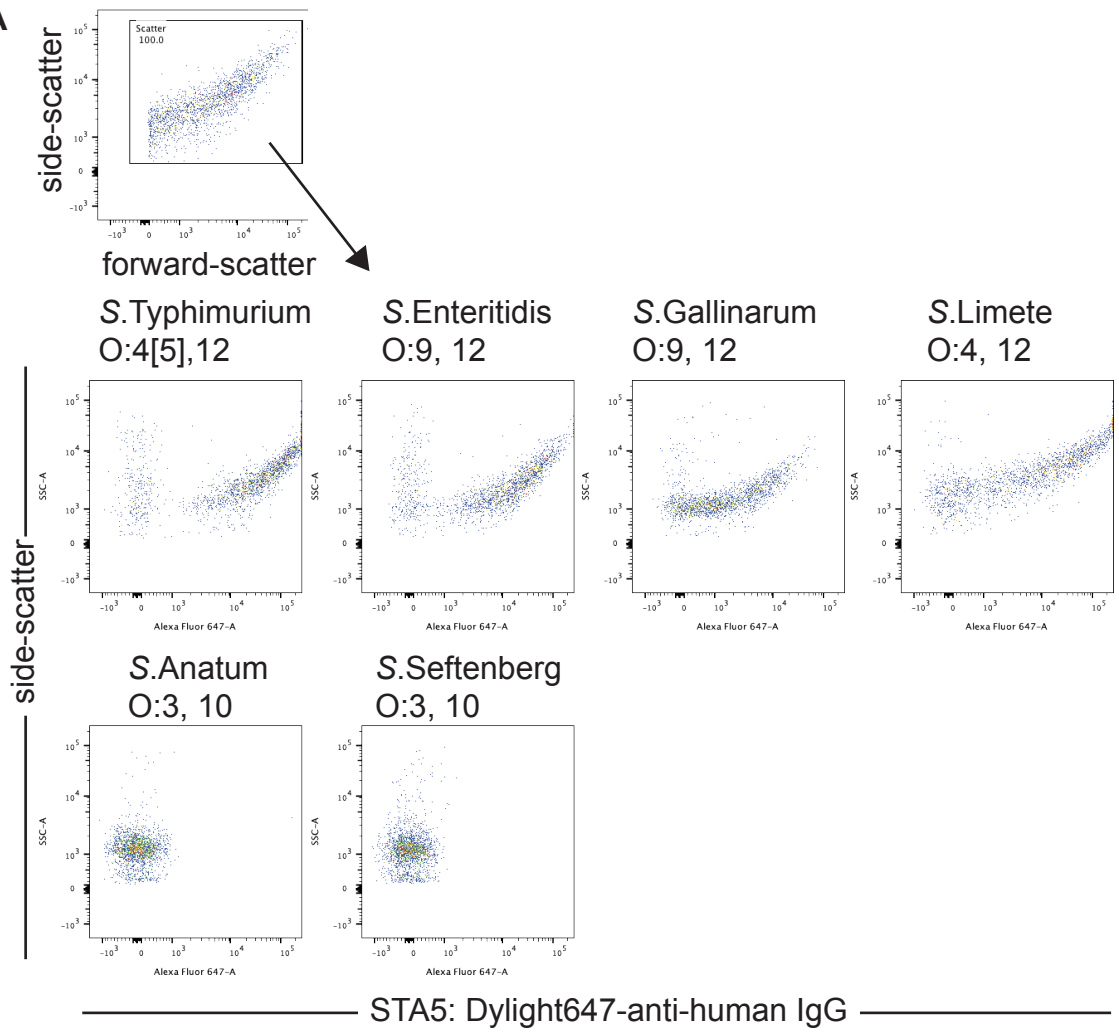

**Fig. S3: Monoclonal antibody STA5 recognises many O:12-containing *S. enterica* O-antigens**

1401 **Fig. S3: Characterization of the specificity of STA5 using diverse *Salmonella***  
1402 ***enterica* serovars and recombinant *S.Tm* strains. A.** Recombinant monoclonal STA5  
1403 human IgG1 was used to surface stain overnight cultures of the indicated *Salmonella*  
1404 *enterica* serovars. Bacterial surface binding was detected with a Dylight-647-anti  
1405 human IgG secondary antibody and analysed by flow cytometry. STA5 binds to all  
1406 serovars that include the O:12 epitope. Top panel shows the pre-gating strategy, which  
1407 served only to remove events landing on the axes in forward-scatted and side-scatter  
1408 measurements  
1409

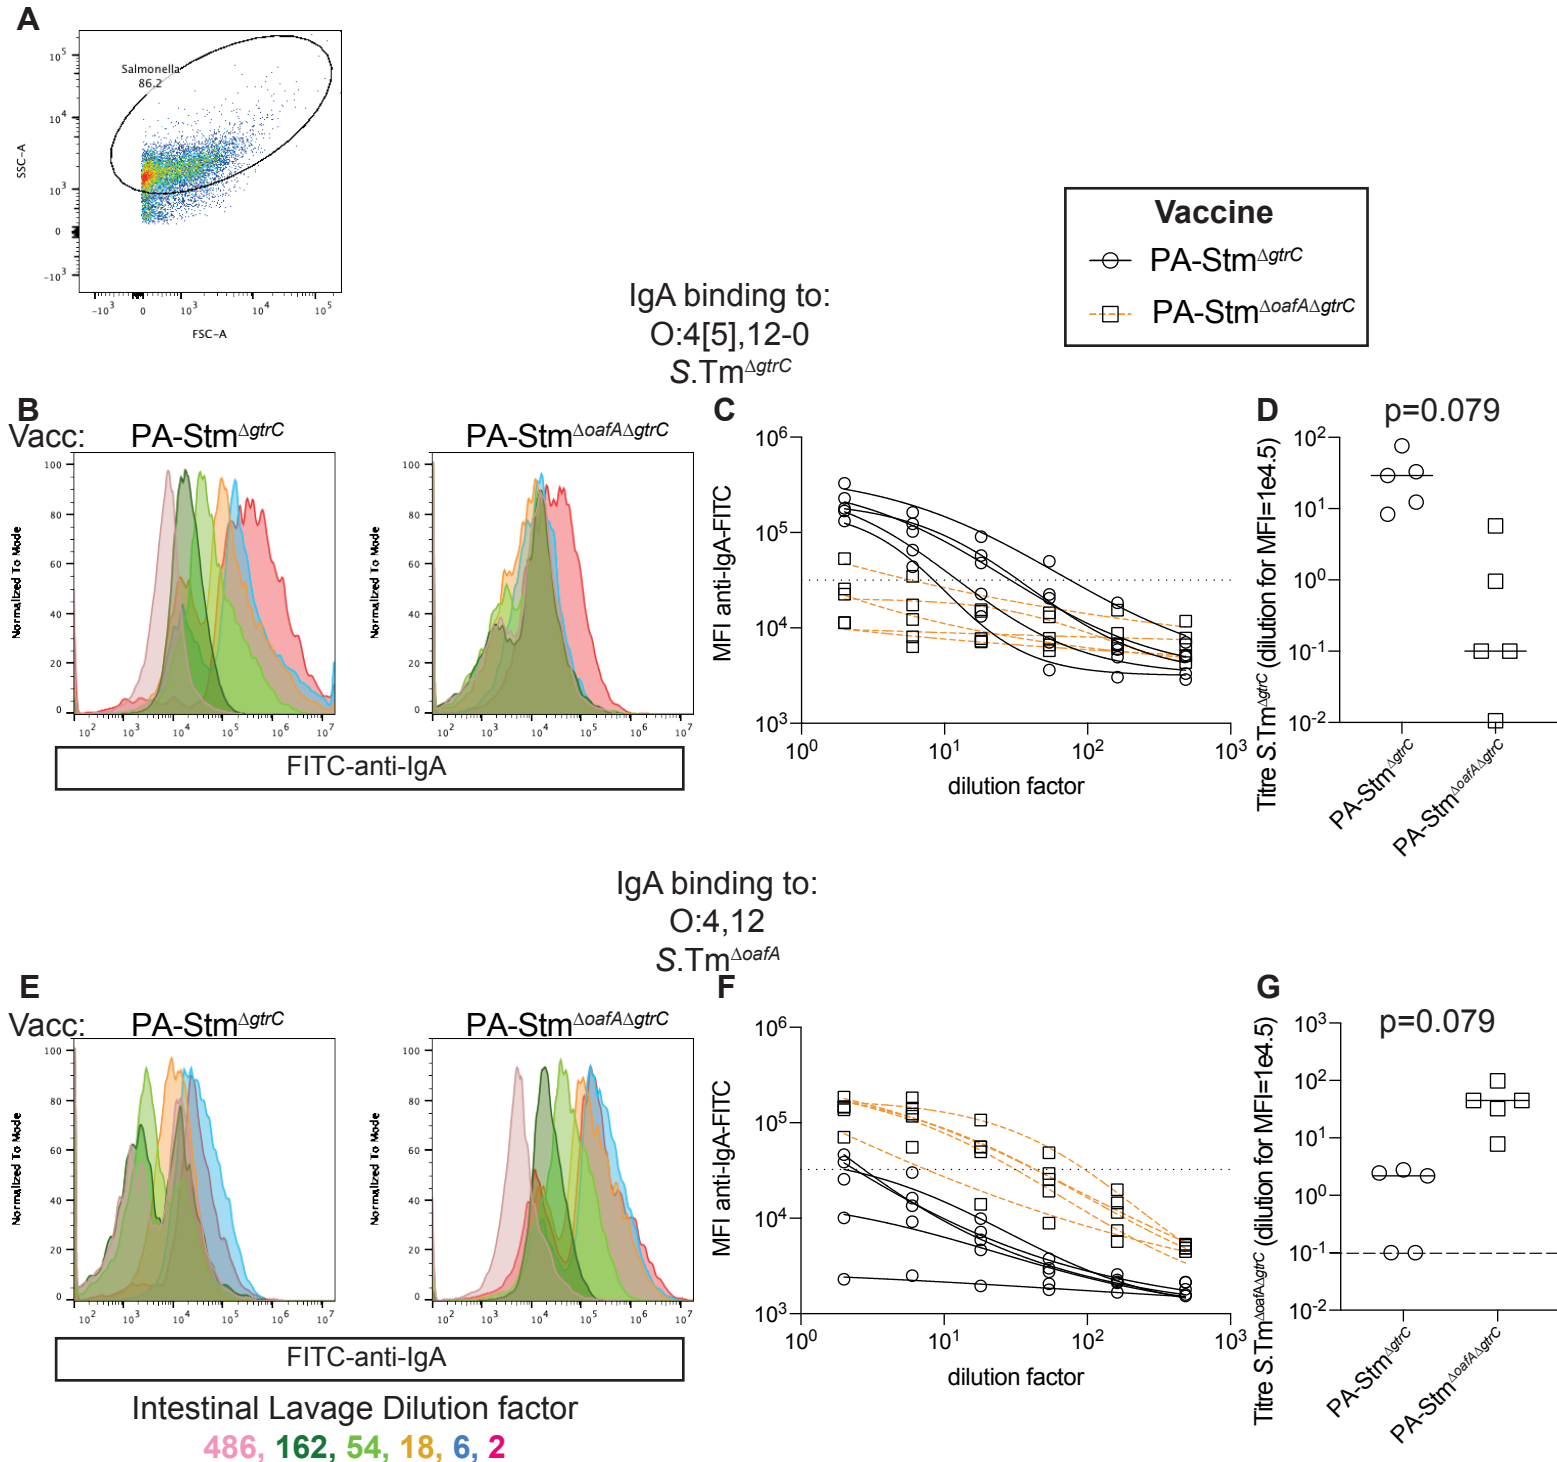

**Fig. S4: Bacterial flow cytometry titring of intestinal IgA, corresponding to Fig, 1F and G**

1410

1411 **Fig. S4: Raw data for intestinal IgA titre calculations shown in Fig. 1F and G**  
1412 **(binding to *S.Tm* <sup>$\Delta$ gtrC</sup> (O:4[5],12-0) and *S.Tm* <sup>$\Delta$ oafA  $\Delta$ gtrC</sup> (O:4,12-0)).** **A.** Forward- and  
1413 side-scatter plot showing gating based on scatter, used for all analysis. **B.**  
1414 Representative overlaid histograms of *S.Tm* <sup>$\Delta$ gtrC</sup> stained with intestinal lavage from a  
1415 C57BL/6 mouse orally vaccinated once per week for 4 weeks with PA-STm <sup>$\Delta$ gtrC</sup> (left)  
1416 and PA-STm <sup>$\Delta$ oafA  $\Delta$ gtrC</sup> (right). BV421-conjugated anti-mouse IgA was used as a  
1417 secondary antibody to reveal IgA coating of *S.Tm*. Colours represent different dilutions  
1418 of the intestinal lavages ranging from a dilution factor of 2 (red) to 486 (pink). **C.**  
1419 Intestinal lavage dilution factor plotted against the median fluorescence intensity of IgA  
1420 staining (circles: PA-STm <sup>$\Delta$ gtrC</sup>-vaccinated, squares: PA-STm <sup>$\Delta$ gtrC</sup>-vaccinated) for all  
1421 mice shown in Fig. 1F and G. Lines (black = PA-STm <sup>$\Delta$ gtrC</sup>-vaccinated, orange = PA-  
1422 STm <sup>$\Delta$ oafA $\Delta$ gtrC</sup> -vaccinated) indicate 4-parameter logisitic curves fitted to these values  
1423 using least-squares non-linear regression. **D.** Titres calculated from the fitted curves as  
1424 the intestinal lavage dilution giving a median fluorescence intensity of staining = 1000  
1425 for each curve shown in C. Line indicates median value. P value of 2-tailed Mann-  
1426 Whitney U test. **E.** Representative overlaid histograms of *S.Tm* <sup>$\Delta$ oafA $\Delta$ gtrC</sup> stained with  
1427 intestinal lavage from a mouse orally vaccinated once per week for 4 weeks with PA-  
1428 STm <sup>$\Delta$ gtrC</sup> (left) and PA-STm <sup>$\Delta$ oafA  $\Delta$ gtrC</sup> (right). BV421-conjugated anti-mouse IgA was  
1429 used as a secondary antibody to reveal IgA coating of *S.Tm*. Colours represent different  
1430 dilutions of the intestinal lavages ranging from a dilution factor of 2 (red) to 486 (pink).  
1431 **F.** Intestinal lavage dilution factor plotted against the median fluorescence intensity of  
1432 IgA staining (circles: PA-STm <sup>$\Delta$ gtrC</sup>-vaccinated, squares: PA-STm <sup>$\Delta$ gtrC</sup>-vaccinated) for  
1433 all mice shown in Fig. 1F and G. Lines (black = PA-STm <sup>$\Delta$ gtrC</sup>-vaccinated, orange = PA-  
1434 STm <sup>$\Delta$ oafA $\Delta$ gtrC</sup> -vaccinated) indicate 4-parameter logisitic curves fitted to these values  
1435 using least-squares non-linear regression. **G.** Titres calculated from the fitted curves as  
1436 the intestinal lavage dilution giving a median fluorescence intensity of staining = 1000  
1437 for each curve shown in F. Line indicates median value. P value of 2-tailed Mann-  
1438 Whitney U test. All vaccinated mice were C57BL/6 and had an SPF microbiota. Note  
1439 the significantly higher titres of IgA specific for the vaccination strain than the mis-  
1440 matched strain.

1441

1442

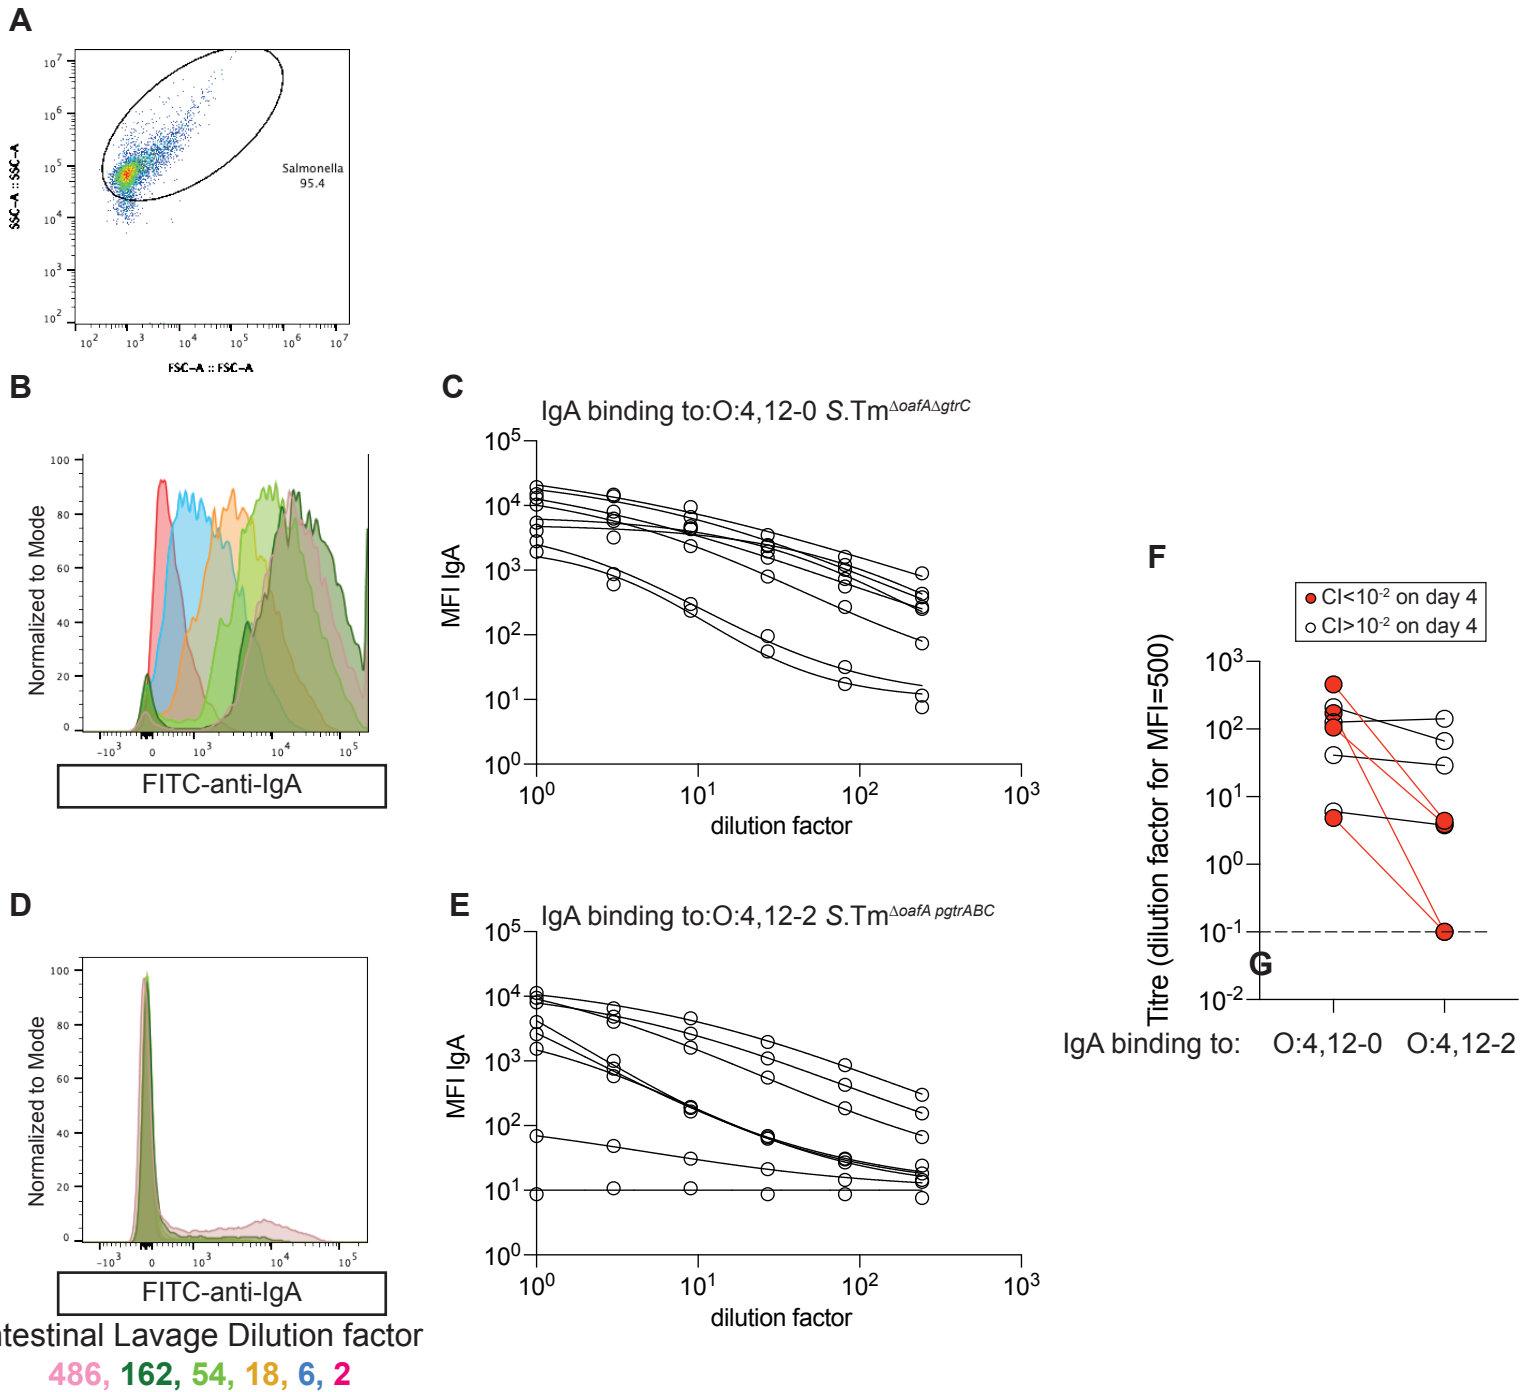

Fig. S5: Bacterial flow cytometry titring of intestinal IgA, corresponding to Fig, 1H

1443 **Fig. S5: Raw data for intestinal IgA titre calculations shown in Fig. 1H (binding**  
1444 **to  $S.Tm^{\Delta oafA, pgtrABC}$  (O:4,12-2) and  $S.Tm^{\Delta oafA \Delta grC}$  (O:4,12-0).** **A.** Forward- and side-  
1445 scatter plot showing gating based on scatter, used for all analysis. **B.** Representative  
1446 overlaid histograms of  $S.Tm^{\Delta oafA \Delta grC}$  stained with intestinal lavage from a mouse  
1447 orally vaccinated once per week for 4 weeks with PA-S  $Tm^{\Delta oafA \Delta grC}$ . BV421-  
1448 conjugated anti-mouse IgA was used as a secondary antibody to reveal IgA coating of  
1449  $S.Tm$ . Colours represent different dilutions of the intestinal lavages ranging from a  
1450 dilution factor of 2 (red) to 486 (pink). **C.** Intestinal lavage dilution factor plotted  
1451 against the median fluorescence intensity of IgA staining for all mice shown in Fig. 1H.  
1452 Lines indicate 4-parameter logistic curves fitted to these values using least-squares  
1453 non-linear regression. **D.** Representative overlaid histograms of  $S.Tm^{\Delta oafA pgtrABC}$   
1454 stained with intestinal lavage from a mouse orally vaccinated once per week for 4 weeks  
1455 with PA-S  $Tm^{\Delta oafA \Delta grC}$ . BV421-conjugated anti-mouse IgA was used as a secondary  
1456 antibody to reveal IgA coating of  $S.Tm$ . Colours represent different dilutions of the  
1457 intestinal lavages ranging from a dilution factor of 2 (red) to 486 (pink). **F.** Intestinal  
1458 IgA Titres calculated from the fitted curves as the intestinal lavage dilution giving a  
1459 median fluorescence intensity of staining = 1000 for each curve shown in E and C.  
1460 Lines link the same lavage titred against  $S.Tm^{\Delta oafA \Delta grC}$  and  $S.Tm^{\Delta oafA pgtrABC}$ . Red  
1461 symbols and lines correspond to samples in which a strain able to phase-vary O:12 out-  
1462 completed the O:12-0-locked strain by more than 100-fold on day 4. In each of these  
1463 mice, the IgA titre specific for  $S.Tm$  with an O:12-0 epitope was higher than the titre  
1464 of IgA specific for the phase-varied O:12-2 variant, whereas in mice where the ability  
1465 to phase-vary O:12 did not confer a selective advantage, titres against  $S.Tm^{\Delta oafA \Delta grC}$   
1466 and  $S.Tm^{\Delta oafA pgtrABC}$  were similar. All vaccinated mice were C57BL/6 and had an SPF  
1467 microbiota.  
1468  
1469



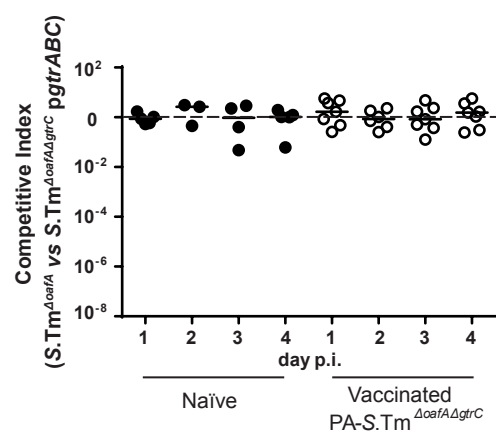

**Fig S6: The  $\Delta grC$  mutation can be complemented in trans**

1470 **Fig. S6: The  $\Delta gtrC$  mutation can be complemented in trans:** C57BL/6 mice were  
1471 vaccinated and pre-treated as in **Fig. 1**. The inoculum contained a 1:1 ratio of *S.Tm* <sup>$\Delta oafA$</sup>   
1472 and *S.Tm* <sup>$\Delta oafA \Delta gtrC$</sup>  *pgtrABC*. Competitive index in feces was determined by differential  
1473 selective plating over 4 days post-infection.  
1474

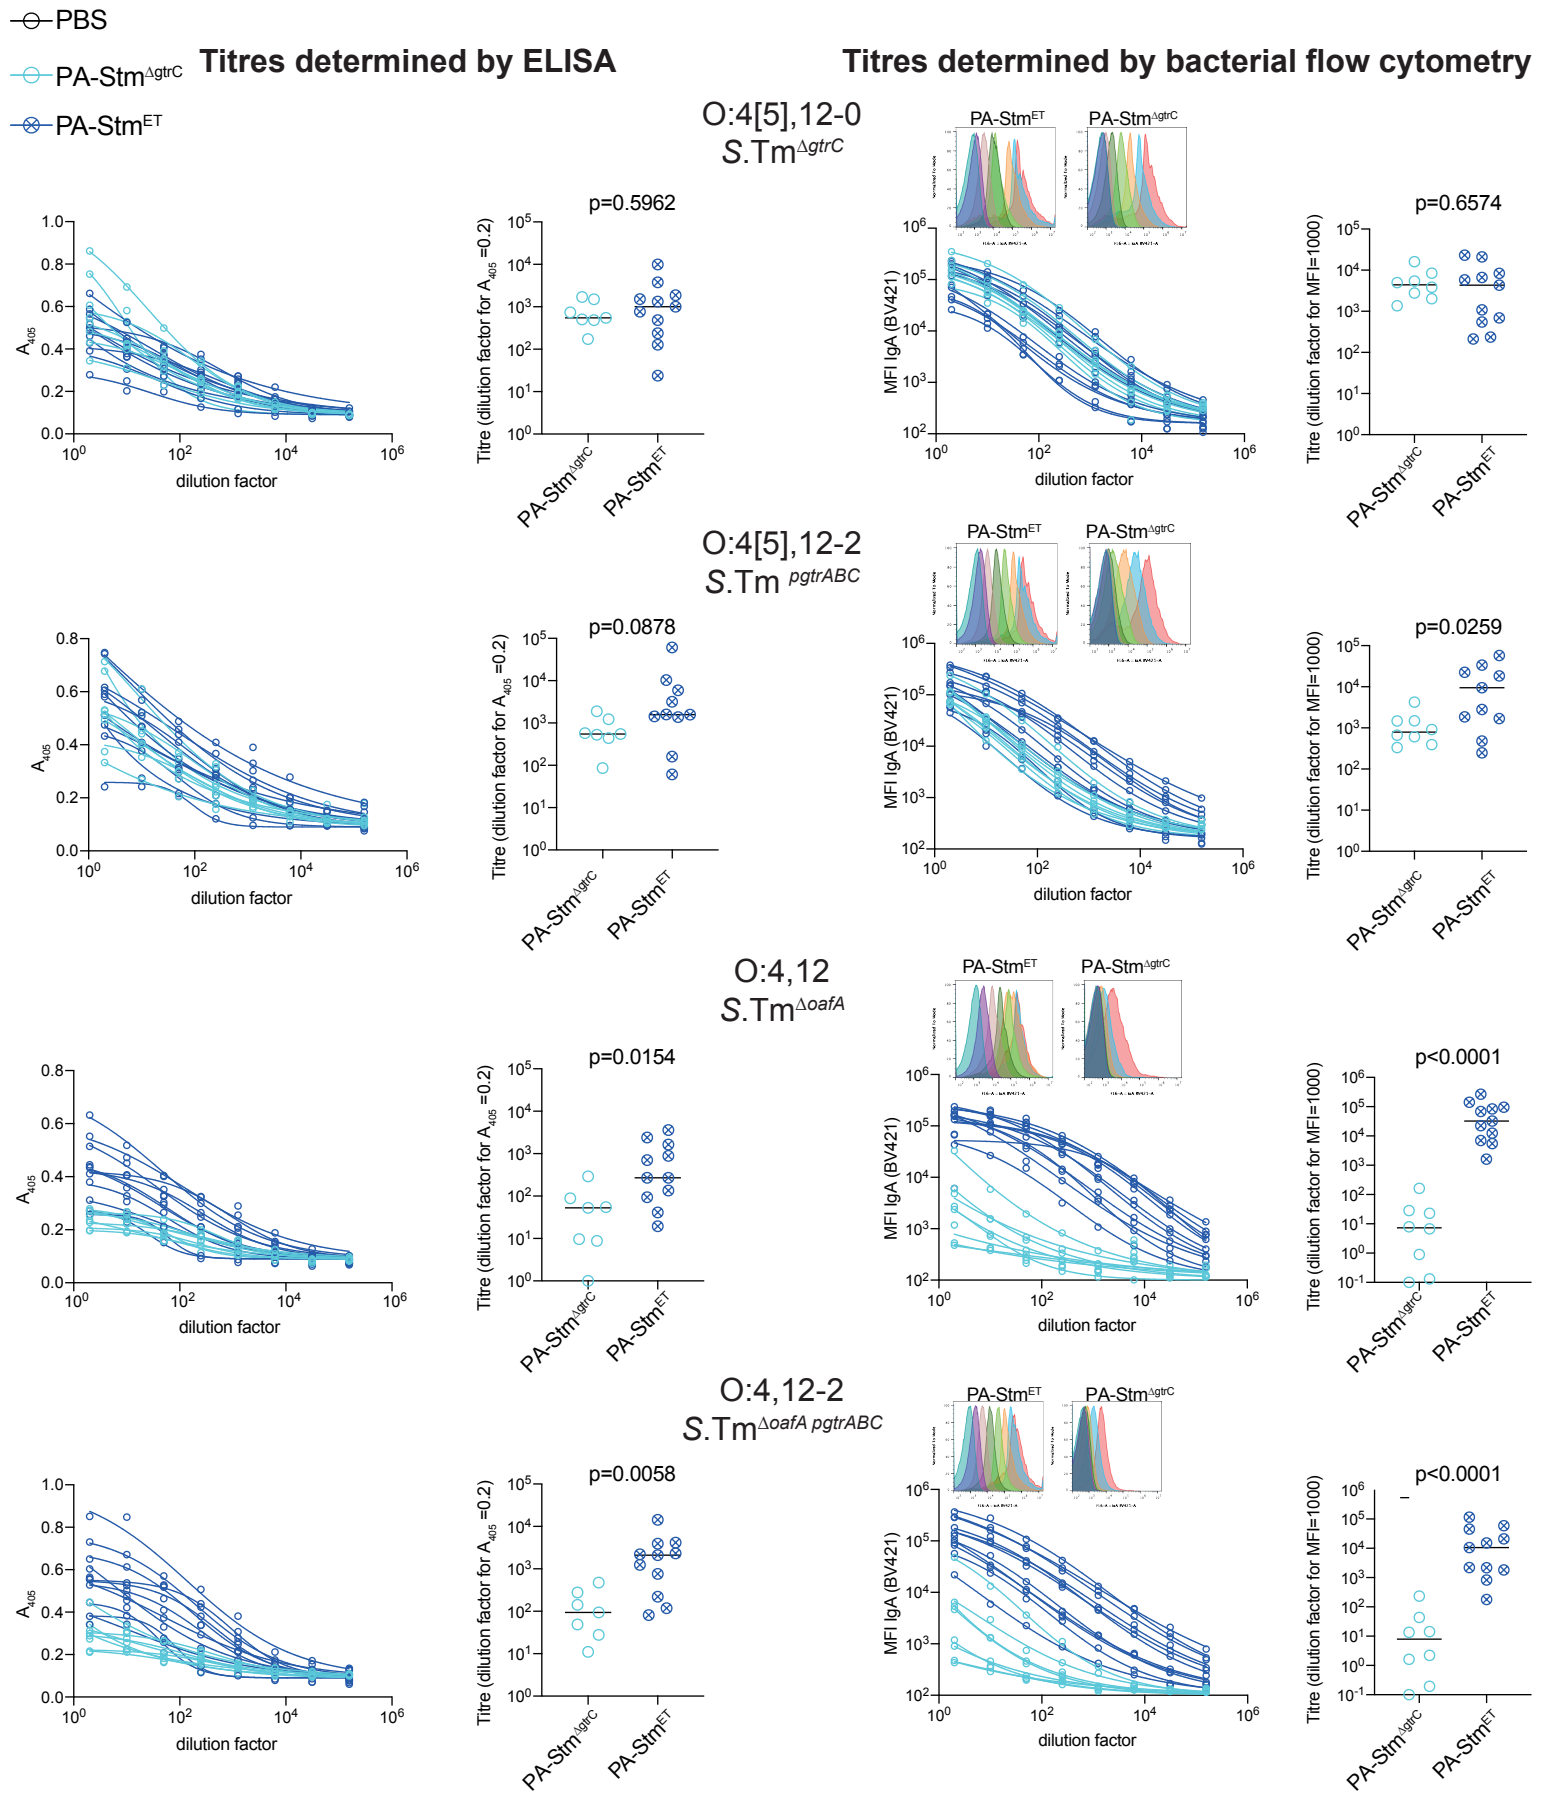

**Fig. S7: Intestinal Lavage IgA titres from uninfected mice, quantified by ELISA and bacterial flow cytometry**

1475 **Fig. S7: Intestinal lavage IgA titre calculations for uninfected C57BL/6 mice**  
1476 **vaccinated with PA-STm<sup>AgtrC</sup> and PA-STm<sup>ET</sup> by dirty-plate ELISA and flow**  
1477 **cytometry.** C57BL/6 mice received either PA-STm<sup>AgtrC</sup> (n=8) and PA-STm<sup>ET</sup> (n=11)  
1478 per os once per week for 4 weeks. On d28, mice were euthanized and intestinal lavages  
1479 collected and cleared by centrifugation. Overnight cultures of *S.Tm<sup>AgtrC</sup>*, *S.Tm<sup>pgtrABC</sup>*  
1480 *S.Tm<sup>ΔoafA</sup>* and *S.Tm<sup>ΔoafA pgtrABC</sup>* were made in 0.2μm-filtered LB containing the relevant  
1481 antibiotics. Bacteria were washed twice by centrifugation at 7000g to remove debris  
1482 that may have accumulated during growth and used to coat ELISA plates (50μl of  
1483 OD=1-0 per well) or as target for bacterial flow cytometry (10<sup>5</sup> bacteria per sample).  
1484 Titration curves plotting A405 (ELISA) or median fluorescence intensity (bacteria flow  
1485 cytometry) as read-outs of IgA binding, against dilution factor of lavages were used to  
1486 calculate titres from 4-parameter logistic curve-fits. Representative overlaid  
1487 histograms of the flow cytometry read-out from one PA-STm<sup>AgtrC</sup> and PA-STm<sup>ET</sup>-  
1488 vaccinated mouse are shown (Colours represent different 3-fold serial dilutions of the  
1489 intestinal lavage: red=2, blue=6, orange=18, green=54, dark green = 162, pink = 486.  
1490 Pre-gated on scatted as in Fig. S4). P-values were calculated using 2-tailed Mann  
1491 Whitney U tests. Flow cytometry and ELISA reveal similar results, but with flow  
1492 cytometry giving a clearer read-out. This is likely due to binding of lysed bacterial  
1493 components to the ELISA plate scaffold, including protein components that will be  
1494 identical between our strains as well as antigenic, but which are not accessible on the  
1495 surface of live cells, and are therefore irrelevant for protection. We have therefore used  
1496 bacterial flow cytometry to titre intestinal IgA throughout the manuscript as it more  
1497 straightforward to equate to IgA binding to the surface of whole, intact, live cells.  
1498  
1499

**Titres determined by ELISA**

**Titres determined by bacterial flow cytometry**

- PBS
- PA-GtrC
- PA-ET

O:4[5],12-0  
S.Tm<sup>ΔgtrC</sup>

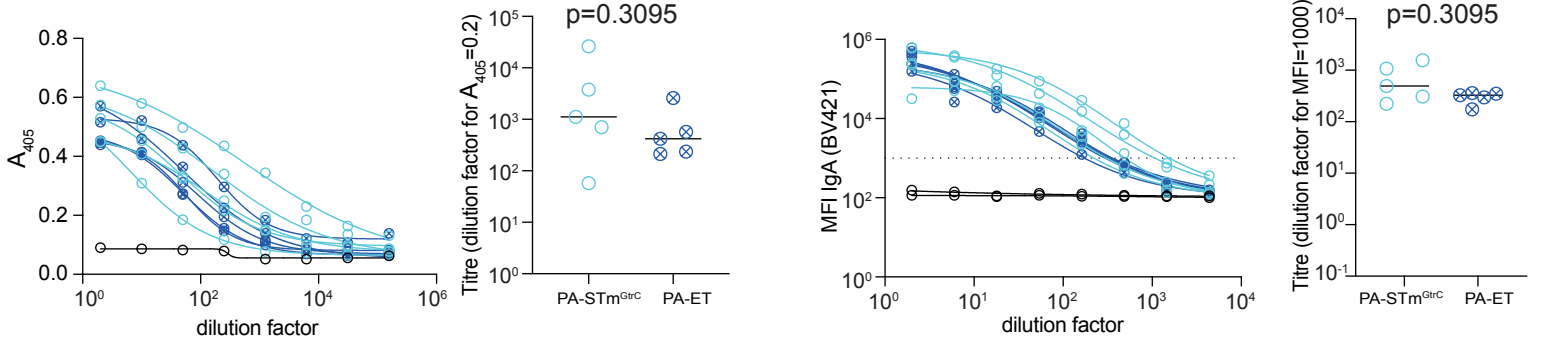

O:4[5],12-2  
S.Tm<sup>pGtrABC</sup>

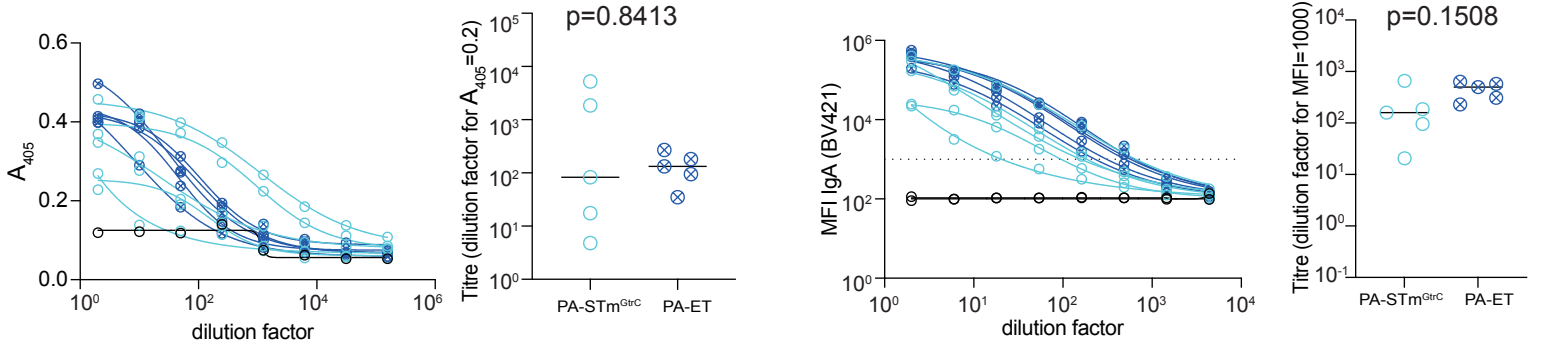

O:4,12  
S.Tm<sup>ΔOafA</sup>

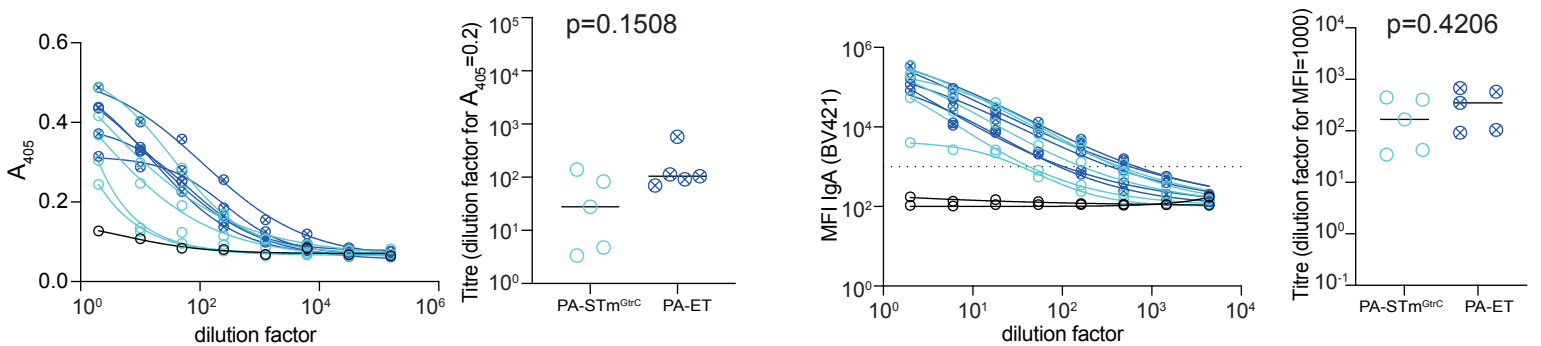

O:4,12-2  
S.Tm<sup>ΔOafA pGtrABC</sup>

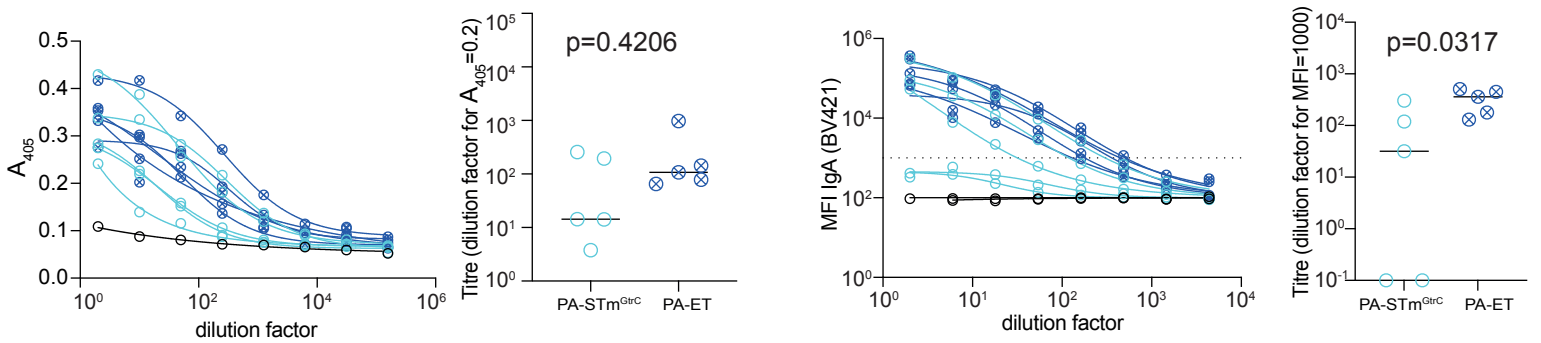

**Fig. S8: Intestinal Lavage IgA titres from d9 post-infection, quantified by ELISA and bacterial flow cytometry**

1500 **Fig. S8: Intestinal lavage IgA titre calculations for 129S1/SvImJ mice vaccinated**  
1501 **with PA-STm<sup>ΔgrC</sup> and PA-STm<sup>ET</sup> and infected with *S.Tm*<sup>WT</sup> for 9 days, by dirty-**  
1502 **plate ELISA and flow cytometry.** 129S1/SvImJ mice received the indicated vaccine  
1503 per os once per week for 4 weeks. On d28, mice were treated with oral streptomycin  
1504 and were infected with *S.Tm*<sup>WT</sup>. Nine days post-infection, all mice were euthanized and  
1505 intestinal lavages collected and cleared by centrifugation. Overnight cultures of  
1506 *S.Tm*<sup>ΔgrC</sup>, *S.Tm*<sup>pgtrABC</sup>, *S.Tm*<sup>ΔoafA</sup> and *S.Tm*<sup>ΔoafA pgtrABC</sup> were made in 0.2μm-filtered LB  
1507 containing the relevant antibiotics. Bacteria were washed twice by centrifugation at  
1508 7000g to remove debris that may have accumulated during growth and used to coat  
1509 ELISA plates (50μl of OD=1-0 per well) or as target for bacterial flow cytometry (10<sup>5</sup>  
1510 bacteria per sample). Titration curves plotting A405 (ELISA) or median fluorescence  
1511 intensity (bacteria flow cytometry) as read-outs of IgA binding, against dilution factor  
1512 of lavages were used to calculate titres from 4-parameter logistic curve-fits. P-values  
1513 were calculated using 2-tailed Mann Whitney U tests. Flow cytometry and ELISA  
1514 reveal similar results. Note that there is some broadening of the IgA response in PA-  
1515 STm<sup>ΔgrC</sup>-vaccinated mice over the 9 days of infection when compared to the data in  
1516 Fig. S7.  
1517

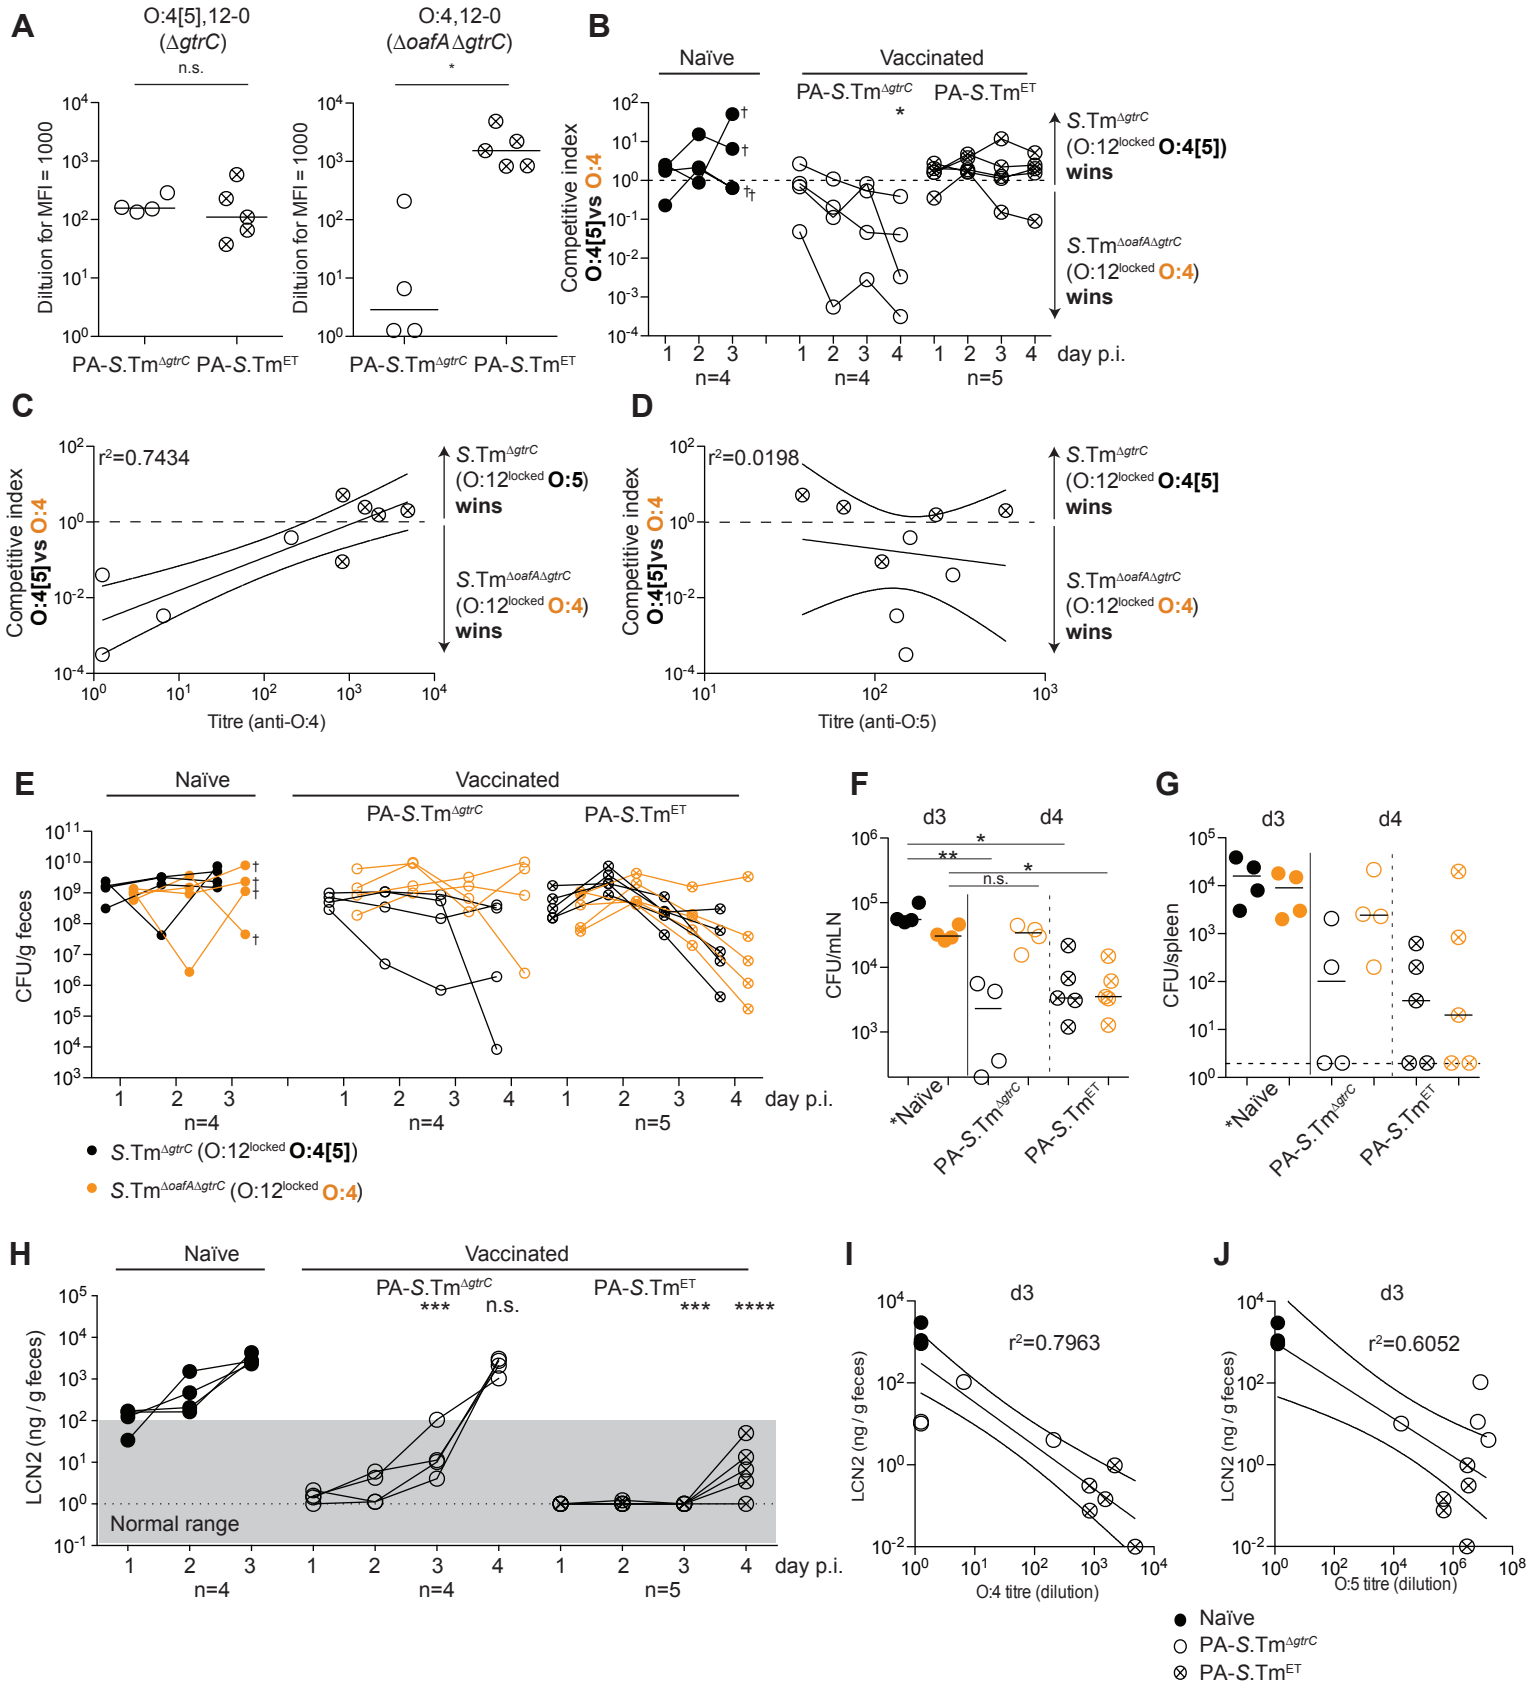

**Figure S9: IgA-driven selective pressure functions identically in SPF Balb/c mice**

1518 **Fig. S9: IgA-driven selective pressure functions identically in SPF Balb/c mice. A-**  
1519 **C.** Previous work indicated that Balb/c mice may respond better to oral vaccines and  
1520 produce more secretory IgA than C57BL/6 mice (Fransen et al. 2015), therefore we  
1521 tested the ability of PA-STm<sup>ET</sup> to protect in Balb/c mice. Naive (closed circles), PA-  
1522 S.Tm<sup>ΔgtrC</sup>-vaccinated (open circles) and PA-S.Tm<sup>ET</sup>-vaccinated (crossed-circles) SPF  
1523 Balb/c mice were streptomycin-pretreated, infected (10<sup>5</sup> CFU, 1:1 ratio of S.Tm<sup>ΔgtrC</sup>  
1524 and S.Tm<sup>ΔgtrC ΔoafA</sup> per os). Note that naïve Balb/c mice were euthanized on day 3 due  
1525 to severe disease. **A.** Secretory IgA titres (intestinal lavage dilution) against O:4[5], 12-  
1526 0, and an O:4, 12-0 S.Tm. \*p=0.0159 **B.** Competitive index (CFU S.Tm<sup>ΔgtrC</sup>/CFU  
1527 S.Tm<sup>ΔgtrC ΔoafA</sup>) in feces at the indicated time-points. 2-way ANOVA with Bonferroni  
1528 post-tests on log-normalized values, compared to naive mice. \*p<0.0285. O:4-only  
1529 producing S.Tm outcompetes in mice vaccinated with PA-STm<sup>ΔgtrC</sup> but not PA-STm<sup>ET</sup>.  
1530 **C and D.** Correlation of the competitive index with the O:4-specific (**C**) and O:4[5]-  
1531 specific (**D**) intestinal IgA titre, r<sup>2</sup> values of the linear regression of log-normalized  
1532 values. Open circles: Intestinal IgA from PA-S.Tm<sup>ΔgtrC</sup> -vaccinated mice, crossed  
1533 circles: Intestinal IgA from PA-S.Tm<sup>ET</sup> -vaccinated mice. Lines indicate the best fit  
1534 with 95% confidence interval. As both vaccinated groups have similar titres against the  
1535 O:4[5]-producing S.Tm, a correlation of C.I. is observed only with the O:4-specific IgA  
1536 titre **E.** CFU of S.Tm<sup>ΔgtrC</sup> (black symbols) and S.Tm<sup>ΔgtrC ΔoafA</sup> (orange symbols) per  
1537 gram feces at the indicated time-points. **F and G.** CFU of S.Tm<sup>ΔgtrC</sup> (black symbols)  
1538 and S.Tm<sup>ΔgtrC ΔoafA</sup> (orange symbols) per organ and day 4 post-infection (vaccinated)  
1539 and day 3 post-infection (naïve). Kruskal-Wallis test with Dunn's multiple comparison  
1540 adjusted P values are shown. \*p=0.022, \*\*p=0.0085 **H.** Fecal Lipocalin 2 as a marker  
1541 of inflammation in the indicated groups. 2-way repeat-measures ANOVA on log-  
1542 normalized data, with Bonferroni post-tests comparing to the Naïve mice.  
1543 \*\*\*p=0.0002, \*\*\*\*p<0.0001 **I and J.** Correlation between fecal lipocalin 2 on d3 post-  
1544 infection and O:4 and O:4[5]-specific intestinal IgA titres. r<sup>2</sup> values of the linear  
1545 regression of log-normalized values. Lines indicate the best fit with 95% confidence  
1546 interval. *Note that lines joining the points in B, E and H are to permit tracking of*  
1547 *individual animals through the data set, and may not be representative of what occurs*  
1548 *between the measured time-points.* This experiment was based on the observations  
1549 made in Fransen et al<sup>72</sup> that better IgA-mediated protection is achieved in Balb/c mice  
1550 than in C57BL/6 mice in response to live-attenuated vaccines. However, both mouse  
1551 lines behave similarly in this model.  
1552



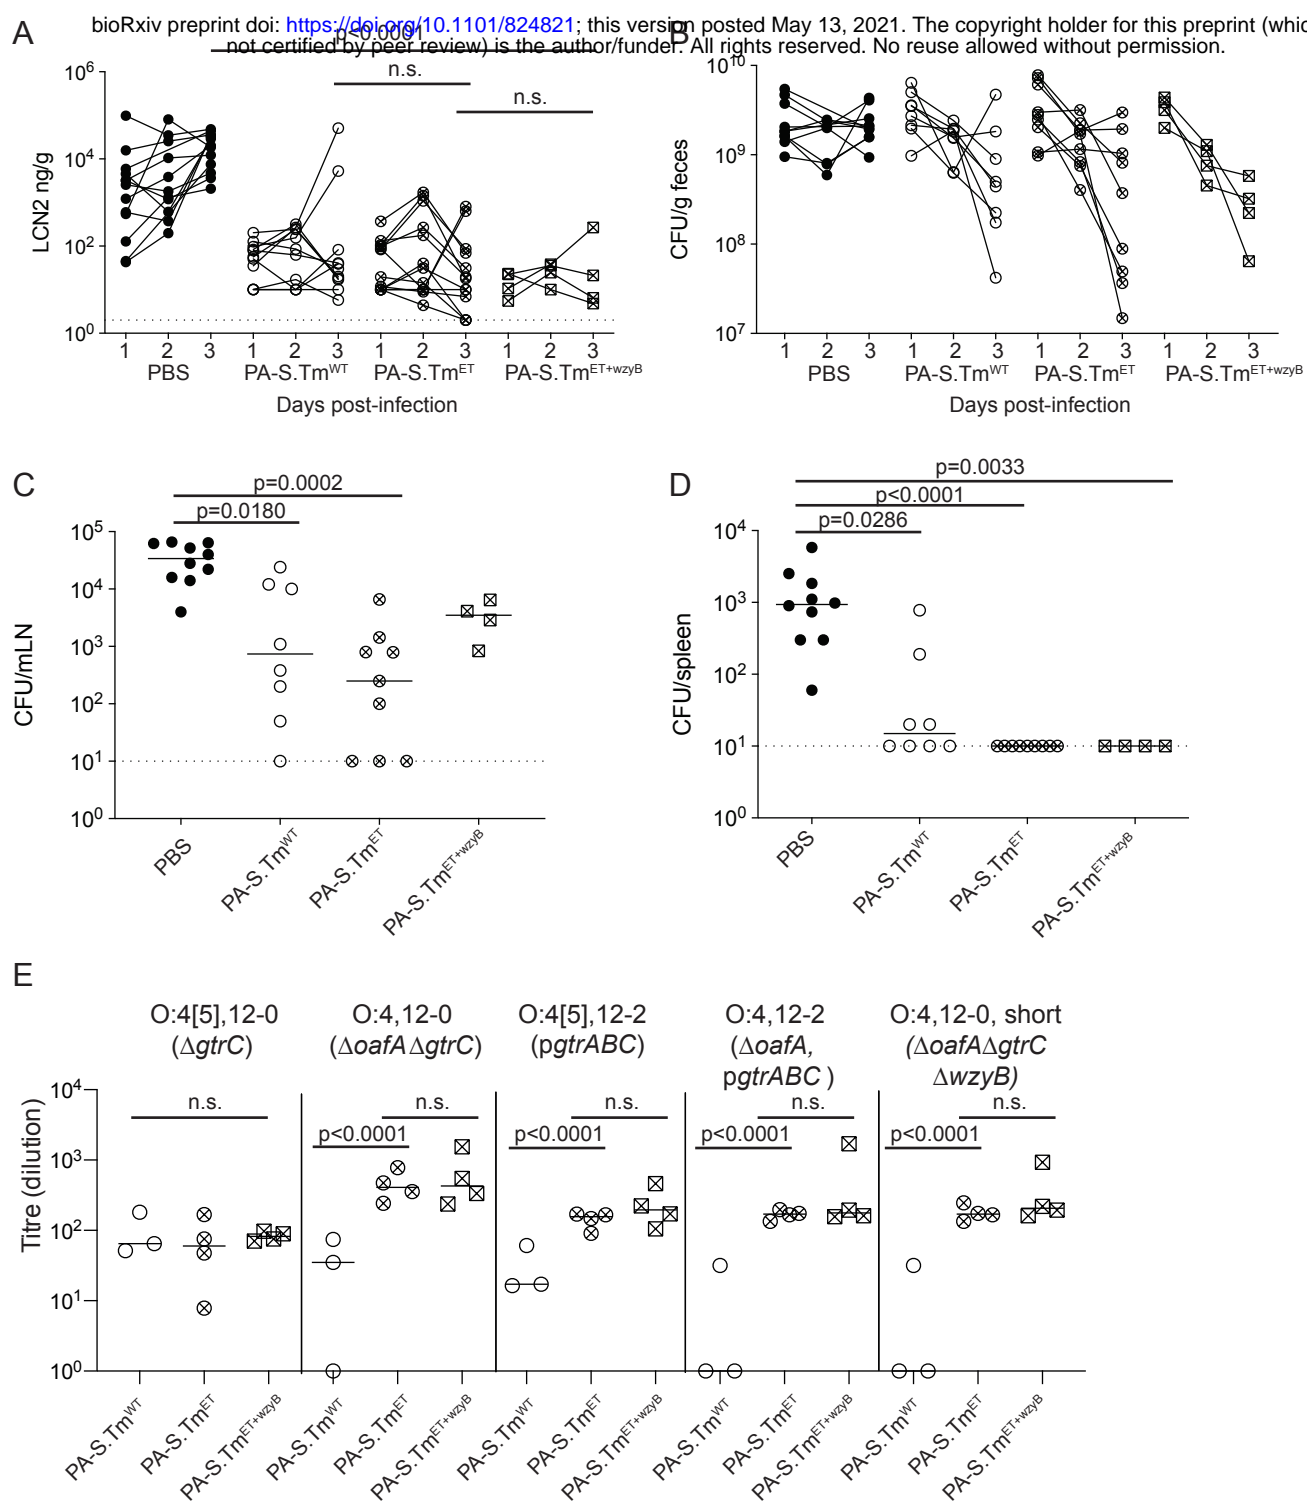

**Fig. S10. PA-STm<sup>ET</sup> mediated effects are not improved by addition of S.Tm <sup>$\Delta wzyB$</sup>  to the vaccine cocktail.**

1553

1554 **Fig S10: PA-STm<sup>ET</sup> mediated effects are not improved by addition of *S.Tm* <sup>$\Delta$ wzyB</sup>**  
1555 **to the vaccine cocktail.** C57BL/6 mice were vaccinated with vehicle only (Naïve,  
1556 n=10), PA-*S.Tm*<sup>wt</sup> (n=8), PA-STm<sup>ET</sup> (combined PA-*S.Tm* <sup>$\Delta$ gtrC</sup>, PA-*S.Tm* <sup>$\Delta$ oafA  $\Delta$ gtrC</sup>, PA-  
1557 *S.Tm* *pgtrABC*, and PA-*S.Tm* <sup>$\Delta$ oafA</sup> *pgtrABC*, n=9) or PA-STm<sup>ET+wzyB</sup> (combined PA-  
1558 *S.Tm* <sup>$\Delta$ gtrC</sup>, PA-*S.Tm* <sup>$\Delta$ oafA  $\Delta$ gtrC</sup>, PA-*S.Tm* *pgtrABC*, PA-*S.Tm* <sup>$\Delta$ oafA</sup> *pgtrABC* and PA-  
1559 *S.Tm* <sup>$\Delta$ oafA  $\Delta$ gtrC  $\Delta$ wzyB</sup>, n=4). On day 28 after the first vaccination, mice were  
1560 streptomycin pre-treated and challenged with 10<sup>5</sup> *S.Tm*<sup>wt</sup> orally. Fecal Lipocalin-2  
1561 (LCN2) at day 1-3 post-infection, (A) and CFU *S.Tm*<sup>wt</sup> per gram feces on day 1-3 post  
1562 -infection (B), CFU *S.Tm*<sup>wt</sup> per mesenteric lymph node (MLN) at day 3 post-infection  
1563 (C), and CFU *S.Tm*<sup>wt</sup> per spleen at day 3 post-infection (D). A and B, 2-way repeat-  
1564 measures ANOVA on log-normalized data with Bonferroni multiple comparisons-tests  
1565 reveals no significant difference between the vaccinated groups at any time-point.  
1566 Adjusted p values are displayed. C and D: Kruskal-Wallis analyses **with Dunn's**  
1567 **multiple comparisons-tests comparing all groups** were carried out for significance.  
1568 Exact adjusted p values displayed. E. IgA titres in intestinal lavage of an experiment  
1569 not included in (Fig. 3D), and additionally showing the group PA-*S.Tm* <sup>$\Delta$ oafA  $\Delta$ gtrC  $\Delta$ wzyB</sup>.  
1570 Titres are expressed as the dilution factor of lavage required to give an MFI=1000. 2-  
1571 way repeat-measures ANOVA on log-normalized data with Bonferroni multiple  
1572 comparisons-tests. *Note that lines joining the points in A and B are to permit tracking*  
1573 *of individual animals through the data set, and may not be representative of what*  
1574 *occurs between the measured time-points.*  
1575
